# Supplementary material for: Inhibition of Jumonji Histone Demethylases Selectively Suppresses HER2+ Breast Leptomeningeal Carcinomatosis Growth via Inhibition of GMCSF Expression
Source: Oxford University Press journal article supplement (doi:10.1158/0008-5472.can-20-3317), 2021-05-03
Supplement: 00085472can203317-sup-253018_3_supp_7065614_qrvzb1.xlsx [file 00085472can203317-sup-253018_3_supp_7065614_qrvzb1.xlsx]

## Sheet: Sheet1
Overall
Altered group
Case ID	Study ID	Number at Risk	Status	Survival Rate	Time (months)
TCGA-C8-A130	brca_tcga_pub	276	censored	1	0
TCGA-C8-A278	brca_tcga_pub	275	censored	1	0.03
TCGA-AN-A046	brca_tcga_pan_can_atlas_2018	274	censored	1	0.328764
TCGA-AN-A0AR	brca_tcga	273	censored	1	0.33
TCGA-AN-A046	brca_tcga	272	censored	1	0.33
TCGA-E9-A244	brca_tcga	271	censored	1	0.69
TCGA-E9-A244	brca_tcga_pub2015	270	censored	1	0.69
TCGA-E9-A244	brca_tcga_pan_can_atlas_2018	269	censored	1	0.690403
TCGA-A8-A08R	brca_tcga	268	censored	1	0.99
TCGA-A8-A08R	brca_tcga_pub2015	267	censored	1	0.99
TCGA-C8-A27B	brca_tcga_pub	266	censored	1	0.99
TCGA-AN-A04D	brca_tcga_pan_can_atlas_2018	265	censored	1	1.70957
TCGA-AN-A04D	brca_tcga	264	censored	1	1.71
TCGA-AN-A04D	brca_tcga_pub2015	263	censored	1	1.71
TCGA-D8-A1JE	brca_tcga_pub	262	censored	1	1.87
MB-7087	brca_metabric	261	deceased	0.996169	5.06667
TCGA-AC-A23H	brca_tcga	260	deceased	0.992337	5.72
TCGA-AC-A23H	brca_tcga_pub2015	259	deceased	0.988506	5.72
TCGA-AC-A23H	brca_tcga_pan_can_atlas_2018	258	deceased	0.984674	5.72049
TCGA-EW-A1PC	brca_tcga	257	censored	0.984674	6.14
TCGA-EW-A1PC	brca_tcga_pub2015	256	censored	0.984674	6.14
TCGA-EW-A1PC	brca_tcga_pan_can_atlas_2018	255	censored	0.984674	6.14788
TCGA-D8-A1XT	brca_tcga_pub	254	censored	0.984674	6.34
TCGA-A2-A4RW	brca_tcga	253	censored	0.984674	7.29
TCGA-A2-A4RW	brca_tcga_pub2015	252	censored	0.984674	7.29
TCGA-A2-A4RW	brca_tcga_pan_can_atlas_2018	251	censored	0.984674	7.29855
TCGA-AN-A0AK	brca_tcga_pan_can_atlas_2018	250	censored	0.984674	7.3643
TCGA-AN-A0FJ	brca_tcga_pub	249	censored	0.984674	7.92
TCGA-E2-A56Z	brca_tcga	248	censored	0.984674	8.28
TCGA-E2-A56Z	brca_tcga_pub2015	247	censored	0.984674	8.28
TCGA-E2-A56Z	brca_tcga_pan_can_atlas_2018	246	censored	0.984674	8.28484
TCGA-BH-A6R8	brca_tcga_pan_can_atlas_2018	245	censored	0.984674	9.63277
TCGA-C8-A278	brca_tcga	244	censored	0.984674	9.76
TCGA-C8-A278	brca_tcga_pub2015	243	censored	0.984674	9.76
TCGA-A8-A07P	brca_tcga	242	censored	0.984674	10.97
TCGA-A8-A07P	brca_tcga_pub2015	241	censored	0.984674	10.97
TCGA-A8-A07P	brca_tcga_pub	240	censored	0.984674	10.97
TCGA-A8-A07P	brca_tcga_pan_can_atlas_2018	239	censored	0.984674	10.9807
MB-0664	brca_metabric	238	deceased	0.980537	11.0667
TCGA-D8-A1XJ	brca_tcga_pub	237	censored	0.980537	11.56
TCGA-BH-A1EV	brca_tcga	236	deceased	0.976382	11.99
TCGA-BH-A1EV	brca_tcga_pub2015	235	deceased	0.972227	11.99
TCGA-BH-A1EV	brca_tcga_pub	234	deceased	0.968073	11.99
TCGA-BH-A1EV	brca_tcga_pan_can_atlas_2018	233	deceased	0.963918	11.9999
TCGA-C8-A130	brca_tcga	232	censored	0.963918	12.16
TCGA-C8-A130	brca_tcga_pub2015	231	censored	0.963918	12.16
TCGA-C8-A130	brca_tcga_pan_can_atlas_2018	230	censored	0.963918	12.1643
TCGA-D8-A27V	brca_tcga_pan_can_atlas_2018	229	censored	0.963918	12.5259
TCGA-C8-A26Y	brca_tcga	228	censored	0.963918	12.94
TCGA-C8-A26Y	brca_tcga_pub2015	227	censored	0.963918	12.94
TCGA-C8-A26Y	brca_tcga_pan_can_atlas_2018	226	censored	0.963918	12.9533
TCGA-A8-A06O	brca_tcga	225	censored	0.963918	13.01
TCGA-A8-A06O	brca_tcga_pub2015	224	censored	0.963918	13.01
TCGA-A8-A06O	brca_tcga_pub	223	censored	0.963918	13.01
TCGA-A8-A06O	brca_tcga_pan_can_atlas_2018	222	censored	0.963918	13.019
P-0009490	breast_msk_2018	221	censored	0.963918	13.4
TCGA-D8-A27G	brca_tcga	220	censored	0.963918	13.44
TCGA-D8-A27G	brca_tcga_pub2015	219	censored	0.963918	13.44
TCGA-D8-A27G	brca_tcga_pan_can_atlas_2018	218	censored	0.963918	13.4464
TCGA-C8-A27B	brca_tcga	217	censored	0.963918	14.42
TCGA-C8-A27B	brca_tcga_pub2015	216	censored	0.963918	14.42
TCGA-C8-A27B	brca_tcga_pan_can_atlas_2018	215	censored	0.963918	14.4327
TCGA-D8-A1XK	brca_tcga	214	censored	0.963918	14.49
TCGA-D8-A1XK	brca_tcga_pub2015	213	censored	0.963918	14.49
TCGA-D8-A1XK	brca_tcga_pan_can_atlas_2018	212	censored	0.963918	14.4985
TCGA-E2-A158	brca_tcga	211	censored	0.963918	14.78
TCGA-E2-A158	brca_tcga_pub2015	210	censored	0.963918	14.78
TCGA-E2-A158	brca_tcga_pan_can_atlas_2018	209	censored	0.963918	14.7944
MB-5529	brca_metabric	208	deceased	0.959284	14.8
TCGA-EW-A6S9	brca_tcga	207	censored	0.959284	15.21
TCGA-EW-A6S9	brca_tcga_pan_can_atlas_2018	206	censored	0.959284	15.2218
TCGA-D8-A1XZ	brca_tcga	205	censored	0.959284	15.31
TCGA-D8-A1XZ	brca_tcga_pub2015	204	censored	0.959284	15.31
TCGA-D8-A1XZ	brca_tcga_pan_can_atlas_2018	203	censored	0.959284	15.3204
MB-0582	brca_metabric	202	deceased	0.954535	15.5333
TCGA-D8-A27F	brca_tcga	201	censored	0.954535	16.03
TCGA-XX-A89A	brca_tcga	200	censored	0.954535	16.03
TCGA-D8-A27F	brca_tcga_pub2015	199	censored	0.954535	16.03
TCGA-XX-A89A	brca_tcga_pan_can_atlas_2018	198	censored	0.954535	16.0437
TCGA-AQ-A04J	brca_tcga_pub	197	censored	0.954535	16.39
TCGA-D8-A1XT	brca_tcga	196	censored	0.954535	16.62
TCGA-D8-A1XT	brca_tcga_pub2015	195	censored	0.954535	16.62
TCGA-D8-A1XT	brca_tcga_pan_can_atlas_2018	194	censored	0.954535	16.6354
MB-4649	brca_metabric	193	deceased	0.949589	16.8333
TCGA-A2-A0T5	brca_tcga	192	censored	0.949589	17.44
TCGA-A2-A0T5	brca_tcga_pub2015	191	censored	0.949589	17.44
TCGA-EW-A3U0	brca_tcga	190	censored	0.949589	17.48
TCGA-EW-A3U0	brca_tcga_pub2015	189	censored	0.949589	17.48
TCGA-D8-A1X6	brca_tcga	188	censored	0.949589	17.77
TCGA-D8-A1X6	brca_tcga_pub2015	187	censored	0.949589	17.77
TCGA-D8-A1X6	brca_tcga_pan_can_atlas_2018	186	censored	0.949589	17.7861
TCGA-A2-A04P	brca_tcga	185	deceased	0.944456	18
TCGA-A2-A04P	brca_tcga_pub2015	184	deceased	0.939323	18
TCGA-BH-A5IZ	brca_tcga	183	censored	0.939323	18.63
TCGA-BH-A5IZ	brca_tcga_pan_can_atlas_2018	182	censored	0.939323	18.6409
TCGA-D8-A1JE	brca_tcga	181	censored	0.939323	18.89
TCGA-D8-A1JE	brca_tcga_pub2015	180	censored	0.939323	18.89
TCGA-D8-A1JE	brca_tcga_pan_can_atlas_2018	179	censored	0.939323	18.9039
MB-7012	brca_metabric	178	deceased	0.934046	19.8333
TCGA-BH-A18J	brca_tcga_pub	177	deceased	0.928769	20.07
TCGA-D8-A1JK	brca_tcga	176	censored	0.928769	20.11
TCGA-BH-A2L8	brca_tcga	175	censored	0.928769	20.11
TCGA-BH-A18J	brca_tcga	174	deceased	0.923431	20.11
TCGA-BH-A18J	brca_tcga_pub2015	173	deceased	0.918093	20.11
TCGA-D8-A1JK	brca_tcga_pub2015	172	censored	0.918093	20.11
TCGA-BH-A18J	brca_tcga_pan_can_atlas_2018	171	deceased	0.912724	20.1203
TCGA-BH-A2L8	brca_tcga_pan_can_atlas_2018	170	censored	0.912724	20.1203
TCGA-D8-A1JK	brca_tcga_pan_can_atlas_2018	169	censored	0.912724	20.1203
TCGA-E2-A15E	brca_tcga_pub2015	168	censored	0.912724	20.7
TCGA-A8-A0A6	brca_tcga	167	censored	0.912724	21.02
TCGA-A7-A4SE	brca_tcga	166	censored	0.912724	21.16
TCGA-A7-A4SE	brca_tcga_pub2015	165	censored	0.912724	21.16
MB-7269	brca_metabric	164	deceased	0.907159	21.1667
MB-4769	brca_metabric	163	deceased	0.901594	21.7
TCGA-D8-A1XJ	brca_tcga	162	censored	0.901594	21.81
TCGA-D8-A1XJ	brca_tcga_pub2015	161	censored	0.901594	21.81
MB-5173	brca_metabric	160	deceased	0.895959	22.1333
TCGA-E2-A15A	brca_tcga_pan_can_atlas_2018	159	censored	0.895959	23.3422
TCGA-BH-A0DG	brca_tcga_pub	158	censored	0.895959	23.43
TCGA-A7-A26F	brca_tcga	157	censored	0.895959	24.24
TCGA-A7-A26F	brca_tcga_pub2015	156	censored	0.895959	24.24
TCGA-A7-A26F	brca_tcga_pan_can_atlas_2018	155	censored	0.895959	24.2627
MB-0666	brca_metabric	154	deceased	0.890141	24.3333
TCGA-BH-A0BG	brca_tcga_pub	153	censored	0.890141	24.84
MB-0401	brca_metabric	152	deceased	0.884285	26.2667
MB-7135	brca_metabric	151	deceased	0.878428	26.7333
MB-3360	brca_metabric	150	deceased	0.872572	26.7667
TCGA-AQ-A04J	brca_tcga	149	censored	0.872572	26.91
TCGA-AQ-A04J	brca_tcga_pub2015	148	censored	0.872572	26.91
MB-5126	brca_metabric	147	deceased	0.866636	27.3
TCGA-E2-A14S	brca_tcga_pub	146	censored	0.866636	27.4
MB-6280	brca_metabric	145	deceased	0.860659	27.8667
TCGA-OL-A6VO	brca_tcga	144	censored	0.860659	28.19
TCGA-A2-A0YM	brca_tcga_pub	143	censored	0.860659	31.67
TCGA-A2-A0YM	brca_tcga	142	censored	0.860659	31.7
TCGA-A2-A0YM	brca_tcga_pub2015	141	censored	0.860659	31.7
TCGA-A2-A0YM	brca_tcga_pan_can_atlas_2018	140	censored	0.860659	31.7257
TCGA-AO-A0J2	brca_tcga	139	censored	0.860659	32.75
TCGA-AO-A0J2	brca_tcga_pan_can_atlas_2018	138	censored	0.860659	32.7777
TCGA-A8-A09I	brca_tcga_pub	137	censored	0.860659	33.05
MB-0621	brca_metabric	136	censored	0.860659	33.5667
TCGA-A7-A0DA	brca_tcga	135	censored	0.860659	35.64
TCGA-A7-A0DA	brca_tcga_pub2015	134	censored	0.860659	35.64
TCGA-AR-A1AX	brca_tcga_pub	133	censored	0.860659	36.24
TCGA-OL-A5D6	brca_tcga	132	deceased	0.854139	36.27
TCGA-OL-A5D6	brca_tcga_pan_can_atlas_2018	131	deceased	0.847619	36.2955
MB-0129	brca_metabric	130	deceased	0.841099	38.5667
TCGA-BH-A203	brca_tcga	129	deceased	0.834579	38.57
TCGA-E2-A14R	brca_tcga	128	censored	0.834579	38.57
TCGA-E2-A14R	brca_tcga_pub2015	127	censored	0.834579	38.57
TCGA-BH-A203	brca_tcga_pub2015	126	deceased	0.827955	38.57
TCGA-BH-A203	brca_tcga_pan_can_atlas_2018	125	deceased	0.821332	38.5968
TCGA-E2-A14R	brca_tcga_pan_can_atlas_2018	124	censored	0.821332	38.5968
TCGA-E9-A22A	brca_tcga	123	censored	0.821332	39.06
TCGA-E9-A22A	brca_tcga_pub2015	122	censored	0.821332	39.06
TCGA-E9-A1NC	brca_tcga	121	censored	0.821332	39.52
TCGA-E9-A1NC	brca_tcga_pan_can_atlas_2018	120	censored	0.821332	39.5503
TCGA-E9-A22G	brca_tcga	119	censored	0.821332	40.7
TCGA-E9-A22G	brca_tcga_pub2015	118	censored	0.821332	40.7
TCGA-E2-A14N	brca_tcga_pub	117	censored	0.821332	44.35
MB-2771	brca_metabric	116	deceased	0.814251	44.8333
TCGA-A8-A09I	brca_tcga	115	censored	0.814251	45.04
TCGA-A8-A09I	brca_tcga_pub2015	114	censored	0.814251	45.04
TCGA-A8-A09I	brca_tcga_pan_can_atlas_2018	113	censored	0.814251	45.0735
MB-0434	brca_metabric	112	deceased	0.806981	45.5
MB-0350	brca_metabric	111	deceased	0.799711	46.0667
TCGA-E2-A14N	brca_tcga	110	censored	0.799711	47.11
TCGA-E2-A14N	brca_tcga_pub2015	109	censored	0.799711	47.11
MB-0165	brca_metabric	108	deceased	0.792306	47.6333
MB-4154	brca_metabric	107	deceased	0.784901	49.5667
TCGA-BH-A18U	brca_tcga	106	deceased	0.777497	51.35
TCGA-BH-A18U	brca_tcga_pub2015	105	deceased	0.770092	51.35
TCGA-BH-A18U	brca_tcga_pan_can_atlas_2018	104	deceased	0.762687	51.3857
MB-7225	brca_metabric	103	deceased	0.755283	55
MB-4298	brca_metabric	102	deceased	0.747878	55.1
MB-0663	brca_metabric	101	censored	0.747878	55.3667
MB-4601	brca_metabric	100	deceased	0.740399	56.2667
TCGA-BH-A0B7	brca_tcga_pub	99	censored	0.740399	56.94
TCGA-GM-A2D9	brca_tcga	98	deceased	0.732844	59.53
TCGA-GM-A2D9	brca_tcga_pub2015	97	deceased	0.725289	59.53
TCGA-GM-A2D9	brca_tcga_pan_can_atlas_2018	96	deceased	0.717734	59.5719
MB-0396	brca_metabric	95	censored	0.717734	60.6667
TCGA-BH-A0BG	brca_tcga	94	censored	0.717734	61.47
TCGA-BH-A0BG	brca_tcga_pub2015	93	censored	0.717734	61.47
TCGA-BH-A0BG	brca_tcga_pan_can_atlas_2018	92	censored	0.717734	61.5117
MB-3470	brca_metabric	91	deceased	0.709847	62.5333
MB-5634	brca_metabric	90	deceased	0.701959	62.9
TCGA-E2-A150	brca_tcga	89	censored	0.701959	63.57
TCGA-E2-A150	brca_tcga_pub2015	88	censored	0.701959	63.57
TCGA-E2-A150	brca_tcga_pan_can_atlas_2018	87	censored	0.701959	63.6157
TCGA-A2-A04W	brca_tcga_pub	86	censored	0.701959	64
MB-0115	brca_metabric	85	deceased	0.693701	66.7333
TCGA-BH-A0DG	brca_tcga	84	censored	0.693701	67.05
TCGA-BH-A0DG	brca_tcga_pub2015	83	censored	0.693701	67.05
TCGA-BH-A0DG	brca_tcga_pan_can_atlas_2018	82	censored	0.693701	67.1006
MB-4351	brca_metabric	81	deceased	0.685137	68.1333
MB-0662	brca_metabric	80	deceased	0.676573	69.8
MB-7020	brca_metabric	79	deceased	0.668008	71.6333
TCGA-BH-A1FN	brca_tcga	78	deceased	0.659444	72.01
TCGA-BH-A1FN	brca_tcga_pub2015	77	deceased	0.65088	72.01
TCGA-BH-A1FN	brca_tcga_pan_can_atlas_2018	76	deceased	0.642316	72.065
MB-0241	brca_metabric	75	deceased	0.633752	73.1333
TCGA-A2-A04T	brca_tcga	74	censored	0.633752	73.78
TCGA-A2-A04T	brca_tcga_pub2015	73	censored	0.633752	73.78
TCGA-A2-A04T	brca_tcga_pan_can_atlas_2018	72	censored	0.633752	73.8403
TCGA-E2-A14T	brca_tcga	71	censored	0.633752	75.92
TCGA-A2-A04Q	brca_tcga	70	censored	0.633752	78.35
TCGA-A2-A04Q	brca_tcga_pub2015	69	censored	0.633752	78.35
MB-6329	brca_metabric	68	deceased	0.624432	81.5
TCGA-BH-A0B6	brca_tcga	67	censored	0.624432	81.57
TCGA-BH-A0B6	brca_tcga_pub2015	66	censored	0.624432	81.57
MB-6169	brca_metabric	65	deceased	0.614825	84.7333
TCGA-GM-A2DI	brca_tcga_pan_can_atlas_2018	64	censored	0.614825	85.1498
TCGA-AR-A1AX	brca_tcga	63	censored	0.614825	86.37
TCGA-AR-A1AX	brca_tcga_pub2015	62	censored	0.614825	86.37
TCGA-AR-A1AX	brca_tcga_pan_can_atlas_2018	61	censored	0.614825	86.4319
MB-2796	brca_metabric	60	deceased	0.604578	87.7
MB-0170	brca_metabric	59	deceased	0.594331	93.3667
MB-0370	brca_metabric	58	deceased	0.584084	93.5
MB-0658	brca_metabric	57	censored	0.584084	97.2667
TCGA-AR-A24Z	brca_tcga	56	censored	0.584084	98.59
TCGA-AR-A24Z	brca_tcga_pan_can_atlas_2018	55	censored	0.584084	98.6619
MB-5224	brca_metabric	54	deceased	0.573267	99.4
TCGA-B6-A0RS	brca_tcga	53	deceased	0.562451	100.62
TCGA-B6-A0RS	brca_tcga_pan_can_atlas_2018	52	deceased	0.551635	100.7
TCGA-A2-A04W	brca_tcga	51	censored	0.551635	101.91
TCGA-A2-A04W	brca_tcga_pub2015	50	censored	0.551635	101.91
TCGA-A2-A04W	brca_tcga_pan_can_atlas_2018	49	censored	0.551635	101.982
MB-7154	brca_metabric	48	deceased	0.540142	108.467
TCGA-AQ-A04L	brca_tcga_pub	47	censored	0.540142	109.87
MB-6337	brca_metabric	46	deceased	0.5284	110.867
MB-0474	brca_metabric	45	deceased	0.516658	111.1
MB-6207	brca_metabric	44	deceased	0.504916	118.3
MB-7161	brca_metabric	43	censored	0.504916	121.533
MB-4942	brca_metabric	42	deceased	0.492894	124.133
MB-0201	brca_metabric	41	censored	0.492894	125.7
MB-6334	brca_metabric	40	censored	0.492894	128.1
TCGA-AQ-A04L	brca_tcga	39	censored	0.492894	129.99
TCGA-AQ-A04L	brca_tcga_pub2015	38	censored	0.492894	129.99
TCGA-BH-A209	brca_tcga	37	deceased	0.479572	130.06
TCGA-BH-A209	brca_tcga_pub2015	36	deceased	0.466251	130.06
TCGA-BH-A209	brca_tcga_pub	35	deceased	0.452929	130.07
TCGA-AQ-A04L	brca_tcga_pan_can_atlas_2018	34	censored	0.452929	130.092
TCGA-BH-A209	brca_tcga_pan_can_atlas_2018	33	deceased	0.439204	130.157
MB-0200	brca_metabric	32	deceased	0.425479	130.867
TCGA-AR-A0U1	brca_tcga	31	censored	0.425479	133.11
MB-2708	brca_metabric	30	deceased	0.411297	133.233
MB-7073	brca_metabric	29	deceased	0.397114	137.933
MB-0169	brca_metabric	28	deceased	0.382931	145.433
MB-3211	brca_metabric	27	censored	0.382931	145.5
MB-4732	brca_metabric	26	censored	0.382931	149.867
MB-2834	brca_metabric	25	deceased	0.367614	153.833
MB-5642	brca_metabric	24	deceased	0.352297	156.8
MB-0107	brca_metabric	23	censored	0.352297	158.033
MB-5327	brca_metabric	22	censored	0.352297	163.533
MB-3123	brca_metabric	21	censored	0.352297	167.433
TCGA-B6-A0IJ	brca_tcga_pub	20	censored	0.352297	176.86
MB-6248	brca_metabric	19	censored	0.352297	182.833
MB-4300	brca_metabric	18	censored	0.352297	189.033
MB-5440	brca_metabric	17	censored	0.352297	196.633
MB-0256	brca_metabric	16	censored	0.352297	200.7
MB-0236	brca_metabric	15	censored	0.352297	205.033
MB-6182	brca_metabric	14	censored	0.352297	208.8
MB-4949	brca_metabric	13	censored	0.352297	216.967
MB-3021	brca_metabric	12	deceased	0.322939	217.567
MB-2616	brca_metabric	11	deceased	0.293581	219.167
MB-3165	brca_metabric	10	censored	0.293581	221.233
MB-3502	brca_metabric	9	censored	0.293581	229.333
TCGA-B6-A0IJ	brca_tcga	8	censored	0.293581	233.44
TCGA-B6-A0IJ	brca_tcga_pub2015	7	censored	0.293581	233.44
TCGA-B6-A0IJ	brca_tcga_pan_can_atlas_2018	6	censored	0.293581	233.619
MB-2744	brca_metabric	5	censored	0.293581	275.633
MB-2718	brca_metabric	4	censored	0.293581	278.267
MB-4622	brca_metabric	3	deceased	0.19572	282.833
MB-4809	brca_metabric	2	censored	0.19572	286.067
MB-4633	brca_metabric	1	censored	0.19572	318.2
Unaltered group
Case ID	Study ID	Number at Risk	Status	Survival Rate	Time (months)
TCGA-PL-A8LV	brca_tcga	7270	censored	1	-0.23
MB-0284	brca_metabric	7269	censored	1	0
TCGA-A8-A06N	brca_tcga	7268	censored	1	0
TCGA-A8-A081	brca_tcga	7267	censored	1	0
TCGA-A8-A083	brca_tcga	7266	censored	1	0
TCGA-A8-A08H	brca_tcga	7265	censored	1	0
TCGA-A8-A090	brca_tcga	7264	censored	1	0
TCGA-A8-A094	brca_tcga	7263	censored	1	0
TCGA-A8-A096	brca_tcga	7262	censored	1	0
TCGA-A8-A09G	brca_tcga	7261	censored	1	0
TCGA-A8-A09Z	brca_tcga	7260	censored	1	0
TCGA-C8-A12K	brca_tcga	7259	censored	1	0
TCGA-C8-A12T	brca_tcga	7258	censored	1	0
TCGA-C8-A133	brca_tcga	7257	censored	1	0
TCGA-A8-A06N	brca_tcga_pan_can_atlas_2018	7256	censored	1	0
TCGA-A8-A081	brca_tcga_pan_can_atlas_2018	7255	censored	1	0
TCGA-A8-A083	brca_tcga_pan_can_atlas_2018	7254	censored	1	0
TCGA-A8-A08H	brca_tcga_pan_can_atlas_2018	7253	censored	1	0
TCGA-A8-A090	brca_tcga_pan_can_atlas_2018	7252	censored	1	0
TCGA-A8-A094	brca_tcga_pan_can_atlas_2018	7251	censored	1	0
TCGA-A8-A096	brca_tcga_pan_can_atlas_2018	7250	censored	1	0
TCGA-A8-A09G	brca_tcga_pan_can_atlas_2018	7249	censored	1	0
TCGA-A8-A09Z	brca_tcga_pan_can_atlas_2018	7248	censored	1	0
TCGA-C8-A12K	brca_tcga_pan_can_atlas_2018	7247	censored	1	0
TCGA-C8-A12T	brca_tcga_pan_can_atlas_2018	7246	censored	1	0
TCGA-C8-A133	brca_tcga_pan_can_atlas_2018	7245	censored	1	0
TCGA-PL-A8LV	brca_tcga_pan_can_atlas_2018	7244	censored	1	0
TCGA-A8-A06N	brca_tcga_pub2015	7243	censored	1	0
TCGA-A8-A083	brca_tcga_pub2015	7242	censored	1	0
TCGA-A8-A081	brca_tcga_pub2015	7241	censored	1	0
TCGA-C8-A133	brca_tcga_pub2015	7240	censored	1	0
TCGA-C8-A12T	brca_tcga_pub2015	7239	censored	1	0
TCGA-C8-A12K	brca_tcga_pub2015	7238	censored	1	0
TCGA-A8-A09Z	brca_tcga_pub2015	7237	censored	1	0
TCGA-A8-A08H	brca_tcga_pub2015	7236	censored	1	0
TCGA-A8-A090	brca_tcga_pub2015	7235	censored	1	0
TCGA-A8-A094	brca_tcga_pub2015	7234	censored	1	0
TCGA-A8-A096	brca_tcga_pub2015	7233	censored	1	0
TCGA-A8-A09G	brca_tcga_pub2015	7232	censored	1	0
TCGA-A8-A08H	brca_tcga_pub	7231	censored	1	0
TCGA-C8-A12K	brca_tcga_pub	7230	censored	1	0
TCGA-C8-A12V	brca_tcga_pub	7229	censored	1	0
TCGA-C8-A131	brca_tcga_pub	7228	censored	1	0
TCGA-C8-A134	brca_tcga_pub	7227	censored	1	0
TCGA-A8-A081	brca_tcga_pub	7226	censored	1	0
TCGA-A8-A094	brca_tcga_pub	7225	censored	1	0
TCGA-A8-A09G	brca_tcga_pub	7224	censored	1	0
TCGA-C8-A12L	brca_tcga_pub	7223	censored	1	0
TCGA-C8-A12P	brca_tcga_pub	7222	censored	1	0
TCGA-C8-A12Q	brca_tcga_pub	7221	censored	1	0
TCGA-C8-A12T	brca_tcga_pub	7220	censored	1	0
TCGA-C8-A12Z	brca_tcga_pub	7219	censored	1	0
TCGA-C8-A135	brca_tcga_pub	7218	censored	1	0
TCGA-C8-A1HF	brca_tcga_pub	7217	censored	1	0
TCGA-A8-A083	brca_tcga_pub	7216	censored	1	0
TCGA-A8-A090	brca_tcga_pub	7215	censored	1	0
TCGA-BH-A18H	brca_tcga_pub	7214	censored	1	0
TCGA-C8-A12N	brca_tcga_pub	7213	censored	1	0
TCGA-C8-A12O	brca_tcga_pub	7212	censored	1	0
TCGA-C8-A12Y	brca_tcga_pub	7211	censored	1	0
TCGA-C8-A132	brca_tcga_pub	7210	censored	1	0
TCGA-C8-A133	brca_tcga_pub	7209	censored	1	0
TCGA-A8-A06N	brca_tcga_pub	7208	censored	1	0
TCGA-A8-A096	brca_tcga_pub	7207	censored	1	0
TCGA-A8-A09Z	brca_tcga_pub	7206	censored	1	0
TCGA-C8-A12M	brca_tcga_pub	7205	censored	1	0
TCGA-C8-A12U	brca_tcga_pub	7204	censored	1	0
TCGA-C8-A12W	brca_tcga_pub	7203	censored	1	0
TCGA-C8-A12X	brca_tcga_pub	7202	censored	1	0
TCGA-C8-A1HG	brca_tcga_pub	7201	censored	1	0
TCGA-C8-A1HE	brca_tcga_pub	7200	censored	1	0
TCGA-C8-A1HO	brca_tcga_pub	7199	censored	1	0
TCGA-D8-A1JB	brca_tcga_pub	7198	censored	1	0
TCGA-E9-A1N3	brca_tcga_pub	7197	censored	1	0
TCGA-E9-A1N4	brca_tcga_pub	7196	censored	1	0
TCGA-E9-A1N5	brca_tcga_pub	7195	censored	1	0
TCGA-E9-A1N6	brca_tcga_pub	7194	censored	1	0
TCGA-E9-A1N8	brca_tcga_pub	7193	censored	1	0
TCGA-E9-A1N9	brca_tcga_pub	7192	censored	1	0
TCGA-E9-A1NA	brca_tcga_pub	7191	censored	1	0
TCGA-E9-A1NC	brca_tcga_pub	7190	censored	1	0
TCGA-E9-A1ND	brca_tcga_pub	7189	censored	1	0
TCGA-E9-A1NE	brca_tcga_pub	7188	censored	1	0
TCGA-E9-A1NF	brca_tcga_pub	7187	censored	1	0
TCGA-E9-A1NG	brca_tcga_pub	7186	censored	1	0
TCGA-E9-A1NH	brca_tcga_pub	7185	censored	1	0
TCGA-E9-A1NI	brca_tcga_pub	7184	censored	1	0
TCGA-E9-A1QZ	brca_tcga_pub	7183	censored	1	0
TCGA-E9-A1R0	brca_tcga_pub	7182	censored	1	0
TCGA-E9-A228	brca_tcga_pub	7181	censored	1	0
TCGA-E9-A229	brca_tcga_pub	7180	censored	1	0
TCGA-E9-A22A	brca_tcga_pub	7179	censored	1	0
TCGA-E9-A22B	brca_tcga_pub	7178	censored	1	0
TCGA-E9-A22D	brca_tcga_pub	7177	censored	1	0
TCGA-E9-A22E	brca_tcga_pub	7176	censored	1	0
TCGA-E9-A22G	brca_tcga_pub	7175	censored	1	0
TCGA-E9-A22H	brca_tcga_pub	7174	censored	1	0
TCGA-C8-A275	brca_tcga	7173	censored	1	0.03
TCGA-AC-A7VC	brca_tcga	7172	censored	1	0.03
TCGA-C8-A275	brca_tcga_pub2015	7171	censored	1	0.03
TCGA-C8-A274	brca_tcga_pub	7170	censored	1	0.03
TCGA-C8-A275	brca_tcga_pub	7169	censored	1	0.03
TCGA-AC-A7VC	brca_tcga_pan_can_atlas_2018	7168	censored	1	0.0328764
TCGA-C8-A275	brca_tcga_pan_can_atlas_2018	7167	censored	1	0.0328764
TCGA-D8-A147	brca_tcga_pub	7166	censored	1	0.07
TCGA-C8-A1HI	brca_tcga_pub	7165	censored	1	0.07
TCGA-C8-A1HL	brca_tcga_pub	7164	censored	1	0.07
TCGA-C8-A1HN	brca_tcga_pub	7163	censored	1	0.07
MB-6229	brca_metabric	7162	deceased	0.99986	0.1
TCGA-C8-A137	brca_tcga_pub	7161	censored	0.99986	0.1
TCGA-C8-A26Z	brca_tcga_pub	7160	censored	0.99986	0.13
TCGA-C8-A1HJ	brca_tcga	7159	censored	0.99986	0.16
TCGA-PL-A8LX	brca_tcga	7158	censored	0.99986	0.16
TCGA-AN-A0AM	brca_tcga	7157	censored	0.99986	0.16
TCGA-C8-A1HJ	brca_tcga_pub2015	7156	censored	0.99986	0.16
TCGA-AN-A0AM	brca_tcga_pub2015	7155	censored	0.99986	0.16
TCGA-AN-A0AM	brca_tcga_pub	7154	censored	0.99986	0.16
TCGA-C8-A1HJ	brca_tcga_pub	7153	censored	0.99986	0.16
TCGA-AN-A0AM	brca_tcga_pan_can_atlas_2018	7152	censored	0.99986	0.164382
TCGA-C8-A1HJ	brca_tcga_pan_can_atlas_2018	7151	censored	0.99986	0.164382
TCGA-PL-A8LX	brca_tcga_pan_can_atlas_2018	7150	censored	0.99986	0.164382
TCGA-C8-A1HM	brca_tcga_pub	7149	censored	0.99986	0.2
TCGA-C8-A273	brca_tcga_pub	7148	censored	0.99986	0.2
TCGA-AN-A041	brca_tcga	7147	censored	0.99986	0.23
TCGA-C8-A138	brca_tcga_pub	7146	censored	0.99986	0.23
TCGA-AN-A041	brca_tcga_pub	7145	censored	0.99986	0.23
TCGA-C8-A1HK	brca_tcga_pub	7144	censored	0.99986	0.23
TCGA-C8-A26W	brca_tcga_pub	7143	censored	0.99986	0.23
TCGA-AN-A041	brca_tcga_pan_can_atlas_2018	7142	censored	0.99986	0.230134
TCGA-PL-A8LY	brca_tcga	7141	censored	0.99986	0.26
TCGA-AR-A0U0	brca_tcga_pub	7140	censored	0.99986	0.26
TCGA-PL-A8LY	brca_tcga_pan_can_atlas_2018	7139	censored	0.99986	0.263011
TCGA-AN-A0XP	brca_tcga_pan_can_atlas_2018	7138	censored	0.99986	0.295887
TCGA-AN-A0XP	brca_tcga	7137	censored	0.99986	0.3
TCGA-AN-A0AR	brca_tcga_pub	7136	censored	0.99986	0.3
TCGA-AN-A0XP	brca_tcga_pub	7135	censored	0.99986	0.3
TCGA-AN-A0AS	brca_tcga_pub	7134	censored	0.99986	0.3
TCGA-C8-A26V	brca_tcga_pub	7133	censored	0.99986	0.3
TCGA-AN-A03X	brca_tcga_pan_can_atlas_2018	7132	censored	0.99986	0.328764
TCGA-AN-A03Y	brca_tcga_pan_can_atlas_2018	7131	censored	0.99986	0.328764
TCGA-AN-A0AR	brca_tcga_pan_can_atlas_2018	7130	censored	0.99986	0.328764
TCGA-AN-A0AS	brca_tcga_pan_can_atlas_2018	7129	censored	0.99986	0.328764
TCGA-AN-A0AT	brca_tcga_pan_can_atlas_2018	7128	censored	0.99986	0.328764
TCGA-AN-A0FV	brca_tcga_pan_can_atlas_2018	7127	censored	0.99986	0.328764
TCGA-AN-A0FX	brca_tcga_pan_can_atlas_2018	7126	censored	0.99986	0.328764
TCGA-AN-A0FY	brca_tcga_pan_can_atlas_2018	7125	censored	0.99986	0.328764
TCGA-AN-A0FZ	brca_tcga_pan_can_atlas_2018	7124	censored	0.99986	0.328764
TCGA-AN-A0XN	brca_tcga_pan_can_atlas_2018	7123	censored	0.99986	0.328764
TCGA-AN-A0XR	brca_tcga_pan_can_atlas_2018	7122	censored	0.99986	0.328764
TCGA-AN-A0XS	brca_tcga_pan_can_atlas_2018	7121	censored	0.99986	0.328764
TCGA-AN-A0XT	brca_tcga_pan_can_atlas_2018	7120	censored	0.99986	0.328764
TCGA-AN-A0XU	brca_tcga_pan_can_atlas_2018	7119	censored	0.99986	0.328764
TCGA-AN-A03X	brca_tcga	7118	censored	0.99986	0.33
TCGA-AN-A03Y	brca_tcga	7117	censored	0.99986	0.33
TCGA-AN-A0AS	brca_tcga	7116	censored	0.99986	0.33
TCGA-AN-A0FV	brca_tcga	7115	censored	0.99986	0.33
TCGA-AN-A0AT	brca_tcga	7114	censored	0.99986	0.33
TCGA-AN-A0FX	brca_tcga	7113	censored	0.99986	0.33
TCGA-AN-A0FY	brca_tcga	7112	censored	0.99986	0.33
TCGA-AN-A0FZ	brca_tcga	7111	censored	0.99986	0.33
TCGA-AN-A0XN	brca_tcga	7110	censored	0.99986	0.33
TCGA-AN-A0XR	brca_tcga	7109	censored	0.99986	0.33
TCGA-AN-A0XS	brca_tcga	7108	censored	0.99986	0.33
TCGA-AN-A0XT	brca_tcga	7107	censored	0.99986	0.33
TCGA-AN-A0XU	brca_tcga	7106	censored	0.99986	0.33
TCGA-AN-A0XU	brca_tcga_pub2015	7105	censored	0.99986	0.33
TCGA-AN-A0FV	brca_tcga_pub2015	7104	censored	0.99986	0.33
TCGA-AN-A0FY	brca_tcga_pub2015	7103	censored	0.99986	0.33
TCGA-AN-A0FZ	brca_tcga_pub2015	7102	censored	0.99986	0.33
TCGA-AN-A0FX	brca_tcga_pub2015	7101	censored	0.99986	0.33
TCGA-AN-A0AT	brca_tcga_pub2015	7100	censored	0.99986	0.33
TCGA-AN-A0AS	brca_tcga_pub2015	7099	censored	0.99986	0.33
TCGA-AN-A0AT	brca_tcga_pub	7098	censored	0.99986	0.33
TCGA-AN-A0FX	brca_tcga_pub	7097	censored	0.99986	0.33
TCGA-AN-A0XU	brca_tcga_pub	7096	censored	0.99986	0.33
TCGA-AN-A0FV	brca_tcga_pub	7095	censored	0.99986	0.33
TCGA-AN-A03X	brca_tcga_pub	7094	censored	0.99986	0.33
TCGA-AN-A046	brca_tcga_pub	7093	censored	0.99986	0.33
TCGA-AN-A0FZ	brca_tcga_pub	7092	censored	0.99986	0.33
TCGA-AN-A0XL	brca_tcga_pub	7091	censored	0.99986	0.33
TCGA-AN-A0XN	brca_tcga_pub	7090	censored	0.99986	0.33
TCGA-AN-A0XS	brca_tcga_pub	7089	censored	0.99986	0.33
TCGA-AN-A0XT	brca_tcga_pub	7088	censored	0.99986	0.33
TCGA-AN-A03Y	brca_tcga_pub	7087	censored	0.99986	0.33
TCGA-AN-A0FY	brca_tcga_pub	7086	censored	0.99986	0.33
TCGA-AN-A0XR	brca_tcga_pub	7085	censored	0.99986	0.33
TCGA-E9-A24A	brca_tcga_pub	7084	censored	0.99986	0.33
TCGA-AN-A0FW	brca_tcga	7083	censored	0.99986	0.36
TCGA-AN-A0FW	brca_tcga_pub2015	7082	censored	0.99986	0.36
TCGA-AN-A0FW	brca_tcga_pub	7081	censored	0.99986	0.36
TCGA-C8-A26X	brca_tcga_pub	7080	censored	0.99986	0.36
TCGA-AN-A0FW	brca_tcga_pan_can_atlas_2018	7079	censored	0.99986	0.36164
TCGA-E9-A247	brca_tcga_pub	7078	censored	0.99986	0.39
TCGA-C8-A26Y	brca_tcga_pub	7077	censored	0.99986	0.43
TCGA-E2-A1IL	brca_tcga_pub	7076	censored	0.99986	0.46
TCGA-E9-A1RH	brca_tcga_pub	7075	censored	0.99986	0.46
TCGA-AR-A0TX	brca_tcga_pub	7074	censored	0.99986	0.49
TCGA-D8-A27W	brca_tcga_pub	7073	censored	0.99986	0.49
TCGA-AN-A0G0	brca_tcga_pan_can_atlas_2018	7072	censored	0.99986	0.526022
TCGA-AN-A0G0	brca_tcga	7071	censored	0.99986	0.53
TCGA-AN-A0G0	brca_tcga_pub	7070	censored	0.99986	0.53
TCGA-AO-A1KS	brca_tcga_pub	7069	censored	0.99986	0.53
TCGA-E9-A226	brca_tcga_pub	7068	censored	0.99986	0.53
TCGA-D8-A1XS	brca_tcga_pub	7067	censored	0.99986	0.59
TCGA-D8-A1JA	brca_tcga_pub	7066	censored	0.99986	0.59
TCGA-AN-A049	brca_tcga	7065	censored	0.99986	0.62
TCGA-AN-A049	brca_tcga_pub	7064	censored	0.99986	0.62
TCGA-E9-A1R2	brca_tcga_pub	7063	censored	0.99986	0.62
TCGA-AN-A049	brca_tcga_pan_can_atlas_2018	7062	censored	0.99986	0.624651
TCGA-E9-A1RD	brca_tcga_pub	7061	censored	0.99986	0.66
TCGA-E9-A244	brca_tcga_pub	7060	censored	0.99986	0.66
TCGA-D8-A1JI	brca_tcga_pub	7059	censored	0.99986	0.69
TCGA-E9-A1RB	brca_tcga_pub	7058	censored	0.99986	0.69
TCGA-E9-A248	brca_tcga_pub	7057	censored	0.99986	0.69
P-0005158	breast_msk_2018	7056	censored	0.99986	0.7
P-0006456	breast_msk_2018	7055	censored	0.99986	0.7
P-0018963	breast_msk_2018	7054	censored	0.99986	0.7
TCGA-BH-A202	brca_tcga_pub	7053	censored	0.99986	0.72
TCGA-D8-A27P	brca_tcga_pub	7052	censored	0.99986	0.72
MB-0627	brca_metabric	7051	censored	0.99986	0.766667
TCGA-E9-A5FL	brca_tcga_pan_can_atlas_2018	7050	censored	0.99986	0.789032
TCGA-E9-A5FL	brca_tcga	7049	censored	0.99986	0.79
TCGA-E9-A227	brca_tcga_pub	7048	censored	0.99986	0.79
P-0018640	breast_msk_2018	7047	censored	0.99986	0.8
TCGA-E9-A245	brca_tcga_pub	7046	censored	0.99986	0.82
TCGA-AR-A24P	brca_tcga_pub	7045	censored	0.99986	0.85
TCGA-E9-A245	brca_tcga_pan_can_atlas_2018	7044	censored	0.99986	0.854785
P-0005292	breast_msk_2018	7043	censored	0.99986	0.9
P-0018642	breast_msk_2018	7042	censored	0.99986	0.9
P-0018728	breast_msk_2018	7041	censored	0.99986	0.9
P-0018799	breast_msk_2018	7040	censored	0.99986	0.9
TCGA-E9-A249	brca_tcga_pub	7039	censored	0.99986	0.92
TCGA-AC-A23C	brca_tcga_pub	7038	censored	0.99986	0.95
TCGA-E9-A1R4	brca_tcga_pub	7037	censored	0.99986	0.95
TCGA-E9-A1RA	brca_tcga_pub	7036	censored	0.99986	0.95
TCGA-A8-A08A	brca_tcga_pan_can_atlas_2018	7035	censored	0.99986	0.986291
TCGA-A8-A08R	brca_tcga_pan_can_atlas_2018	7034	censored	0.99986	0.986291
TCGA-A8-A09W	brca_tcga_pan_can_atlas_2018	7033	censored	0.99986	0.986291
TCGA-A8-A0A7	brca_tcga_pan_can_atlas_2018	7032	censored	0.99986	0.986291
TCGA-A8-A08A	brca_tcga	7031	censored	0.99986	0.99
TCGA-A8-A09W	brca_tcga	7030	censored	0.99986	0.99
TCGA-A8-A0A7	brca_tcga	7029	censored	0.99986	0.99
TCGA-A8-A0A7	brca_tcga_pub2015	7028	censored	0.99986	0.99
TCGA-A8-A08R	brca_tcga_pub	7027	censored	0.99986	0.99
TCGA-A8-A0A7	brca_tcga_pub	7026	censored	0.99986	0.99
TCGA-A8-A08A	brca_tcga_pub	7025	censored	0.99986	0.99
TCGA-A8-A09W	brca_tcga_pub	7024	censored	0.99986	0.99
P-0015633	breast_msk_2018	7023	censored	0.99986	1
P-0018655	breast_msk_2018	7022	censored	0.99986	1
P-0018726	breast_msk_2018	7021	censored	0.99986	1
TCGA-A8-A06Q	brca_tcga_pan_can_atlas_2018	7020	censored	0.99986	1.01917
TCGA-A8-A06Z	brca_tcga_pan_can_atlas_2018	7019	censored	0.99986	1.01917
TCGA-A8-A09C	brca_tcga_pan_can_atlas_2018	7018	censored	0.99986	1.01917
TCGA-A8-A09N	brca_tcga_pan_can_atlas_2018	7017	censored	0.99986	1.01917
TCGA-A8-A06Z	brca_tcga	7016	censored	0.99986	1.02
TCGA-A8-A09C	brca_tcga	7015	censored	0.99986	1.02
TCGA-A8-A09N	brca_tcga	7014	censored	0.99986	1.02
TCGA-A8-A06Q	brca_tcga	7013	censored	0.99986	1.02
TCGA-A8-A06Q	brca_tcga_pub2015	7012	censored	0.99986	1.02
TCGA-A8-A06Z	brca_tcga_pub2015	7011	censored	0.99986	1.02
TCGA-A8-A09C	brca_tcga_pub2015	7010	censored	0.99986	1.02
TCGA-A8-A09N	brca_tcga_pub2015	7009	censored	0.99986	1.02
TCGA-A8-A06Q	brca_tcga_pub	7008	censored	0.99986	1.02
TCGA-A8-A06Z	brca_tcga_pub	7007	censored	0.99986	1.02
TCGA-A8-A09C	brca_tcga_pub	7006	censored	0.99986	1.02
TCGA-A8-A09N	brca_tcga_pub	7005	censored	0.99986	1.02
P-0016141	breast_msk_2018	7004	censored	0.99986	1.1
P-0018675	breast_msk_2018	7003	censored	0.99986	1.1
TCGA-AC-A8OQ	brca_tcga_pan_can_atlas_2018	7002	censored	0.99986	1.1178
TCGA-E9-A1RD	brca_tcga_pan_can_atlas_2018	7001	censored	0.99986	1.1178
TCGA-E9-A1RD	brca_tcga	7000	censored	0.99986	1.12
TCGA-AC-A8OQ	brca_tcga	6999	censored	0.99986	1.12
TCGA-E9-A1RD	brca_tcga_pub2015	6998	censored	0.99986	1.12
TCGA-E2-A15K	brca_tcga_pub	6997	censored	0.99986	1.12
TCGA-E9-A1R7	brca_tcga_pub	6996	censored	0.99986	1.12
TCGA-E9-A1RG	brca_tcga_pub	6995	censored	0.99986	1.15
P-0018727	breast_msk_2018	6994	censored	0.99986	1.2
MB-0880	brca_metabric	6993	censored	0.99986	1.23333
TCGA-E9-A1RF	brca_tcga_pub	6992	censored	0.99986	1.25
MB-0125	brca_metabric	6991	censored	0.99986	1.26667
P-0018119	breast_msk_2018	6990	censored	0.99986	1.3
TCGA-AC-A8OR	brca_tcga	6989	censored	0.99986	1.31
TCGA-AC-A8OR	brca_tcga_pan_can_atlas_2018	6988	censored	0.99986	1.31505
TCGA-E2-A15H	brca_tcga_pub	6987	censored	0.99986	1.38
TCGA-E9-A1R5	brca_tcga_pub	6986	censored	0.99986	1.38
P-0002445	breast_msk_2018	6985	censored	0.99986	1.4
P-0018520	breast_msk_2018	6984	censored	0.99986	1.4
P-0018850	breast_msk_2018	6983	censored	0.99986	1.4
TCGA-E9-A243	brca_tcga_pub	6982	censored	0.99986	1.41
MB-0374	brca_metabric	6981	censored	0.99986	1.43333
TCGA-E9-A1RE	brca_tcga_pub	6980	censored	0.99986	1.54
TCGA-E9-A1RI	brca_tcga_pub	6979	censored	0.99986	1.58
P-0014324	breast_msk_2018	6978	censored	0.99986	1.6
P-0018052	breast_msk_2018	6977	censored	0.99986	1.6
P-0018213	breast_msk_2018	6976	censored	0.99986	1.6
P-0019037	breast_msk_2018	6975	censored	0.99986	1.6
TCGA-D8-A27P	brca_tcga	6974	censored	0.99986	1.61
TCGA-D8-A27P	brca_tcga_pub2015	6973	censored	0.99986	1.61
TCGA-D8-A27P	brca_tcga_pan_can_atlas_2018	6972	censored	0.99986	1.61094
TCGA-AC-A6NO	brca_tcga_pan_can_atlas_2018	6971	censored	0.99986	1.67669
TCGA-AC-A6NO	brca_tcga	6970	censored	0.99986	1.68
P-0013715	breast_msk_2018	6969	censored	0.99986	1.7
P-0018046	breast_msk_2018	6968	censored	0.99986	1.7
TCGA-AN-A04D	brca_tcga_pub	6967	censored	0.99986	1.71
MB-0148	brca_metabric	6966	censored	0.99986	1.76667
TCGA-AN-A04C	brca_tcga	6965	censored	0.99986	1.77
TCGA-AN-A04C	brca_tcga_pub	6964	censored	0.99986	1.77
TCGA-AN-A04C	brca_tcga_pan_can_atlas_2018	6963	censored	0.99986	1.77532
P-0017756	breast_msk_2018	6962	censored	0.99986	1.8
TCGA-E9-A248	brca_tcga_pan_can_atlas_2018	6961	censored	0.99986	1.9397
TCGA-E9-A248	brca_tcga	6960	censored	0.99986	1.94
TCGA-E9-A248	brca_tcga_pub2015	6959	censored	0.99986	1.94
MB-5525	brca_metabric	6958	censored	0.99986	2
TCGA-BH-A18G	brca_tcga_pub	6957	censored	0.99986	2
P-0000669	breast_msk_2018	6956	deceased	0.999717	2
P-0012976	breast_msk_2018	6955	censored	0.999717	2
TCGA-OK-A5Q2	brca_tcga	6954	censored	0.999717	2.1
TCGA-A7-A26H	brca_tcga_pub	6953	censored	0.999717	2.1
TCGA-E9-A1R3	brca_tcga_pub	6952	censored	0.999717	2.1
P-0015710	breast_msk_2018	6951	censored	0.999717	2.1
TCGA-OK-A5Q2	brca_tcga_pan_can_atlas_2018	6950	censored	0.999717	2.10409
TCGA-A7-A26J	brca_tcga_pub	6949	censored	0.999717	2.2
MB-6092	brca_metabric	6948	deceased	0.999573	2.3
TCGA-AC-A8OS	brca_tcga	6947	censored	0.999573	2.3
P-0017442	breast_msk_2018	6946	censored	0.999573	2.3
TCGA-AC-A8OS	brca_tcga_pan_can_atlas_2018	6945	censored	0.999573	2.30134
TCGA-BH-A0HL	brca_tcga_pan_can_atlas_2018	6944	censored	0.999573	2.3671
TCGA-BH-A0HL	brca_tcga	6943	censored	0.999573	2.37
TCGA-BH-A0HL	brca_tcga_pub	6942	censored	0.999573	2.37
TCGA-AC-A23E	brca_tcga_pub	6941	censored	0.999573	2.37
TCGA-D8-A1Y2	brca_tcga_pub	6940	censored	0.999573	2.37
MB-0117	brca_metabric	6939	censored	0.999573	2.4
TCGA-D8-A27V	brca_tcga_pub	6938	censored	0.999573	2.4
TCGA-BH-A0HO	brca_tcga_pan_can_atlas_2018	6937	censored	0.999573	2.4986
MB-0522	brca_metabric	6936	censored	0.999573	2.5
TCGA-BH-A0HO	brca_tcga	6935	censored	0.999573	2.5
TCGA-BH-A0HO	brca_tcga_pub2015	6934	censored	0.999573	2.5
TCGA-BH-A0HO	brca_tcga_pub	6933	censored	0.999573	2.5
P-0014976	breast_msk_2018	6932	censored	0.999573	2.5
P-0017898	breast_msk_2018	6931	censored	0.999573	2.5
TCGA-BH-A0DS	brca_tcga_pub	6930	censored	0.999573	2.53
MB-5373	brca_metabric	6929	censored	0.999573	2.53333
MB-5475	brca_metabric	6928	deceased	0.999428	2.53333
TCGA-E9-A1R3	brca_tcga	6927	censored	0.999428	2.56
TCGA-AQ-A54N	brca_tcga	6926	censored	0.999428	2.56
TCGA-BH-A0DS	brca_tcga	6925	censored	0.999428	2.56
TCGA-E9-A1R3	brca_tcga_pub2015	6924	censored	0.999428	2.56
TCGA-BH-A0DS	brca_tcga_pub2015	6923	censored	0.999428	2.56
TCGA-AQ-A54N	brca_tcga_pub2015	6922	censored	0.999428	2.56
TCGA-AQ-A54N	brca_tcga_pan_can_atlas_2018	6921	censored	0.999428	2.56436
TCGA-BH-A0DS	brca_tcga_pan_can_atlas_2018	6920	censored	0.999428	2.56436
TCGA-E9-A1R3	brca_tcga_pan_can_atlas_2018	6919	censored	0.999428	2.56436
TCGA-HN-A2NL	brca_tcga_pan_can_atlas_2018	6918	censored	0.999428	2.59723
TCGA-HN-A2NL	brca_tcga	6917	censored	0.999428	2.6
TCGA-HN-A2NL	brca_tcga_pub2015	6916	censored	0.999428	2.6
TCGA-LL-A6FQ	brca_tcga	6915	censored	0.999428	2.63
TCGA-LL-A6FQ	brca_tcga_pan_can_atlas_2018	6914	censored	0.999428	2.63011
TCGA-AC-A23H	brca_tcga_pub	6913	censored	0.999428	2.66
TCGA-D8-A1XC	brca_tcga_pub	6912	censored	0.999428	2.66
TCGA-D8-A1XY	brca_tcga_pub	6911	censored	0.999428	2.66
P-0018844	breast_msk_2018	6910	censored	0.999428	2.7
P-0018891	breast_msk_2018	6909	censored	0.999428	2.7
TCGA-AR-A24P	brca_tcga	6908	censored	0.999428	2.76
TCGA-AR-A24P	brca_tcga_pub2015	6907	censored	0.999428	2.76
TCGA-E9-A1R6	brca_tcga_pub	6906	censored	0.999428	2.76
TCGA-AR-A24P	brca_tcga_pan_can_atlas_2018	6905	censored	0.999428	2.76161
TCGA-D8-A1X7	brca_tcga_pub	6904	censored	0.999428	2.79
P-0005165	breast_msk_2018	6903	censored	0.999428	2.8
P-0009482	breast_msk_2018	6902	censored	0.999428	2.8
P-0016205	breast_msk_2018	6901	censored	0.999428	2.8
MB-0156	brca_metabric	6900	censored	0.999428	2.86667
P-0015509	breast_msk_2018	6899	censored	0.999428	2.9
P-0018917	breast_msk_2018	6898	censored	0.999428	2.9
TCGA-AN-A04A	brca_tcga_pub	6897	censored	0.999428	2.92
TCGA-AN-A04A	brca_tcga_pan_can_atlas_2018	6896	censored	0.999428	2.95887
TCGA-AN-A04A	brca_tcga	6895	censored	0.999428	2.96
TCGA-D8-A27R	brca_tcga_pub	6894	censored	0.999428	2.96
P-0015580	breast_msk_2018	6893	censored	0.999428	3
P-0018895	breast_msk_2018	6892	censored	0.999428	3
TCGA-E9-A1R5	brca_tcga	6891	censored	0.999428	3.02
TCGA-E9-A1R5	brca_tcga_pub2015	6890	censored	0.999428	3.02
TCGA-E9-A1R5	brca_tcga_pan_can_atlas_2018	6889	censored	0.999428	3.02462
P-0015520	breast_msk_2018	6888	censored	0.999428	3.1
P-0018596	breast_msk_2018	6887	censored	0.999428	3.1
P-0018789	breast_msk_2018	6886	censored	0.999428	3.1
P-0018829	breast_msk_2018	6885	censored	0.999428	3.1
P-0018888	breast_msk_2018	6884	censored	0.999428	3.1
TCGA-D8-A1JF	brca_tcga_pub	6883	censored	0.999428	3.15
P-0014040	breast_msk_2018	6882	censored	0.999428	3.2
P-0015852	breast_msk_2018	6881	censored	0.999428	3.2
P-0015933	breast_msk_2018	6880	censored	0.999428	3.2
P-0017045	breast_msk_2018	6879	censored	0.999428	3.2
P-0018152	breast_msk_2018	6878	censored	0.999428	3.2
P-0018898	breast_msk_2018	6877	censored	0.999428	3.2
TCGA-BH-A0DQ	brca_tcga	6876	censored	0.999428	3.22
TCGA-BH-A0DQ	brca_tcga_pub2015	6875	censored	0.999428	3.22
TCGA-BH-A0DQ	brca_tcga_pub	6874	censored	0.999428	3.22
TCGA-BH-A0DQ	brca_tcga_pan_can_atlas_2018	6873	censored	0.999428	3.22188
P-0014298	breast_msk_2018	6872	censored	0.999428	3.3
P-0016133	breast_msk_2018	6871	censored	0.999428	3.3
P-0017320	breast_msk_2018	6870	censored	0.999428	3.3
P-0018901	breast_msk_2018	6869	censored	0.999428	3.3
MB-0285	brca_metabric	6868	censored	0.999428	3.36667
P-0014676	breast_msk_2018	6867	censored	0.999428	3.4
P-0015943	breast_msk_2018	6866	censored	0.999428	3.4
P-0018073	breast_msk_2018	6865	censored	0.999428	3.4
P-0018125	breast_msk_2018	6864	censored	0.999428	3.4
P-0018610	breast_msk_2018	6863	censored	0.999428	3.4
MB-6281	brca_metabric	6862	deceased	0.999283	3.5
P-0015907	breast_msk_2018	6861	censored	0.999283	3.5
P-0017096	breast_msk_2018	6860	censored	0.999283	3.5
P-0017770	breast_msk_2018	6859	censored	0.999283	3.5
P-0018120	breast_msk_2018	6858	censored	0.999283	3.5
P-0018840	breast_msk_2018	6857	censored	0.999283	3.5
P-0018896	breast_msk_2018	6856	censored	0.999283	3.5
TCGA-D8-A1JK	brca_tcga_pub	6855	censored	0.999283	3.58
P-0016811	breast_msk_2018	6854	censored	0.999283	3.6
P-0016813	breast_msk_2018	6853	censored	0.999283	3.6
P-0017684	breast_msk_2018	6852	censored	0.999283	3.6
P-0017957	breast_msk_2018	6851	censored	0.999283	3.6
P-0018401	breast_msk_2018	6850	censored	0.999283	3.6
P-0003072	breast_msk_2018	6849	censored	0.999283	3.7
P-0014493	breast_msk_2018	6848	censored	0.999283	3.7
P-0015039	breast_msk_2018	6847	censored	0.999283	3.7
P-0018018	breast_msk_2018	6846	censored	0.999283	3.7
TCGA-D8-A141	brca_tcga_pub	6845	censored	0.999283	3.71
TCGA-A2-A25F	brca_tcga_pub	6844	censored	0.999283	3.71
MB-0173	brca_metabric	6843	censored	0.999283	3.76667
TCGA-D8-A1Y1	brca_tcga_pub	6842	censored	0.999283	3.78
P-0015381	breast_msk_2018	6841	censored	0.999283	3.8
P-0018273	breast_msk_2018	6840	censored	0.999283	3.8
P-0018447	breast_msk_2018	6839	censored	0.999283	3.8
TCGA-UU-A93S	brca_tcga	6838	deceased	0.999137	3.81
TCGA-UU-A93S	brca_tcga_pan_can_atlas_2018	6837	deceased	0.998991	3.81366
TCGA-D8-A1XW	brca_tcga_pub	6836	censored	0.998991	3.84
TCGA-E2-A1IL	brca_tcga_pan_can_atlas_2018	6835	censored	0.998991	3.87941
TCGA-E2-A1IL	brca_tcga	6834	censored	0.998991	3.88
TCGA-E2-A1IL	brca_tcga_pub2015	6833	censored	0.998991	3.88
TCGA-D8-A27K	brca_tcga_pub	6832	censored	0.998991	3.88
P-0016135	breast_msk_2018	6831	censored	0.998991	3.9
P-0016620	breast_msk_2018	6830	censored	0.998991	3.9
TCGA-D8-A1XZ	brca_tcga_pub	6829	censored	0.998991	3.94
P-0015988	breast_msk_2018	6828	censored	0.998991	4
TCGA-A7-A26I	brca_tcga_pub	6827	censored	0.998991	4.01
TCGA-D8-A1Y3	brca_tcga_pub	6826	censored	0.998991	4.07
P-0015063	breast_msk_2018	6825	censored	0.998991	4.1
P-0015640	breast_msk_2018	6824	censored	0.998991	4.1
P-0015865	breast_msk_2018	6823	censored	0.998991	4.1
P-0017699	breast_msk_2018	6822	censored	0.998991	4.1
TCGA-D8-A27L	brca_tcga_pub	6821	censored	0.998991	4.11
MB-7078	brca_metabric	6820	deceased	0.998844	4.16667
TCGA-E2-A1IU	brca_tcga_pub	6819	censored	0.998844	4.17
P-0004057	breast_msk_2018	6818	censored	0.998844	4.2
P-0014643	breast_msk_2018	6817	censored	0.998844	4.2
P-0016665	breast_msk_2018	6816	censored	0.998844	4.2
P-0015535	breast_msk_2018	6815	censored	0.998844	4.3
P-0015938	breast_msk_2018	6814	censored	0.998844	4.3
P-0016468	breast_msk_2018	6813	censored	0.998844	4.3
P-0017740	breast_msk_2018	6812	censored	0.998844	4.3
P-0017970	breast_msk_2018	6811	censored	0.998844	4.3
P-0018342	breast_msk_2018	6810	censored	0.998844	4.3
P-0019054	breast_msk_2018	6809	censored	0.998844	4.3
TCGA-A2-A1G6	brca_tcga_pub	6808	censored	0.998844	4.34
TCGA-BH-A0E0	brca_tcga_pub	6807	censored	0.998844	4.37
TCGA-BH-A0E0	brca_tcga	6806	censored	0.998844	4.4
TCGA-BH-A0E0	brca_tcga_pub2015	6805	censored	0.998844	4.4
P-0008570	breast_msk_2018	6804	censored	0.998844	4.4
P-0014730	breast_msk_2018	6803	censored	0.998844	4.4
P-0016466	breast_msk_2018	6802	censored	0.998844	4.4
P-0016661	breast_msk_2018	6801	censored	0.998844	4.4
TCGA-BH-A0E0	brca_tcga_pan_can_atlas_2018	6800	censored	0.998844	4.40543
MB-0314	brca_metabric	6799	deceased	0.998697	4.43333
TCGA-D8-A27T	brca_tcga_pub	6798	censored	0.998697	4.44
P-0015598	breast_msk_2018	6797	censored	0.998697	4.5
P-0015982	breast_msk_2018	6796	censored	0.998697	4.5
P-0017656	breast_msk_2018	6795	censored	0.998697	4.5
P-0017846	breast_msk_2018	6794	censored	0.998697	4.5
P-0017930	breast_msk_2018	6793	censored	0.998697	4.5
P-0018552	breast_msk_2018	6792	censored	0.998697	4.5
P-0019073	breast_msk_2018	6791	censored	0.998697	4.5
TCGA-AQ-A1H3	brca_tcga_pub	6790	censored	0.998697	4.53
TCGA-EW-A1J2	brca_tcga_pub	6789	censored	0.998697	4.57
TCGA-EW-A1PE	brca_tcga_pub	6788	censored	0.998697	4.57
TCGA-EW-A1PF	brca_tcga_pub	6787	censored	0.998697	4.57
TCGA-EW-A1PH	brca_tcga_pub	6786	censored	0.998697	4.57
TCGA-AN-A0FF	brca_tcga_pub	6785	censored	0.998697	4.6
TCGA-D8-A27H	brca_tcga_pub	6784	censored	0.998697	4.6
P-0012318	breast_msk_2018	6783	censored	0.998697	4.6
P-0006874	breast_msk_2018	6782	censored	0.998697	4.7
P-0015569	breast_msk_2018	6781	censored	0.998697	4.7
P-0017331	breast_msk_2018	6780	censored	0.998697	4.7
P-0017564	breast_msk_2018	6779	censored	0.998697	4.7
P-0017614	breast_msk_2018	6778	censored	0.998697	4.7
P-0018287	breast_msk_2018	6777	censored	0.998697	4.7
TCGA-D8-A27M	brca_tcga_pub	6776	censored	0.998697	4.73
TCGA-D8-A27N	brca_tcga_pub	6775	censored	0.998697	4.76
TCGA-D8-A1XV	brca_tcga_pub	6774	censored	0.998697	4.8
P-0014532	breast_msk_2018	6773	censored	0.998697	4.8
P-0014811	breast_msk_2018	6772	censored	0.998697	4.8
P-0015582	breast_msk_2018	6771	censored	0.998697	4.8
P-0016479	breast_msk_2018	6770	censored	0.998697	4.8
P-0016499	breast_msk_2018	6769	censored	0.998697	4.8
P-0017172	breast_msk_2018	6768	censored	0.998697	4.8
P-0018053	breast_msk_2018	6767	censored	0.998697	4.8
MB-7186	brca_metabric	6766	censored	0.998697	4.86667
TCGA-BH-A18G	brca_tcga	6765	censored	0.998697	4.89
TCGA-BH-A18G	brca_tcga_pub2015	6764	censored	0.998697	4.89
TCGA-BH-A18G	brca_tcga_pan_can_atlas_2018	6763	censored	0.998697	4.89858
TCGA-D8-A1XU	brca_tcga_pub	6762	censored	0.998697	4.9
P-0009630	breast_msk_2018	6761	censored	0.998697	4.9
P-0016936	breast_msk_2018	6760	censored	0.998697	4.9
P-0012153	breast_msk_2018	6759	censored	0.998697	5
P-0015187	breast_msk_2018	6758	censored	0.998697	5
P-0016884	breast_msk_2018	6757	censored	0.998697	5
P-0017767	breast_msk_2018	6756	censored	0.998697	5
TCGA-D8-A1XD	brca_tcga_pub	6755	censored	0.998697	5.09
P-0013901	breast_msk_2018	6754	censored	0.998697	5.1
P-0013916	breast_msk_2018	6753	censored	0.998697	5.1
TCGA-A2-A0CU	brca_tcga_pub	6752	deceased	0.998549	5.16
TCGA-A2-A0CU	brca_tcga	6751	deceased	0.998401	5.19
TCGA-A2-A0CU	brca_tcga_pub2015	6750	deceased	0.998253	5.19
TCGA-A2-A0CU	brca_tcga_pan_can_atlas_2018	6749	deceased	0.998106	5.19446
P-0017062	breast_msk_2018	6748	censored	0.998106	5.2
P-0017818	breast_msk_2018	6747	censored	0.998106	5.2
TCGA-BH-A6R9	brca_tcga	6746	censored	0.998106	5.26
TCGA-AR-A0TR	brca_tcga	6745	deceased	0.997958	5.26
TCGA-AR-A0TR	brca_tcga_pub	6744	deceased	0.99781	5.26
TCGA-AR-A0TR	brca_tcga_pan_can_atlas_2018	6743	deceased	0.997662	5.26022
TCGA-BH-A6R9	brca_tcga_pan_can_atlas_2018	6742	censored	0.997662	5.26022
TCGA-AQ-A0Y5	brca_tcga_pub	6741	deceased	0.997514	5.29
P-0014179	breast_msk_2018	6740	censored	0.997514	5.3
P-0014581	breast_msk_2018	6739	censored	0.997514	5.3
P-0015739	breast_msk_2018	6738	censored	0.997514	5.3
TCGA-AN-A0XV	brca_tcga	6737	censored	0.997514	5.32
TCGA-AN-A0XV	brca_tcga_pub	6736	censored	0.997514	5.32
TCGA-AN-A0XV	brca_tcga_pan_can_atlas_2018	6735	censored	0.997514	5.32597
TCGA-AN-A0XL	brca_tcga	6734	censored	0.997514	5.35
TCGA-AN-A0XL	brca_tcga_pan_can_atlas_2018	6733	censored	0.997514	5.35885
P-0014692	breast_msk_2018	6732	censored	0.997514	5.4
P-0016730	breast_msk_2018	6731	censored	0.997514	5.4
P-0016924	breast_msk_2018	6730	censored	0.997514	5.4
P-0017031	breast_msk_2018	6729	censored	0.997514	5.4
P-0017160	breast_msk_2018	6728	censored	0.997514	5.4
P-0017193	breast_msk_2018	6727	censored	0.997514	5.4
P-0017323	breast_msk_2018	6726	censored	0.997514	5.4
P-0017359	breast_msk_2018	6725	censored	0.997514	5.4
P-0017694	breast_msk_2018	6724	censored	0.997514	5.4
P-0017742	breast_msk_2018	6723	censored	0.997514	5.4
P-0018662	breast_msk_2018	6722	censored	0.997514	5.4
MB-0171	brca_metabric	6721	censored	0.997514	5.43333
TCGA-D8-A1Y0	brca_tcga_pub	6720	censored	0.997514	5.45
TCGA-D8-A1JP	brca_tcga_pub	6719	censored	0.997514	5.49
MB-2954	brca_metabric	6718	deceased	0.997365	5.5
P-0014369	breast_msk_2018	6717	censored	0.997365	5.5
P-0015468	breast_msk_2018	6716	censored	0.997365	5.5
P-0016364	breast_msk_2018	6715	censored	0.997365	5.5
P-0016975	breast_msk_2018	6714	censored	0.997365	5.5
P-0017036	breast_msk_2018	6713	censored	0.997365	5.5
P-0017118	breast_msk_2018	6712	censored	0.997365	5.5
TCGA-D8-A1XR	brca_tcga_pub	6711	censored	0.997365	5.52
TCGA-BH-A0RX	brca_tcga	6710	censored	0.997365	5.58
TCGA-AN-A0XW	brca_tcga	6709	censored	0.997365	5.58
TCGA-BH-A0RX	brca_tcga_pub2015	6708	censored	0.997365	5.58
TCGA-AN-A0XW	brca_tcga_pan_can_atlas_2018	6707	censored	0.997365	5.58898
TCGA-BH-A0RX	brca_tcga_pan_can_atlas_2018	6706	censored	0.997365	5.58898
TCGA-BH-A0RX	brca_tcga_pub	6705	censored	0.997365	5.59
TCGA-AN-A0XW	brca_tcga_pub	6704	censored	0.997365	5.59
P-0014434	breast_msk_2018	6703	censored	0.997365	5.6
P-0015355	breast_msk_2018	6702	censored	0.997365	5.6
P-0016264	breast_msk_2018	6701	censored	0.997365	5.6
P-0016943	breast_msk_2018	6700	censored	0.997365	5.6
TCGA-D8-A1X5	brca_tcga_pub	6699	censored	0.997365	5.62
TCGA-AQ-A0Y5	brca_tcga	6698	deceased	0.997216	5.65
TCGA-AN-A0FF	brca_tcga	6697	censored	0.997216	5.65
TCGA-AQ-A0Y5	brca_tcga_pub2015	6696	deceased	0.997067	5.65
TCGA-AN-A0FF	brca_tcga_pub2015	6695	censored	0.997067	5.65
TCGA-AN-A0FF	brca_tcga_pan_can_atlas_2018	6694	censored	0.997067	5.65473
TCGA-AQ-A0Y5	brca_tcga_pan_can_atlas_2018	6693	deceased	0.996918	5.65473
P-0016769	breast_msk_2018	6692	censored	0.996918	5.7
P-0016802	breast_msk_2018	6691	censored	0.996918	5.7
P-0017156	breast_msk_2018	6690	censored	0.996918	5.7
P-0017481	breast_msk_2018	6689	censored	0.996918	5.7
TCGA-EW-A1PD	brca_tcga_pub	6688	censored	0.996918	5.72
TCGA-BH-A0W4	brca_tcga_pub	6687	censored	0.996918	5.75
P-0003332	breast_msk_2018	6686	deceased	0.996769	5.8
P-0016593	breast_msk_2018	6685	censored	0.996769	5.8
P-0016866	breast_msk_2018	6684	censored	0.996769	5.8
P-0017032	breast_msk_2018	6683	censored	0.996769	5.8
P-0017099	breast_msk_2018	6682	censored	0.996769	5.8
TCGA-D8-A1XQ	brca_tcga_pub	6681	censored	0.996769	5.82
MB-0278	brca_metabric	6680	deceased	0.99662	5.83333
TCGA-BH-A0HK	brca_tcga	6679	censored	0.99662	5.85
TCGA-BH-A0HK	brca_tcga_pub2015	6678	censored	0.99662	5.85
TCGA-BH-A0HK	brca_tcga_pub	6677	censored	0.99662	5.85
TCGA-D8-A1JC	brca_tcga_pub	6676	censored	0.99662	5.85
TCGA-BH-A0HK	brca_tcga_pan_can_atlas_2018	6675	censored	0.99662	5.85199
P-0016739	breast_msk_2018	6674	censored	0.99662	5.9
P-0016747	breast_msk_2018	6673	censored	0.99662	5.9
P-0016794	breast_msk_2018	6672	censored	0.99662	5.9
P-0016804	breast_msk_2018	6671	censored	0.99662	5.9
P-0016893	breast_msk_2018	6670	censored	0.99662	5.9
P-0016947	breast_msk_2018	6669	censored	0.99662	5.9
P-0017098	breast_msk_2018	6668	censored	0.99662	5.9
P-0017261	breast_msk_2018	6667	censored	0.99662	5.9
P-0017362	breast_msk_2018	6666	censored	0.99662	5.9
P-0017581	breast_msk_2018	6665	censored	0.99662	5.9
P-0017590	breast_msk_2018	6664	censored	0.99662	5.9
TCGA-BH-A0W3	brca_tcga_pub	6663	censored	0.99662	5.91
TCGA-D8-A27E	brca_tcga_pub	6662	censored	0.99662	5.98
TCGA-AN-A0FT	brca_tcga_pub	6661	censored	0.99662	6.01
TCGA-AR-A0U1	brca_tcga_pub	6660	censored	0.99662	6.08
TCGA-D8-A27I	brca_tcga_pub	6659	censored	0.99662	6.08
P-0008489	breast_msk_2018	6658	deceased	0.99647	6.1
P-0016202	breast_msk_2018	6657	censored	0.99647	6.1
P-0016358	breast_msk_2018	6656	censored	0.99647	6.1
P-0016458	breast_msk_2018	6655	censored	0.99647	6.1
P-0016472	breast_msk_2018	6654	censored	0.99647	6.1
P-0016608	breast_msk_2018	6653	censored	0.99647	6.1
P-0016689	breast_msk_2018	6652	censored	0.99647	6.1
P-0016786	breast_msk_2018	6651	censored	0.99647	6.1
P-0016940	breast_msk_2018	6650	censored	0.99647	6.1
P-0017011	breast_msk_2018	6649	censored	0.99647	6.1
TCGA-E9-A1R4	brca_tcga	6648	censored	0.99647	6.11
TCGA-E9-A1R4	brca_tcga_pub2015	6647	censored	0.99647	6.11
TCGA-E9-A1R4	brca_tcga_pan_can_atlas_2018	6646	censored	0.99647	6.115
TCGA-D8-A1JG	brca_tcga_pub	6645	censored	0.99647	6.14
P-0013388	breast_msk_2018	6644	censored	0.99647	6.2
P-0014200	breast_msk_2018	6643	censored	0.99647	6.2
P-0015191	breast_msk_2018	6642	censored	0.99647	6.2
P-0016726	breast_msk_2018	6641	censored	0.99647	6.2
TCGA-EW-A2FW	brca_tcga_pub	6640	censored	0.99647	6.24
MB-0417	brca_metabric	6639	deceased	0.99632	6.26667
TCGA-AN-A0FS	brca_tcga_pub	6638	censored	0.99632	6.28
P-0000522	breast_msk_2018	6637	censored	0.99632	6.3
P-0014317	breast_msk_2018	6636	censored	0.99632	6.3
P-0014699	breast_msk_2018	6635	censored	0.99632	6.3
P-0014821	breast_msk_2018	6634	censored	0.99632	6.3
P-0016262	breast_msk_2018	6633	censored	0.99632	6.3
P-0016337	breast_msk_2018	6632	censored	0.99632	6.3
P-0016651	breast_msk_2018	6631	censored	0.99632	6.3
P-0016667	breast_msk_2018	6630	censored	0.99632	6.3
P-0016906	breast_msk_2018	6629	censored	0.99632	6.3
P-0007700	breast_msk_2018	6628	censored	0.99632	6.4
P-0010745	breast_msk_2018	6627	censored	0.99632	6.4
P-0014283	breast_msk_2018	6626	censored	0.99632	6.4
P-0014879	breast_msk_2018	6625	censored	0.99632	6.4
P-0015033	breast_msk_2018	6624	censored	0.99632	6.4
P-0016041	breast_msk_2018	6623	censored	0.99632	6.4
P-0016162	breast_msk_2018	6622	censored	0.99632	6.4
P-0016456	breast_msk_2018	6621	censored	0.99632	6.4
P-0016469	breast_msk_2018	6620	censored	0.99632	6.4
P-0016475	breast_msk_2018	6619	censored	0.99632	6.4
P-0016584	breast_msk_2018	6618	censored	0.99632	6.4
TCGA-AN-A0FD	brca_tcga_pub	6617	censored	0.99632	6.41
TCGA-AN-A0FD	brca_tcga	6616	censored	0.99632	6.44
TCGA-BH-A28Q	brca_tcga_pub	6615	censored	0.99632	6.44
TCGA-D8-A1XG	brca_tcga_pub	6614	censored	0.99632	6.44
TCGA-AN-A0FD	brca_tcga_pan_can_atlas_2018	6613	censored	0.99632	6.44376
TCGA-AC-A3EH	brca_tcga	6612	deceased	0.99617	6.47
TCGA-AC-A3EH	brca_tcga_pub2015	6611	deceased	0.996019	6.47
TCGA-AN-A0AL	brca_tcga_pub	6610	censored	0.996019	6.47
TCGA-AQ-A1H2	brca_tcga_pub	6609	censored	0.996019	6.47
TCGA-D8-A1XF	brca_tcga_pub	6608	censored	0.996019	6.47
TCGA-AC-A3EH	brca_tcga_pan_can_atlas_2018	6607	deceased	0.995868	6.47664
P-0005120	breast_msk_2018	6606	deceased	0.995717	6.5
P-0014685	breast_msk_2018	6605	censored	0.995717	6.5
P-0016357	breast_msk_2018	6604	censored	0.995717	6.5
P-0016442	breast_msk_2018	6603	censored	0.995717	6.5
TCGA-E9-A1RF	brca_tcga	6602	censored	0.995717	6.57
TCGA-E9-A1RF	brca_tcga_pub2015	6601	censored	0.995717	6.57
TCGA-E9-A1RF	brca_tcga_pan_can_atlas_2018	6600	censored	0.995717	6.57527
TCGA-D8-A1XB	brca_tcga_pub	6599	censored	0.995717	6.6
P-0014626	breast_msk_2018	6598	censored	0.995717	6.6
P-0015685	breast_msk_2018	6597	censored	0.995717	6.6
P-0015734	breast_msk_2018	6596	censored	0.995717	6.6
P-0015947	breast_msk_2018	6595	censored	0.995717	6.6
P-0015957	breast_msk_2018	6594	censored	0.995717	6.6
P-0016270	breast_msk_2018	6593	censored	0.995717	6.6
P-0016349	breast_msk_2018	6592	censored	0.995717	6.6
P-0016656	breast_msk_2018	6591	censored	0.995717	6.6
P-0016856	breast_msk_2018	6590	censored	0.995717	6.6
P-0012750	breast_msk_2018	6589	censored	0.995717	6.7
P-0012969	breast_msk_2018	6588	censored	0.995717	6.7
P-0015126	breast_msk_2018	6587	censored	0.995717	6.7
P-0015428	breast_msk_2018	6586	censored	0.995717	6.7
P-0015688	breast_msk_2018	6585	censored	0.995717	6.7
P-0014092	breast_msk_2018	6584	censored	0.995717	6.8
P-0014375	breast_msk_2018	6583	censored	0.995717	6.8
P-0015931	breast_msk_2018	6582	censored	0.995717	6.8
P-0016014	breast_msk_2018	6581	censored	0.995717	6.8
P-0016569	breast_msk_2018	6580	censored	0.995717	6.8
P-0016655	breast_msk_2018	6579	censored	0.995717	6.8
P-0017809	breast_msk_2018	6578	censored	0.995717	6.8
MB-7291	brca_metabric	6577	deceased	0.995566	6.83333
TCGA-A7-A26G	brca_tcga_pub	6576	censored	0.995566	6.87
TCGA-BH-A201	brca_tcga_pub	6575	censored	0.995566	6.87
TCGA-D8-A27G	brca_tcga_pub	6574	censored	0.995566	6.87
TCGA-AN-A0FS	brca_tcga	6573	censored	0.995566	6.9
TCGA-AN-A0FS	brca_tcga_pub2015	6572	censored	0.995566	6.9
TCGA-D8-A13Z	brca_tcga_pub	6571	censored	0.995566	6.9
P-0000356	breast_msk_2018	6570	censored	0.995566	6.9
P-0006355	breast_msk_2018	6569	deceased	0.995414	6.9
P-0008559	breast_msk_2018	6568	censored	0.995414	6.9
P-0013041	breast_msk_2018	6567	censored	0.995414	6.9
P-0014370	breast_msk_2018	6566	censored	0.995414	6.9
TCGA-AN-A0FS	brca_tcga_pan_can_atlas_2018	6565	censored	0.995414	6.90403
TCGA-AN-A0FK	brca_tcga_pub	6564	censored	0.995414	6.97
TCGA-AN-A0FK	brca_tcga	6563	censored	0.995414	7
TCGA-AN-A0FK	brca_tcga_pub2015	6562	censored	0.995414	7
P-0012971	breast_msk_2018	6561	censored	0.995414	7
P-0014406	breast_msk_2018	6560	censored	0.995414	7
P-0015587	breast_msk_2018	6559	censored	0.995414	7
P-0015708	breast_msk_2018	6558	censored	0.995414	7
P-0015864	breast_msk_2018	6557	censored	0.995414	7
P-0015871	breast_msk_2018	6556	censored	0.995414	7
P-0016373	breast_msk_2018	6555	censored	0.995414	7
P-0016636	breast_msk_2018	6554	censored	0.995414	7
P-0017701	breast_msk_2018	6553	censored	0.995414	7
TCGA-AN-A0FK	brca_tcga_pan_can_atlas_2018	6552	censored	0.995414	7.00266
TCGA-AN-A0FT	brca_tcga	6551	censored	0.995414	7.03
TCGA-AN-A0FT	brca_tcga_pub2015	6550	censored	0.995414	7.03
TCGA-AN-A0FT	brca_tcga_pan_can_atlas_2018	6549	censored	0.995414	7.03554
TCGA-B6-A400	brca_tcga	6548	censored	0.995414	7.06
TCGA-B6-A400	brca_tcga_pan_can_atlas_2018	6547	censored	0.995414	7.06842
TCGA-LD-A7W5	brca_tcga	6546	censored	0.995414	7.1
P-0006051	breast_msk_2018	6545	censored	0.995414	7.1
P-0014161	breast_msk_2018	6544	censored	0.995414	7.1
P-0014194	breast_msk_2018	6543	censored	0.995414	7.1
P-0014533	breast_msk_2018	6542	censored	0.995414	7.1
P-0015301	breast_msk_2018	6541	censored	0.995414	7.1
P-0015873	breast_msk_2018	6540	censored	0.995414	7.1
TCGA-LD-A7W5	brca_tcga_pan_can_atlas_2018	6539	censored	0.995414	7.10129
TCGA-E9-A249	brca_tcga	6538	censored	0.995414	7.13
TCGA-E9-A249	brca_tcga_pub2015	6537	censored	0.995414	7.13
TCGA-D8-A1JN	brca_tcga_pub	6536	censored	0.995414	7.13
TCGA-E9-A249	brca_tcga_pan_can_atlas_2018	6535	censored	0.995414	7.13417
TCGA-AN-A0FN	brca_tcga	6534	censored	0.995414	7.16
TCGA-AN-A0FN	brca_tcga_pub2015	6533	censored	0.995414	7.16
TCGA-AN-A0FN	brca_tcga_pub	6532	censored	0.995414	7.16
TCGA-D8-A1XM	brca_tcga_pub	6531	censored	0.995414	7.16
TCGA-AN-A0FN	brca_tcga_pan_can_atlas_2018	6530	censored	0.995414	7.16704
P-0015706	breast_msk_2018	6529	censored	0.995414	7.2
P-0015949	breast_msk_2018	6528	censored	0.995414	7.2
TCGA-BH-A18I	brca_tcga_pub	6527	censored	0.995414	7.23
TCGA-A2-A1FW	brca_tcga_pub	6526	censored	0.995414	7.26
P-0001594	breast_msk_2018	6525	censored	0.995414	7.3
P-0014244	breast_msk_2018	6524	censored	0.995414	7.3
P-0015294	breast_msk_2018	6523	censored	0.995414	7.3
P-0018237	breast_msk_2018	6522	censored	0.995414	7.3
TCGA-AN-A0AK	brca_tcga_pub	6521	censored	0.995414	7.33
TCGA-AN-A0AK	brca_tcga	6520	censored	0.995414	7.36
TCGA-BH-A18T	brca_tcga	6519	deceased	0.995262	7.36
TCGA-BH-A18T	brca_tcga_pub2015	6518	deceased	0.995109	7.36
TCGA-AN-A0AK	brca_tcga_pub2015	6517	censored	0.995109	7.36
TCGA-BH-A18T	brca_tcga_pub	6516	deceased	0.994956	7.36
TCGA-BH-A18T	brca_tcga_pan_can_atlas_2018	6515	deceased	0.994804	7.3643
TCGA-GI-A2C8	brca_tcga	6514	censored	0.994804	7.39
TCGA-GI-A2C8	brca_tcga_pub2015	6513	censored	0.994804	7.39
TCGA-GI-A2C8	brca_tcga_pan_can_atlas_2018	6512	censored	0.994804	7.39718
P-0013965	breast_msk_2018	6511	censored	0.994804	7.4
P-0014785	breast_msk_2018	6510	censored	0.994804	7.4
P-0015586	breast_msk_2018	6509	censored	0.994804	7.4
TCGA-LL-A73Z	brca_tcga	6508	deceased	0.994651	7.46
TCGA-AN-A0AL	brca_tcga	6507	censored	0.994651	7.46
TCGA-AN-A0AL	brca_tcga_pub2015	6506	censored	0.994651	7.46
TCGA-D8-A27F	brca_tcga_pub	6505	censored	0.994651	7.46
TCGA-EW-A1J5	brca_tcga_pub	6504	censored	0.994651	7.46
TCGA-AN-A0AL	brca_tcga_pan_can_atlas_2018	6503	censored	0.994651	7.46293
TCGA-LL-A73Z	brca_tcga_pan_can_atlas_2018	6502	deceased	0.994498	7.46293
P-0013969	breast_msk_2018	6501	censored	0.994498	7.5
P-0014515	breast_msk_2018	6500	censored	0.994498	7.5
P-0015391	breast_msk_2018	6499	censored	0.994498	7.5
P-0015634	breast_msk_2018	6498	censored	0.994498	7.5
P-0015695	breast_msk_2018	6497	censored	0.994498	7.5
P-0015981	breast_msk_2018	6496	censored	0.994498	7.5
P-0016545	breast_msk_2018	6495	censored	0.994498	7.5
TCGA-AN-A0FL	brca_tcga_pub	6494	censored	0.994498	7.56
TCGA-A7-A0CG	brca_tcga_pub	6493	censored	0.994498	7.56
TCGA-AN-A0FL	brca_tcga	6492	censored	0.994498	7.59
TCGA-AN-A0FL	brca_tcga_pub2015	6491	censored	0.994498	7.59
TCGA-AN-A0FL	brca_tcga_pan_can_atlas_2018	6490	censored	0.994498	7.59444
P-0006091	breast_msk_2018	6489	censored	0.994498	7.6
P-0013432	breast_msk_2018	6488	censored	0.994498	7.6
P-0015429	breast_msk_2018	6487	censored	0.994498	7.6
P-0015707	breast_msk_2018	6486	censored	0.994498	7.6
TCGA-A7-A0CH	brca_tcga_pub	6485	censored	0.994498	7.62
TCGA-E2-A15M	brca_tcga_pub	6484	censored	0.994498	7.69
P-0002657	breast_msk_2018	6483	censored	0.994498	7.7
P-0013411	breast_msk_2018	6482	censored	0.994498	7.7
P-0014576	breast_msk_2018	6481	censored	0.994498	7.7
P-0015351	breast_msk_2018	6480	censored	0.994498	7.7
TCGA-D8-A1X6	brca_tcga_pub	6479	censored	0.994498	7.75
MB-0010	brca_metabric	6478	deceased	0.994344	7.8
P-0013682	breast_msk_2018	6477	censored	0.994344	7.8
P-0013862	breast_msk_2018	6476	censored	0.994344	7.8
P-0015378	breast_msk_2018	6475	censored	0.994344	7.8
TCGA-D8-A1JM	brca_tcga_pub	6474	censored	0.994344	7.82
TCGA-EW-A2FV	brca_tcga_pub	6473	censored	0.994344	7.82
TCGA-EW-A1P8	brca_tcga	6472	deceased	0.994191	7.85
TCGA-EW-A1P8	brca_tcga_pub2015	6471	deceased	0.994037	7.85
TCGA-EW-A1P8	brca_tcga_pub	6470	deceased	0.993883	7.85
TCGA-E2-A1LS	brca_tcga_pub	6469	censored	0.993883	7.85
TCGA-EW-A1P8	brca_tcga_pan_can_atlas_2018	6468	deceased	0.99373	7.85745
MB-0581	brca_metabric	6467	deceased	0.993576	7.86667
TCGA-A2-A0T2	brca_tcga_pub	6466	deceased	0.993422	7.89
P-0014376	breast_msk_2018	6465	censored	0.993422	7.9
TCGA-AN-A0FJ	brca_tcga	6464	censored	0.993422	7.95
TCGA-A1-A0SM	brca_tcga	6463	censored	0.993422	7.95
TCGA-AN-A0FJ	brca_tcga_pub2015	6462	censored	0.993422	7.95
TCGA-A1-A0SM	brca_tcga_pub2015	6461	censored	0.993422	7.95
TCGA-A1-A0SM	brca_tcga_pub	6460	censored	0.993422	7.95
TCGA-A8-A07S	brca_tcga_pub	6459	censored	0.993422	7.95
TCGA-D8-A1XO	brca_tcga_pub	6458	censored	0.993422	7.95
TCGA-A1-A0SM	brca_tcga_pan_can_atlas_2018	6457	censored	0.993422	7.95608
TCGA-AN-A0FJ	brca_tcga_pan_can_atlas_2018	6456	censored	0.993422	7.95608
TCGA-A8-A07S	brca_tcga	6455	censored	0.993422	7.98
TCGA-AN-A0AJ	brca_tcga_pub	6454	censored	0.993422	7.98
TCGA-A2-A25D	brca_tcga_pub	6453	censored	0.993422	7.98
TCGA-A8-A07S	brca_tcga_pan_can_atlas_2018	6452	censored	0.993422	7.98895
P-0013751	breast_msk_2018	6451	censored	0.993422	8
P-0015001	breast_msk_2018	6450	censored	0.993422	8
P-0015356	breast_msk_2018	6449	censored	0.993422	8
P-0015382	breast_msk_2018	6448	censored	0.993422	8
MB-0100	brca_metabric	6447	deceased	0.993268	8.06667
P-0012130	breast_msk_2018	6446	censored	0.993268	8.1
P-0013050	breast_msk_2018	6445	censored	0.993268	8.1
P-0015343	breast_msk_2018	6444	censored	0.993268	8.1
P-0016212	breast_msk_2018	6443	censored	0.993268	8.1
TCGA-D8-A1J9	brca_tcga_pub	6442	censored	0.993268	8.15
P-0003859	breast_msk_2018	6441	censored	0.993268	8.2
P-0014121	breast_msk_2018	6440	censored	0.993268	8.2
P-0014781	breast_msk_2018	6439	censored	0.993268	8.2
TCGA-AC-A7VB	brca_tcga	6438	censored	0.993268	8.21
TCGA-AC-A7VB	brca_tcga_pan_can_atlas_2018	6437	censored	0.993268	8.21909
TCGA-EW-A1IW	brca_tcga_pub	6436	censored	0.993268	8.28
TCGA-EW-A1J3	brca_tcga_pub	6435	censored	0.993268	8.28
P-0014573	breast_msk_2018	6434	censored	0.993268	8.3
P-0014580	breast_msk_2018	6433	censored	0.993268	8.3
P-0015551	breast_msk_2018	6432	censored	0.993268	8.3
TCGA-A2-A0T2	brca_tcga	6431	deceased	0.993114	8.38
TCGA-A2-A0T2	brca_tcga_pub2015	6430	deceased	0.992959	8.38
TCGA-A2-A0T2	brca_tcga_pan_can_atlas_2018	6429	deceased	0.992805	8.38347
P-0014320	breast_msk_2018	6428	censored	0.992805	8.4
TCGA-D8-A1J8	brca_tcga_pub	6427	censored	0.992805	8.41
TCGA-A7-A26F	brca_tcga_pub	6426	censored	0.992805	8.44
TCGA-EW-A1IY	brca_tcga	6425	censored	0.992805	8.48
TCGA-EW-A1IY	brca_tcga_pub2015	6424	censored	0.992805	8.48
TCGA-A2-A25B	brca_tcga_pub	6423	censored	0.992805	8.48
TCGA-EW-A1IY	brca_tcga_pub	6422	censored	0.992805	8.48
TCGA-EW-A1IY	brca_tcga_pan_can_atlas_2018	6421	censored	0.992805	8.4821
P-0013179	breast_msk_2018	6420	censored	0.992805	8.5
P-0013640	breast_msk_2018	6419	censored	0.992805	8.5
TCGA-A1-A0SB	brca_tcga	6418	censored	0.992805	8.51
TCGA-A1-A0SB	brca_tcga_pub2015	6417	censored	0.992805	8.51
TCGA-A1-A0SB	brca_tcga_pub	6416	censored	0.992805	8.51
TCGA-A1-A0SB	brca_tcga_pan_can_atlas_2018	6415	censored	0.992805	8.51498
TCGA-AO-A0J7	brca_tcga_pub	6414	censored	0.992805	8.54
TCGA-EW-A1IZ	brca_tcga_pub	6413	censored	0.992805	8.54
P-0013157	breast_msk_2018	6412	censored	0.992805	8.6
P-0015277	breast_msk_2018	6411	censored	0.992805	8.6
P-0012911	breast_msk_2018	6410	censored	0.992805	8.7
P-0012992	breast_msk_2018	6409	censored	0.992805	8.7
P-0013043	breast_msk_2018	6408	censored	0.992805	8.7
P-0013207	breast_msk_2018	6407	censored	0.992805	8.7
P-0015828	breast_msk_2018	6406	censored	0.992805	8.7
TCGA-D8-A1JL	brca_tcga_pub	6405	censored	0.992805	8.71
TCGA-E2-A1LK	brca_tcga	6404	deceased	0.99265	8.74
TCGA-A7-A6VY	brca_tcga	6403	censored	0.99265	8.74
TCGA-E2-A1LK	brca_tcga_pub2015	6402	deceased	0.992495	8.74
TCGA-A7-A0DB	brca_tcga_pub	6401	censored	0.992495	8.74
TCGA-E2-A1LK	brca_tcga_pub	6400	deceased	0.99234	8.74
TCGA-A7-A6VY	brca_tcga_pan_can_atlas_2018	6399	censored	0.99234	8.74511
TCGA-E2-A1LK	brca_tcga_pan_can_atlas_2018	6398	deceased	0.992185	8.74511
TCGA-A7-A13D	brca_tcga_pub	6397	censored	0.992185	8.77
TCGA-E2-A15T	brca_tcga_pub	6396	censored	0.992185	8.77
TCGA-EW-A1PA	brca_tcga_pub	6395	censored	0.992185	8.77
P-0012534	breast_msk_2018	6394	censored	0.992185	8.8
P-0015059	breast_msk_2018	6393	censored	0.992185	8.8
TCGA-BH-A18F	brca_tcga_pub	6392	censored	0.992185	8.81
TCGA-OL-A97C	brca_tcga	6391	censored	0.992185	8.9
P-0012546	breast_msk_2018	6390	censored	0.992185	8.9
P-0012843	breast_msk_2018	6389	censored	0.992185	8.9
P-0013015	breast_msk_2018	6388	censored	0.992185	8.9
P-0013613	breast_msk_2018	6387	censored	0.992185	8.9
P-0014368	breast_msk_2018	6386	censored	0.992185	8.9
P-0014703	breast_msk_2018	6385	censored	0.992185	8.9
TCGA-OL-A97C	brca_tcga_pan_can_atlas_2018	6384	censored	0.992185	8.90949
TCGA-A7-A0D9	brca_tcga_pub	6383	censored	0.992185	8.94
TCGA-D8-A1X8	brca_tcga_pub	6382	censored	0.992185	8.94
TCGA-A8-A09R	brca_tcga	6381	censored	0.992185	8.97
TCGA-A8-A07R	brca_tcga	6380	censored	0.992185	8.97
TCGA-A8-A07R	brca_tcga_pub2015	6379	censored	0.992185	8.97
TCGA-A8-A09R	brca_tcga_pub2015	6378	censored	0.992185	8.97
TCGA-A8-A07R	brca_tcga_pub	6377	censored	0.992185	8.97
TCGA-A8-A09R	brca_tcga_pub	6376	censored	0.992185	8.97
TCGA-D8-A1JD	brca_tcga_pub	6375	censored	0.992185	8.97
TCGA-A8-A07R	brca_tcga_pan_can_atlas_2018	6374	censored	0.992185	8.97524
TCGA-A8-A09R	brca_tcga_pan_can_atlas_2018	6373	censored	0.992185	8.97524
TCGA-A8-A079	brca_tcga	6372	censored	0.992185	9
TCGA-A8-A079	brca_tcga_pub2015	6371	censored	0.992185	9
TCGA-A8-A079	brca_tcga_pub	6370	censored	0.992185	9
TCGA-E2-A15S	brca_tcga_pub	6369	censored	0.992185	9
TCGA-D8-A1JJ	brca_tcga_pub	6368	censored	0.992185	9
TCGA-D8-A1XA	brca_tcga_pub	6367	censored	0.992185	9
TCGA-A8-A079	brca_tcga_pan_can_atlas_2018	6366	censored	0.992185	9.00812
TCGA-E2-A15K	brca_tcga	6365	censored	0.992185	9.03
TCGA-E2-A15K	brca_tcga_pub2015	6364	censored	0.992185	9.03
TCGA-E2-A15K	brca_tcga_pan_can_atlas_2018	6363	censored	0.992185	9.041
MB-0189	brca_metabric	6362	deceased	0.992029	9.06667
TCGA-AO-A0J8	brca_tcga_pub	6361	censored	0.992029	9.1
P-0014278	breast_msk_2018	6360	censored	0.992029	9.1
P-0014494	breast_msk_2018	6359	censored	0.992029	9.1
P-0014938	breast_msk_2018	6358	censored	0.992029	9.1
MB-7055	brca_metabric	6357	deceased	0.991873	9.13333
P-0010326	breast_msk_2018	6356	censored	0.991873	9.2
P-0013051	breast_msk_2018	6355	censored	0.991873	9.2
P-0013625	breast_msk_2018	6354	deceased	0.991716	9.2
TCGA-EW-A1J1	brca_tcga_pub	6353	censored	0.991716	9.27
P-0008751	breast_msk_2018	6352	censored	0.991716	9.3
P-0013208	breast_msk_2018	6351	censored	0.991716	9.3
P-0013269	breast_msk_2018	6350	censored	0.991716	9.3
P-0013299	breast_msk_2018	6349	censored	0.991716	9.3
P-0013585	breast_msk_2018	6348	censored	0.991716	9.3
TCGA-A7-A6VW	brca_tcga	6347	censored	0.991716	9.36
TCGA-A2-A25C	brca_tcga_pub	6346	censored	0.991716	9.36
TCGA-A7-A6VW	brca_tcga_pan_can_atlas_2018	6345	censored	0.991716	9.36976
P-0014306	breast_msk_2018	6344	censored	0.991716	9.4
P-0014577	breast_msk_2018	6343	censored	0.991716	9.4
TCGA-BH-AB28	brca_tcga	6342	censored	0.991716	9.43
MB-2850	brca_metabric	6341	deceased	0.99156	9.43333
TCGA-BH-AB28	brca_tcga_pan_can_atlas_2018	6340	censored	0.99156	9.43551
TCGA-E9-A2JT	brca_tcga	6339	censored	0.99156	9.46
TCGA-E9-A2JT	brca_tcga_pub2015	6338	censored	0.99156	9.46
TCGA-E9-A2JT	brca_tcga_pan_can_atlas_2018	6337	censored	0.99156	9.46839
P-0015052	breast_msk_2018	6336	censored	0.99156	9.5
TCGA-BH-A0E6	brca_tcga_pub	6335	censored	0.99156	9.59
MB-2964	brca_metabric	6334	deceased	0.991404	9.6
P-0012290	breast_msk_2018	6333	censored	0.991404	9.6
TCGA-BH-A6R8	brca_tcga	6332	censored	0.991404	9.63
TCGA-BH-A0E6	brca_tcga	6331	censored	0.991404	9.63
TCGA-BH-A0E6	brca_tcga_pub2015	6330	censored	0.991404	9.63
TCGA-BH-A0E6	brca_tcga_pan_can_atlas_2018	6329	censored	0.991404	9.63277
TCGA-AO-A0J4	brca_tcga_pub	6328	censored	0.991404	9.66
TCGA-BH-A8FY	brca_tcga	6327	deceased	0.991247	9.69
TCGA-BH-A8FY	brca_tcga_pan_can_atlas_2018	6326	deceased	0.99109	9.69852
MB-5441	brca_metabric	6325	deceased	0.990933	9.7
P-0014509	breast_msk_2018	6324	censored	0.990933	9.7
TCGA-E2-A1BC	brca_tcga_pub	6323	censored	0.990933	9.76
TCGA-C8-A278	brca_tcga_pan_can_atlas_2018	6322	censored	0.990933	9.76428
P-0012116	breast_msk_2018	6321	censored	0.990933	9.8
MB-0424	brca_metabric	6320	deceased	0.990777	9.83333
TCGA-E9-A1NI	brca_tcga	6319	censored	0.990777	9.86
TCGA-E9-A1NI	brca_tcga_pub2015	6318	censored	0.990777	9.86
TCGA-E9-A1NI	brca_tcga_pan_can_atlas_2018	6317	censored	0.990777	9.86291
P-0002239	breast_msk_2018	6316	deceased	0.99062	9.9
TCGA-D8-A1Y1	brca_tcga	6315	deceased	0.990463	9.92
TCGA-PL-A8LZ	brca_tcga	6314	censored	0.990463	9.92
TCGA-D8-A1Y1	brca_tcga_pub2015	6313	deceased	0.990306	9.92
TCGA-AO-A0J3	brca_tcga_pub	6312	censored	0.990306	9.92
TCGA-D8-A1Y1	brca_tcga_pan_can_atlas_2018	6311	deceased	0.990149	9.92866
TCGA-PL-A8LZ	brca_tcga_pan_can_atlas_2018	6310	censored	0.990149	9.92866
TCGA-5T-A9QA	brca_tcga	6309	censored	0.990149	9.95
TCGA-AN-A0AJ	brca_tcga	6308	censored	0.990149	9.95
TCGA-AN-A0AJ	brca_tcga_pub2015	6307	censored	0.990149	9.95
TCGA-A8-A07U	brca_tcga_pub	6306	censored	0.990149	9.96
TCGA-5T-A9QA	brca_tcga_pan_can_atlas_2018	6305	censored	0.990149	9.96153
TCGA-AN-A0AJ	brca_tcga_pan_can_atlas_2018	6304	censored	0.990149	9.96153
TCGA-A8-A07O	brca_tcga	6303	censored	0.990149	9.99
TCGA-A8-A07W	brca_tcga	6302	censored	0.990149	9.99
TCGA-A8-A08L	brca_tcga	6301	deceased	0.989992	9.99
TCGA-A8-A099	brca_tcga	6300	censored	0.989992	9.99
TCGA-A8-A09A	brca_tcga	6299	censored	0.989992	9.99
TCGA-A8-A07O	brca_tcga_pub2015	6298	censored	0.989992	9.99
TCGA-A8-A07W	brca_tcga_pub2015	6297	censored	0.989992	9.99
TCGA-A8-A08L	brca_tcga_pub2015	6296	deceased	0.989835	9.99
TCGA-A8-A099	brca_tcga_pub2015	6295	censored	0.989835	9.99
TCGA-A8-A09A	brca_tcga_pub2015	6294	censored	0.989835	9.99
TCGA-A8-A07O	brca_tcga_pub	6293	censored	0.989835	9.99
TCGA-A8-A08L	brca_tcga_pub	6292	deceased	0.989677	9.99
TCGA-A8-A099	brca_tcga_pub	6291	censored	0.989677	9.99
TCGA-A8-A09A	brca_tcga_pub	6290	censored	0.989677	9.99
TCGA-A8-A07W	brca_tcga_pub	6289	censored	0.989677	9.99
TCGA-A8-A07O	brca_tcga_pan_can_atlas_2018	6288	censored	0.989677	9.99441
TCGA-A8-A07W	brca_tcga_pan_can_atlas_2018	6287	censored	0.989677	9.99441
TCGA-A8-A08L	brca_tcga_pan_can_atlas_2018	6286	deceased	0.98952	9.99441
TCGA-A8-A099	brca_tcga_pan_can_atlas_2018	6285	censored	0.98952	9.99441
TCGA-A8-A09A	brca_tcga_pan_can_atlas_2018	6284	censored	0.98952	9.99441
P-0008049	breast_msk_2018	6283	censored	0.98952	10
MB-6100	brca_metabric	6282	deceased	0.989362	10.0667
TCGA-D8-A27R	brca_tcga	6281	censored	0.989362	10.09
TCGA-D8-A27R	brca_tcga_pub2015	6280	censored	0.989362	10.09
TCGA-D8-A27R	brca_tcga_pan_can_atlas_2018	6279	censored	0.989362	10.093
P-0012122	breast_msk_2018	6278	censored	0.989362	10.1
P-0012565	breast_msk_2018	6277	censored	0.989362	10.1
P-0013762	breast_msk_2018	6276	censored	0.989362	10.1
TCGA-A7-A0CE	brca_tcga_pub	6275	censored	0.989362	10.15
P-0005263	breast_msk_2018	6274	censored	0.989362	10.2
TCGA-EW-A1P6	brca_tcga_pub	6273	censored	0.989362	10.25
TCGA-A7-A3J0	brca_tcga	6272	censored	0.989362	10.28
TCGA-A7-A6VV	brca_tcga	6271	censored	0.989362	10.28
TCGA-A7-A3J0	brca_tcga_pub2015	6270	censored	0.989362	10.28
TCGA-A7-A3J0	brca_tcga_pan_can_atlas_2018	6269	censored	0.989362	10.2903
TCGA-A7-A6VV	brca_tcga_pan_can_atlas_2018	6268	censored	0.989362	10.2903
P-0013431	breast_msk_2018	6267	censored	0.989362	10.3
TCGA-E2-A15D	brca_tcga_pub	6266	censored	0.989362	10.35
TCGA-E2-A15G	brca_tcga_pub	6265	censored	0.989362	10.35
TCGA-E2-A15P	brca_tcga_pub	6264	censored	0.989362	10.35
P-0001335	breast_msk_2018	6263	censored	0.989362	10.4
P-0007627	breast_msk_2018	6262	deceased	0.989204	10.4
P-0011502	breast_msk_2018	6261	censored	0.989204	10.4
P-0012756	breast_msk_2018	6260	censored	0.989204	10.4
P-0013187	breast_msk_2018	6259	censored	0.989204	10.4
P-0013572	breast_msk_2018	6258	censored	0.989204	10.4
TCGA-C8-A1HL	brca_tcga	6257	censored	0.989204	10.41
TCGA-A7-A6VX	brca_tcga	6256	censored	0.989204	10.41
TCGA-C8-A1HL	brca_tcga_pub2015	6255	censored	0.989204	10.41
TCGA-E2-A1BD	brca_tcga_pub	6254	censored	0.989204	10.42
TCGA-A7-A6VX	brca_tcga_pan_can_atlas_2018	6253	censored	0.989204	10.4218
TCGA-C8-A1HL	brca_tcga_pan_can_atlas_2018	6252	censored	0.989204	10.4218
TCGA-D8-A1XL	brca_tcga_pub	6251	censored	0.989204	10.48
P-0001635	breast_msk_2018	6250	deceased	0.989046	10.5
P-0005735	breast_msk_2018	6249	censored	0.989046	10.5
P-0007573	breast_msk_2018	6248	censored	0.989046	10.5
P-0008994	breast_msk_2018	6247	censored	0.989046	10.5
P-0014250	breast_msk_2018	6246	censored	0.989046	10.5
TCGA-EW-A1PE	brca_tcga	6245	censored	0.989046	10.51
TCGA-BH-A42T	brca_tcga	6244	deceased	0.988888	10.51
TCGA-EW-A1PE	brca_tcga_pub2015	6243	censored	0.988888	10.51
TCGA-BH-A42T	brca_tcga_pub2015	6242	deceased	0.988729	10.51
TCGA-BH-A42T	brca_tcga_pan_can_atlas_2018	6241	deceased	0.988571	10.5204
TCGA-EW-A1PE	brca_tcga_pan_can_atlas_2018	6240	censored	0.988571	10.5204
TCGA-A2-A25F	brca_tcga	6239	censored	0.988571	10.58
TCGA-A7-A3IZ	brca_tcga	6238	censored	0.988571	10.58
TCGA-AR-A5QQ	brca_tcga	6237	deceased	0.988412	10.58
TCGA-A7-A3IZ	brca_tcga_pub2015	6236	censored	0.988412	10.58
TCGA-A2-A25F	brca_tcga_pub2015	6235	censored	0.988412	10.58
TCGA-A2-A25F	brca_tcga_pan_can_atlas_2018	6234	censored	0.988412	10.5862
TCGA-A7-A3IZ	brca_tcga_pan_can_atlas_2018	6233	censored	0.988412	10.5862
TCGA-AR-A5QQ	brca_tcga_pan_can_atlas_2018	6232	deceased	0.988254	10.5862
P-0000345	breast_msk_2018	6231	censored	0.988254	10.6
P-0016828	breast_msk_2018	6230	censored	0.988254	10.6
TCGA-LD-A9QF	brca_tcga	6229	censored	0.988254	10.61
TCGA-LD-A9QF	brca_tcga_pan_can_atlas_2018	6228	censored	0.988254	10.6191
MB-6098	brca_metabric	6227	deceased	0.988095	10.6333
TCGA-E2-A154	brca_tcga_pub	6226	censored	0.988095	10.68
P-0014476	breast_msk_2018	6225	censored	0.988095	10.7
TCGA-A7-A5ZW	brca_tcga	6224	censored	0.988095	10.71
TCGA-A7-A5ZW	brca_tcga_pub2015	6223	censored	0.988095	10.71
TCGA-A7-A13E	brca_tcga_pub	6222	censored	0.988095	10.71
TCGA-D8-A1XK	brca_tcga_pub	6221	censored	0.988095	10.71
TCGA-A7-A5ZW	brca_tcga_pan_can_atlas_2018	6220	censored	0.988095	10.7177
TCGA-BH-A0GZ	brca_tcga	6219	censored	0.988095	10.78
TCGA-BH-A0GZ	brca_tcga_pub2015	6218	censored	0.988095	10.78
TCGA-BH-A0GZ	brca_tcga_pub	6217	censored	0.988095	10.78
TCGA-BH-A0GZ	brca_tcga_pan_can_atlas_2018	6216	censored	0.988095	10.7834
P-0014520	breast_msk_2018	6215	censored	0.988095	10.8
P-0014583	breast_msk_2018	6214	censored	0.988095	10.8
MB-0164	brca_metabric	6213	censored	0.988095	10.8333
MB-0228	brca_metabric	6212	deceased	0.987936	10.8333
TCGA-E2-A15R	brca_tcga_pub	6211	censored	0.987936	10.84
MB-3363	brca_metabric	6210	deceased	0.987777	10.8667
TCGA-E2-A15L	brca_tcga_pub	6209	censored	0.987777	10.87
P-0013265	breast_msk_2018	6208	censored	0.987777	10.9
P-0014926	breast_msk_2018	6207	censored	0.987777	10.9
P-0016808	breast_msk_2018	6206	censored	0.987777	10.9
TCGA-C8-A1HF	brca_tcga	6205	censored	0.987777	10.91
TCGA-C8-A1HF	brca_tcga_pub2015	6204	censored	0.987777	10.91
TCGA-C8-A1HF	brca_tcga_pan_can_atlas_2018	6203	censored	0.987777	10.9149
P-0005859	breast_msk_2018	6202	censored	0.987777	11
P-0012858	breast_msk_2018	6201	censored	0.987777	11
TCGA-A7-A5ZX	brca_tcga	6200	censored	0.987777	11.04
TCGA-E2-A15M	brca_tcga	6199	deceased	0.987618	11.04
TCGA-A7-A5ZX	brca_tcga_pub2015	6198	censored	0.987618	11.04
TCGA-E2-A15M	brca_tcga_pub2015	6197	deceased	0.987458	11.04
TCGA-A7-A5ZX	brca_tcga_pan_can_atlas_2018	6196	censored	0.987458	11.0465
TCGA-E2-A15M	brca_tcga_pan_can_atlas_2018	6195	deceased	0.987299	11.0465
TCGA-E2-A1IU	brca_tcga	6194	censored	0.987299	11.07
TCGA-E2-A1IU	brca_tcga_pub2015	6193	censored	0.987299	11.07
TCGA-E2-A1IU	brca_tcga_pan_can_atlas_2018	6192	censored	0.987299	11.0793
TCGA-E2-A1B6	brca_tcga_pub	6191	censored	0.987299	11.1
P-0012975	breast_msk_2018	6190	censored	0.987299	11.1
P-0013145	breast_msk_2018	6189	censored	0.987299	11.1
TCGA-E9-A1R6	brca_tcga	6188	censored	0.987299	11.14
TCGA-E9-A1R6	brca_tcga_pub2015	6187	censored	0.987299	11.14
TCGA-E9-A1R6	brca_tcga_pan_can_atlas_2018	6186	censored	0.987299	11.1451
P-0013779	breast_msk_2018	6185	censored	0.987299	11.2
TCGA-C8-A1HI	brca_tcga	6184	censored	0.987299	11.27
TCGA-A7-A3J1	brca_tcga	6183	censored	0.987299	11.27
TCGA-A7-A3J1	brca_tcga_pub2015	6182	censored	0.987299	11.27
TCGA-C8-A1HI	brca_tcga_pub2015	6181	censored	0.987299	11.27
TCGA-A7-A3J1	brca_tcga_pan_can_atlas_2018	6180	censored	0.987299	11.2766
TCGA-C8-A1HI	brca_tcga_pan_can_atlas_2018	6179	censored	0.987299	11.2766
MB-4015	brca_metabric	6178	deceased	0.987139	11.3
TCGA-D8-A146	brca_tcga_pub	6177	censored	0.987139	11.3
P-0012127	breast_msk_2018	6176	censored	0.987139	11.3
P-0012591	breast_msk_2018	6175	censored	0.987139	11.3
P-0013203	breast_msk_2018	6174	censored	0.987139	11.3
P-0014013	breast_msk_2018	6173	censored	0.987139	11.3
TCGA-C8-A1HG	brca_tcga	6172	censored	0.987139	11.33
TCGA-A7-A3IY	brca_tcga	6171	censored	0.987139	11.33
TCGA-A7-A3IY	brca_tcga_pub2015	6170	censored	0.987139	11.33
TCGA-C8-A1HG	brca_tcga_pub2015	6169	censored	0.987139	11.33
TCGA-A7-A3IY	brca_tcga_pan_can_atlas_2018	6168	censored	0.987139	11.3423
TCGA-C8-A1HG	brca_tcga_pan_can_atlas_2018	6167	censored	0.987139	11.3423
TCGA-AO-A0JA	brca_tcga_pub	6166	censored	0.987139	11.37
TCGA-W8-A86G	brca_tcga	6165	censored	0.987139	11.4
TCGA-W8-A86G	brca_tcga_pan_can_atlas_2018	6164	censored	0.987139	11.4081
TCGA-AC-A62V	brca_tcga	6163	deceased	0.986979	11.43
TCGA-4H-AAAK	brca_tcga	6162	censored	0.986979	11.43
TCGA-A7-A13G	brca_tcga_pub	6161	censored	0.986979	11.43
TCGA-4H-AAAK	brca_tcga_pan_can_atlas_2018	6160	censored	0.986979	11.441
TCGA-AC-A62V	brca_tcga_pan_can_atlas_2018	6159	deceased	0.986819	11.441
TCGA-AO-A1KS	brca_tcga	6158	censored	0.986819	11.5
TCGA-AO-A1KS	brca_tcga_pub2015	6157	censored	0.986819	11.5
TCGA-E2-A1LG	brca_tcga_pub	6156	censored	0.986819	11.5
P-0013033	breast_msk_2018	6155	censored	0.986819	11.5
P-0014466	breast_msk_2018	6154	censored	0.986819	11.5
TCGA-AO-A1KS	brca_tcga_pan_can_atlas_2018	6153	censored	0.986819	11.5067
TCGA-JL-A3YX	brca_tcga	6152	censored	0.986819	11.56
TCGA-JL-A3YX	brca_tcga_pub2015	6151	censored	0.986819	11.56
TCGA-JL-A3YX	brca_tcga_pan_can_atlas_2018	6150	censored	0.986819	11.5725
MB-0354	brca_metabric	6149	deceased	0.986658	11.6
P-0012603	breast_msk_2018	6148	censored	0.986658	11.6
P-0012754	breast_msk_2018	6147	censored	0.986658	11.6
P-0012831	breast_msk_2018	6146	censored	0.986658	11.6
TCGA-AO-A0JF	brca_tcga_pub	6145	censored	0.986658	11.63
TCGA-BH-A0BW	brca_tcga_pub	6144	censored	0.986658	11.66
MB-4010	brca_metabric	6143	deceased	0.986498	11.7
P-0011280	breast_msk_2018	6142	censored	0.986498	11.7
P-0011470	breast_msk_2018	6141	censored	0.986498	11.7
P-0012532	breast_msk_2018	6140	censored	0.986498	11.7
P-0016773	breast_msk_2018	6139	censored	0.986498	11.7
TCGA-C8-A12M	brca_tcga	6138	censored	0.986498	11.76
TCGA-C8-A12N	brca_tcga	6137	censored	0.986498	11.76
TCGA-C8-A12P	brca_tcga	6136	censored	0.986498	11.76
TCGA-C8-A12N	brca_tcga_pub2015	6135	censored	0.986498	11.76
TCGA-C8-A12P	brca_tcga_pub2015	6134	censored	0.986498	11.76
TCGA-C8-A12M	brca_tcga_pub2015	6133	censored	0.986498	11.76
TCGA-C8-A12M	brca_tcga_pan_can_atlas_2018	6132	censored	0.986498	11.7697
TCGA-C8-A12N	brca_tcga_pan_can_atlas_2018	6131	censored	0.986498	11.7697
TCGA-C8-A12P	brca_tcga_pan_can_atlas_2018	6130	censored	0.986498	11.7697
P-0014927	breast_msk_2018	6129	censored	0.986498	11.8
TCGA-JL-A3YW	brca_tcga	6128	censored	0.986498	11.83
TCGA-JL-A3YW	brca_tcga_pub2015	6127	censored	0.986498	11.83
TCGA-AR-A0TU	brca_tcga_pub	6126	censored	0.986498	11.83
TCGA-JL-A3YW	brca_tcga_pan_can_atlas_2018	6125	censored	0.986498	11.8355
MB-0259	brca_metabric	6124	deceased	0.986336	11.8667
MB-4360	brca_metabric	6123	deceased	0.986175	11.8667
TCGA-B6-A0I9	brca_tcga	6122	deceased	0.986014	11.89
TCGA-B6-A0I9	brca_tcga_pub2015	6121	deceased	0.985853	11.89
TCGA-D8-A13Y	brca_tcga_pub	6120	censored	0.985853	11.89
P-0007987	breast_msk_2018	6119	censored	0.985853	11.9
P-0010296	breast_msk_2018	6118	censored	0.985853	11.9
P-0010528	breast_msk_2018	6117	censored	0.985853	11.9
P-0012396	breast_msk_2018	6116	censored	0.985853	11.9
P-0012820	breast_msk_2018	6115	censored	0.985853	11.9
P-0014737	breast_msk_2018	6114	censored	0.985853	11.9
P-0015003	breast_msk_2018	6113	censored	0.985853	11.9
TCGA-B6-A0I9	brca_tcga_pan_can_atlas_2018	6112	deceased	0.985692	11.9012
TCGA-C8-A12L	brca_tcga	6111	censored	0.985692	11.93
TCGA-C8-A12L	brca_tcga_pub2015	6110	censored	0.985692	11.93
TCGA-C8-A12L	brca_tcga_pan_can_atlas_2018	6109	censored	0.985692	11.9341
TCGA-A7-A426	brca_tcga	6108	censored	0.985692	11.96
TCGA-A7-A426	brca_tcga_pub2015	6107	censored	0.985692	11.96
TCGA-A7-A426	brca_tcga_pan_can_atlas_2018	6106	censored	0.985692	11.967
TCGA-A8-A07J	brca_tcga	6105	censored	0.985692	11.99
TCGA-A8-A08I	brca_tcga	6104	censored	0.985692	11.99
TCGA-A8-A09B	brca_tcga	6103	censored	0.985692	11.99
TCGA-A8-A0A1	brca_tcga	6102	censored	0.985692	11.99
TCGA-A8-A097	brca_tcga	6101	censored	0.985692	11.99
TCGA-A8-A07J	brca_tcga_pub2015	6100	censored	0.985692	11.99
TCGA-A8-A08I	brca_tcga_pub2015	6099	censored	0.985692	11.99
TCGA-A8-A097	brca_tcga_pub2015	6098	censored	0.985692	11.99
TCGA-A8-A09B	brca_tcga_pub2015	6097	censored	0.985692	11.99
TCGA-A8-A0A1	brca_tcga_pub2015	6096	censored	0.985692	11.99
TCGA-A8-A07J	brca_tcga_pub	6095	censored	0.985692	11.99
TCGA-A8-A09B	brca_tcga_pub	6094	censored	0.985692	11.99
TCGA-A8-A0A1	brca_tcga_pub	6093	censored	0.985692	11.99
TCGA-A8-A08I	brca_tcga_pub	6092	censored	0.985692	11.99
TCGA-A8-A097	brca_tcga_pub	6091	censored	0.985692	11.99
TCGA-EW-A1P5	brca_tcga_pub	6090	censored	0.985692	11.99
TCGA-A8-A07J	brca_tcga_pan_can_atlas_2018	6089	censored	0.985692	11.9999
TCGA-A8-A08I	brca_tcga_pan_can_atlas_2018	6088	censored	0.985692	11.9999
TCGA-A8-A097	brca_tcga_pan_can_atlas_2018	6087	censored	0.985692	11.9999
TCGA-A8-A09B	brca_tcga_pan_can_atlas_2018	6086	censored	0.985692	11.9999
TCGA-A8-A0A1	brca_tcga_pan_can_atlas_2018	6085	censored	0.985692	11.9999
P-0009441	breast_msk_2018	6084	censored	0.985692	12
TCGA-C8-A1HK	brca_tcga	6083	censored	0.985692	12.02
TCGA-D8-A1JF	brca_tcga	6082	censored	0.985692	12.02
TCGA-C8-A1HK	brca_tcga_pub2015	6081	censored	0.985692	12.02
TCGA-D8-A1JF	brca_tcga_pub2015	6080	censored	0.985692	12.02
TCGA-C8-A1HK	brca_tcga_pan_can_atlas_2018	6079	censored	0.985692	12.0327
TCGA-D8-A1JF	brca_tcga_pan_can_atlas_2018	6078	censored	0.985692	12.0327
TCGA-A7-A5ZV	brca_tcga	6077	censored	0.985692	12.09
TCGA-A7-A5ZV	brca_tcga_pub2015	6076	censored	0.985692	12.09
TCGA-A7-A5ZV	brca_tcga_pan_can_atlas_2018	6075	censored	0.985692	12.0985
P-0012500	breast_msk_2018	6074	censored	0.985692	12.1
P-0012634	breast_msk_2018	6073	censored	0.985692	12.1
P-0012635	breast_msk_2018	6072	censored	0.985692	12.1
P-0013257	breast_msk_2018	6071	censored	0.985692	12.1
TCGA-B6-A0I9	brca_tcga_pub	6070	deceased	0.98553	12.12
TCGA-D8-A1JS	brca_tcga	6069	censored	0.98553	12.19
TCGA-EW-A1IW	brca_tcga	6068	censored	0.98553	12.19
TCGA-EW-A1IW	brca_tcga_pub2015	6067	censored	0.98553	12.19
TCGA-D8-A1JS	brca_tcga_pub2015	6066	censored	0.98553	12.19
TCGA-D8-A1JS	brca_tcga_pub	6065	censored	0.98553	12.19
TCGA-A2-A1G1	brca_tcga_pub	6064	censored	0.98553	12.19
TCGA-C8-A27A	brca_tcga_pub	6063	censored	0.98553	12.19
TCGA-D8-A1JS	brca_tcga_pan_can_atlas_2018	6062	censored	0.98553	12.1971
TCGA-EW-A1IW	brca_tcga_pan_can_atlas_2018	6061	censored	0.98553	12.1971
P-0008535	breast_msk_2018	6060	censored	0.98553	12.2
P-0009859	breast_msk_2018	6059	censored	0.98553	12.2
P-0010719	breast_msk_2018	6058	censored	0.98553	12.2
P-0012829	breast_msk_2018	6057	censored	0.98553	12.2
P-0015049	breast_msk_2018	6056	censored	0.98553	12.2
P-0015050	breast_msk_2018	6055	censored	0.98553	12.2
TCGA-BH-A0WA	brca_tcga_pub	6054	censored	0.98553	12.22
TCGA-A7-A0CD	brca_tcga_pub	6053	censored	0.98553	12.22
TCGA-A2-A1G4	brca_tcga_pub	6052	censored	0.98553	12.22
TCGA-D8-A27W	brca_tcga	6051	censored	0.98553	12.25
TCGA-AC-A6IX	brca_tcga	6050	censored	0.98553	12.25
TCGA-D8-A27W	brca_tcga_pub2015	6049	censored	0.98553	12.25
TCGA-A7-A0DA	brca_tcga_pub	6048	censored	0.98553	12.25
TCGA-AC-A6IX	brca_tcga_pan_can_atlas_2018	6047	censored	0.98553	12.2629
TCGA-D8-A27W	brca_tcga_pan_can_atlas_2018	6046	censored	0.98553	12.2629
MB-5378	brca_metabric	6045	deceased	0.985366	12.2667
P-0000353	breast_msk_2018	6044	deceased	0.985203	12.3
P-0003381	breast_msk_2018	6043	censored	0.985203	12.3
P-0009931	breast_msk_2018	6042	censored	0.985203	12.3
P-0012998	breast_msk_2018	6041	censored	0.985203	12.3
TCGA-C8-A1HM	brca_tcga	6040	censored	0.985203	12.32
TCGA-C8-A1HE	brca_tcga	6039	censored	0.985203	12.32
TCGA-C8-A1HO	brca_tcga	6038	censored	0.985203	12.32
TCGA-E9-A295	brca_tcga	6037	censored	0.985203	12.32
TCGA-AN-A0XO	brca_tcga	6036	censored	0.985203	12.32
TCGA-E9-A295	brca_tcga_pub2015	6035	censored	0.985203	12.32
TCGA-C8-A1HE	brca_tcga_pub2015	6034	censored	0.985203	12.32
TCGA-C8-A1HM	brca_tcga_pub2015	6033	censored	0.985203	12.32
TCGA-C8-A1HO	brca_tcga_pub2015	6032	censored	0.985203	12.32
TCGA-AN-A0XO	brca_tcga_pub	6031	censored	0.985203	12.32
TCGA-AN-A0XO	brca_tcga_pan_can_atlas_2018	6030	censored	0.985203	12.3286
TCGA-C8-A1HE	brca_tcga_pan_can_atlas_2018	6029	censored	0.985203	12.3286
TCGA-C8-A1HM	brca_tcga_pan_can_atlas_2018	6028	censored	0.985203	12.3286
TCGA-C8-A1HO	brca_tcga_pan_can_atlas_2018	6027	censored	0.985203	12.3286
TCGA-E9-A295	brca_tcga_pan_can_atlas_2018	6026	censored	0.985203	12.3286
TCGA-C8-A26X	brca_tcga	6025	censored	0.985203	12.35
TCGA-LL-A7T0	brca_tcga	6024	censored	0.985203	12.35
TCGA-C8-A26X	brca_tcga_pub2015	6023	censored	0.985203	12.35
TCGA-C8-A26X	brca_tcga_pan_can_atlas_2018	6022	censored	0.985203	12.3615
TCGA-LL-A7T0	brca_tcga_pan_can_atlas_2018	6021	censored	0.985203	12.3615
TCGA-D8-A1XC	brca_tcga	6020	deceased	0.98504	12.39
TCGA-D8-A1XC	brca_tcga_pub2015	6019	deceased	0.984876	12.39
TCGA-D8-A1XC	brca_tcga_pan_can_atlas_2018	6018	deceased	0.984712	12.3944
MB-0142	brca_metabric	6017	censored	0.984712	12.4
P-0011400	breast_msk_2018	6016	censored	0.984712	12.4
P-0012903	breast_msk_2018	6015	censored	0.984712	12.4
P-0014518	breast_msk_2018	6014	censored	0.984712	12.4
TCGA-C8-A137	brca_tcga	6013	censored	0.984712	12.45
TCGA-C8-A137	brca_tcga_pub2015	6012	censored	0.984712	12.45
TCGA-C8-A137	brca_tcga_pan_can_atlas_2018	6011	censored	0.984712	12.4601
TCGA-C8-A8HQ	brca_tcga	6010	censored	0.984712	12.48
TCGA-C8-A138	brca_tcga	6009	censored	0.984712	12.48
TCGA-C8-A138	brca_tcga_pub2015	6008	censored	0.984712	12.48
TCGA-A2-A1G0	brca_tcga_pub	6007	censored	0.984712	12.48
TCGA-D8-A1X9	brca_tcga_pub	6006	censored	0.984712	12.48
TCGA-C8-A138	brca_tcga_pan_can_atlas_2018	6005	censored	0.984712	12.493
TCGA-C8-A8HQ	brca_tcga_pan_can_atlas_2018	6004	censored	0.984712	12.493
P-0008952	breast_msk_2018	6003	censored	0.984712	12.5
P-0009745	breast_msk_2018	6002	censored	0.984712	12.5
P-0009755	breast_msk_2018	6001	censored	0.984712	12.5
P-0011568	breast_msk_2018	6000	censored	0.984712	12.5
P-0013280	breast_msk_2018	5999	censored	0.984712	12.5
P-0015036	breast_msk_2018	5998	censored	0.984712	12.5
TCGA-C8-A26W	brca_tcga	5997	censored	0.984712	12.52
TCGA-D8-A27V	brca_tcga	5996	censored	0.984712	12.52
TCGA-C8-A26W	brca_tcga_pub2015	5995	censored	0.984712	12.52
TCGA-D8-A27V	brca_tcga_pub2015	5994	censored	0.984712	12.52
TCGA-C8-A26W	brca_tcga_pan_can_atlas_2018	5993	censored	0.984712	12.5259
TCGA-C8-A12Z	brca_tcga	5992	censored	0.984712	12.55
TCGA-C8-A12Z	brca_tcga_pub2015	5991	censored	0.984712	12.55
TCGA-C8-A12Z	brca_tcga_pan_can_atlas_2018	5990	censored	0.984712	12.5588
TCGA-C8-A132	brca_tcga	5989	censored	0.984712	12.58
TCGA-C8-A134	brca_tcga	5988	censored	0.984712	12.58
TCGA-C8-A134	brca_tcga_pub2015	5987	censored	0.984712	12.58
TCGA-C8-A132	brca_tcga_pub2015	5986	censored	0.984712	12.58
TCGA-C8-A132	brca_tcga_pan_can_atlas_2018	5985	censored	0.984712	12.5916
TCGA-C8-A134	brca_tcga_pan_can_atlas_2018	5984	censored	0.984712	12.5916
P-0005473	breast_msk_2018	5983	deceased	0.984548	12.6
P-0008845	breast_msk_2018	5982	censored	0.984548	12.6
P-0009610	breast_msk_2018	5981	censored	0.984548	12.6
P-0009753	breast_msk_2018	5980	censored	0.984548	12.6
P-0012120	breast_msk_2018	5979	censored	0.984548	12.6
P-0016763	breast_msk_2018	5978	censored	0.984548	12.6
TCGA-D8-A73W	brca_tcga	5977	deceased	0.984383	12.65
TCGA-C8-A12O	brca_tcga	5976	censored	0.984383	12.65
TCGA-C8-A12Q	brca_tcga	5975	deceased	0.984218	12.65
TCGA-C8-A12U	brca_tcga	5974	censored	0.984218	12.65
TCGA-C8-A12V	brca_tcga	5973	censored	0.984218	12.65
TCGA-C8-A12W	brca_tcga	5972	censored	0.984218	12.65
TCGA-C8-A12X	brca_tcga	5971	censored	0.984218	12.65
TCGA-C8-A12U	brca_tcga_pub2015	5970	censored	0.984218	12.65
TCGA-C8-A12O	brca_tcga_pub2015	5969	censored	0.984218	12.65
TCGA-C8-A12Q	brca_tcga_pub2015	5968	deceased	0.984054	12.65
TCGA-C8-A12V	brca_tcga_pub2015	5967	censored	0.984054	12.65
TCGA-C8-A12W	brca_tcga_pub2015	5966	censored	0.984054	12.65
TCGA-C8-A12X	brca_tcga_pub2015	5965	censored	0.984054	12.65
TCGA-C8-A12O	brca_tcga_pan_can_atlas_2018	5964	censored	0.984054	12.6574
TCGA-C8-A12Q	brca_tcga_pan_can_atlas_2018	5963	deceased	0.983888	12.6574
TCGA-C8-A12U	brca_tcga_pan_can_atlas_2018	5962	censored	0.983888	12.6574
TCGA-C8-A12V	brca_tcga_pan_can_atlas_2018	5961	censored	0.983888	12.6574
TCGA-C8-A12W	brca_tcga_pan_can_atlas_2018	5960	censored	0.983888	12.6574
TCGA-C8-A12X	brca_tcga_pan_can_atlas_2018	5959	censored	0.983888	12.6574
TCGA-D8-A73W	brca_tcga_pan_can_atlas_2018	5958	deceased	0.983723	12.6574
TCGA-A7-A0DC	brca_tcga_pub	5957	censored	0.983723	12.68
P-0009626	breast_msk_2018	5956	deceased	0.983558	12.7
P-0014516	breast_msk_2018	5955	censored	0.983558	12.7
TCGA-A7-A13F	brca_tcga_pub	5954	censored	0.983558	12.71
TCGA-E2-A1L9	brca_tcga_pub	5953	censored	0.983558	12.75
P-0014928	breast_msk_2018	5952	censored	0.983558	12.8
P-0015602	breast_msk_2018	5951	censored	0.983558	12.8
P-0017190	breast_msk_2018	5950	censored	0.983558	12.8
TCGA-BH-A0HU	brca_tcga	5949	censored	0.983558	12.88
TCGA-BH-A0HU	brca_tcga_pub2015	5948	censored	0.983558	12.88
TCGA-BH-A0HU	brca_tcga_pub	5947	censored	0.983558	12.88
TCGA-E2-A1IN	brca_tcga_pub	5946	censored	0.983558	12.88
TCGA-BH-A0HU	brca_tcga_pan_can_atlas_2018	5945	censored	0.983558	12.8875
P-0012362	breast_msk_2018	5944	censored	0.983558	12.9
TCGA-C8-A135	brca_tcga	5943	censored	0.983558	12.91
TCGA-E2-A15H	brca_tcga	5942	censored	0.983558	12.91
TCGA-E2-A15H	brca_tcga_pub2015	5941	censored	0.983558	12.91
TCGA-C8-A135	brca_tcga_pub2015	5940	censored	0.983558	12.91
TCGA-C8-A135	brca_tcga_pan_can_atlas_2018	5939	censored	0.983558	12.9204
TCGA-E2-A15H	brca_tcga_pan_can_atlas_2018	5938	censored	0.983558	12.9204
MB-0134	brca_metabric	5937	deceased	0.983393	12.9333
TCGA-C8-A1HN	brca_tcga	5936	censored	0.983393	12.94
TCGA-C8-A3M8	brca_tcga	5935	censored	0.983393	12.94
TCGA-C8-A1HN	brca_tcga_pub2015	5934	censored	0.983393	12.94
TCGA-C8-A3M8	brca_tcga_pub2015	5933	censored	0.983393	12.94
TCGA-C8-A1HN	brca_tcga_pan_can_atlas_2018	5932	censored	0.983393	12.9533
TCGA-C8-A3M8	brca_tcga_pan_can_atlas_2018	5931	censored	0.983393	12.9533
TCGA-D8-A1XU	brca_tcga	5930	censored	0.983393	12.98
TCGA-D8-A1XU	brca_tcga_pub2015	5929	censored	0.983393	12.98
TCGA-E2-A15O	brca_tcga_pub	5928	censored	0.983393	12.98
TCGA-D8-A1XU	brca_tcga_pan_can_atlas_2018	5927	censored	0.983393	12.9862
P-0011063	breast_msk_2018	5926	censored	0.983393	13
P-0013877	breast_msk_2018	5925	censored	0.983393	13
P-0015045	breast_msk_2018	5924	censored	0.983393	13
TCGA-C8-A8HP	brca_tcga	5923	censored	0.983393	13.01
TCGA-A8-A06P	brca_tcga	5922	censored	0.983393	13.01
TCGA-A8-A086	brca_tcga	5921	censored	0.983393	13.01
TCGA-A8-A0A4	brca_tcga	5920	censored	0.983393	13.01
TCGA-A8-A06P	brca_tcga_pub2015	5919	censored	0.983393	13.01
TCGA-A8-A086	brca_tcga_pub2015	5918	censored	0.983393	13.01
TCGA-A8-A0A4	brca_tcga_pub2015	5917	censored	0.983393	13.01
TCGA-A8-A06P	brca_tcga_pub	5916	censored	0.983393	13.01
TCGA-A8-A086	brca_tcga_pub	5915	censored	0.983393	13.01
TCGA-A8-A0A4	brca_tcga_pub	5914	censored	0.983393	13.01
TCGA-A8-A09D	brca_tcga_pub	5913	censored	0.983393	13.01
TCGA-A8-A0A9	brca_tcga_pub	5912	censored	0.983393	13.01
TCGA-A8-A06P	brca_tcga_pan_can_atlas_2018	5911	censored	0.983393	13.019
TCGA-A8-A086	brca_tcga_pan_can_atlas_2018	5910	censored	0.983393	13.019
TCGA-A8-A0A4	brca_tcga_pan_can_atlas_2018	5909	censored	0.983393	13.019
TCGA-C8-A8HP	brca_tcga_pan_can_atlas_2018	5908	censored	0.983393	13.019
TCGA-D8-A27H	brca_tcga	5907	censored	0.983393	13.04
TCGA-D8-A27H	brca_tcga_pub2015	5906	censored	0.983393	13.04
TCGA-D8-A27H	brca_tcga_pan_can_atlas_2018	5905	censored	0.983393	13.0519
TCGA-D8-A27T	brca_tcga	5904	censored	0.983393	13.07
TCGA-D8-A27T	brca_tcga_pub2015	5903	censored	0.983393	13.07
TCGA-D8-A27T	brca_tcga_pan_can_atlas_2018	5902	censored	0.983393	13.0848
P-0011462	breast_msk_2018	5901	censored	0.983393	13.1
P-0014482	breast_msk_2018	5900	censored	0.983393	13.1
P-0014775	breast_msk_2018	5899	censored	0.983393	13.1
P-0014854	breast_msk_2018	5898	censored	0.983393	13.1
P-0015051	breast_msk_2018	5897	censored	0.983393	13.2
P-0015054	breast_msk_2018	5896	censored	0.983393	13.2
TCGA-LD-A74U	brca_tcga	5895	censored	0.983393	13.21
TCGA-LD-A74U	brca_tcga_pan_can_atlas_2018	5894	censored	0.983393	13.2163
TCGA-EW-A1J2	brca_tcga	5893	censored	0.983393	13.24
TCGA-D8-A140	brca_tcga	5892	censored	0.983393	13.24
TCGA-D8-A140	brca_tcga_pub2015	5891	censored	0.983393	13.24
TCGA-EW-A1J2	brca_tcga_pub2015	5890	censored	0.983393	13.24
TCGA-D8-A140	brca_tcga_pub	5889	censored	0.983393	13.24
TCGA-D8-A140	brca_tcga_pan_can_atlas_2018	5888	censored	0.983393	13.2492
TCGA-EW-A1J2	brca_tcga_pan_can_atlas_2018	5887	censored	0.983393	13.2492
TCGA-LD-A7W6	brca_tcga	5886	censored	0.983393	13.27
TCGA-LD-A7W6	brca_tcga_pan_can_atlas_2018	5885	censored	0.983393	13.282
TCGA-D8-A1JT	brca_tcga	5884	censored	0.983393	13.3
TCGA-D8-A1JT	brca_tcga_pub2015	5883	censored	0.983393	13.3
P-0009444	breast_msk_2018	5882	censored	0.983393	13.3
P-0009564	breast_msk_2018	5881	censored	0.983393	13.3
P-0011593	breast_msk_2018	5880	censored	0.983393	13.3
P-0014490	breast_msk_2018	5879	censored	0.983393	13.3
P-0016878	breast_msk_2018	5878	censored	0.983393	13.3
TCGA-D8-A1JT	brca_tcga_pub	5877	censored	0.983393	13.31
TCGA-D8-A1JT	brca_tcga_pan_can_atlas_2018	5876	censored	0.983393	13.3149
MB-0114	brca_metabric	5875	censored	0.983393	13.4
MB-0514	brca_metabric	5874	censored	0.983393	13.4
TCGA-A7-A3RF	brca_tcga	5873	censored	0.983393	13.4
TCGA-C8-A8HR	brca_tcga	5872	censored	0.983393	13.4
TCGA-A7-A3RF	brca_tcga_pub2015	5871	censored	0.983393	13.4
P-0001352	breast_msk_2018	5870	deceased	0.983225	13.4
P-0011064	breast_msk_2018	5869	censored	0.983225	13.4
TCGA-A7-A3RF	brca_tcga_pan_can_atlas_2018	5868	censored	0.983225	13.4136
TCGA-C8-A8HR	brca_tcga_pan_can_atlas_2018	5867	censored	0.983225	13.4136
TCGA-A7-A0CJ	brca_tcga_pub	5866	censored	0.983225	13.44
TCGA-A2-A1FZ	brca_tcga_pub	5865	censored	0.983225	13.44
TCGA-D8-A27M	brca_tcga	5864	censored	0.983225	13.47
TCGA-D8-A145	brca_tcga	5863	censored	0.983225	13.47
TCGA-D8-A145	brca_tcga_pub2015	5862	censored	0.983225	13.47
TCGA-D8-A27M	brca_tcga_pub2015	5861	censored	0.983225	13.47
TCGA-D8-A145	brca_tcga_pub	5860	censored	0.983225	13.47
TCGA-D8-A145	brca_tcga_pan_can_atlas_2018	5859	censored	0.983225	13.4793
TCGA-D8-A27M	brca_tcga_pan_can_atlas_2018	5858	censored	0.983225	13.4793
TCGA-C8-A131	brca_tcga	5857	censored	0.983225	13.5
TCGA-C8-A131	brca_tcga_pub2015	5856	censored	0.983225	13.5
TCGA-E2-A15I	brca_tcga_pub	5855	censored	0.983225	13.5
P-0008558	breast_msk_2018	5854	censored	0.983225	13.5
P-0009182	breast_msk_2018	5853	censored	0.983225	13.5
P-0011060	breast_msk_2018	5852	censored	0.983225	13.5
P-0014519	breast_msk_2018	5851	censored	0.983225	13.5
P-0016831	breast_msk_2018	5850	censored	0.983225	13.5
TCGA-C8-A131	brca_tcga_pan_can_atlas_2018	5849	censored	0.983225	13.5122
TCGA-GM-A5PV	brca_tcga	5848	censored	0.983225	13.53
MB-6019	brca_metabric	5847	deceased	0.983057	13.5333
TCGA-GM-A5PV	brca_tcga_pan_can_atlas_2018	5846	censored	0.983057	13.5451
TCGA-AC-A6IW	brca_tcga	5845	censored	0.983057	13.57
TCGA-AC-A6IW	brca_tcga_pan_can_atlas_2018	5844	censored	0.983057	13.5779
TCGA-BH-A0HP	brca_tcga	5843	censored	0.983057	13.6
TCGA-BH-A0HP	brca_tcga_pub2015	5842	censored	0.983057	13.6
TCGA-BH-A0HP	brca_tcga_pub	5841	censored	0.983057	13.6
P-0009120	breast_msk_2018	5840	censored	0.983057	13.6
P-0014510	breast_msk_2018	5839	censored	0.983057	13.6
P-0015008	breast_msk_2018	5838	censored	0.983057	13.6
TCGA-BH-A0HP	brca_tcga_pan_can_atlas_2018	5837	censored	0.983057	13.6108
TCGA-A1-A0SJ	brca_tcga	5836	censored	0.983057	13.67
TCGA-A1-A0SJ	brca_tcga_pub2015	5835	censored	0.983057	13.67
TCGA-A1-A0SJ	brca_tcga_pan_can_atlas_2018	5834	censored	0.983057	13.6766
TCGA-AC-A62X	brca_tcga	5833	censored	0.983057	13.7
P-0012006	breast_msk_2018	5832	censored	0.983057	13.7
P-0012731	breast_msk_2018	5831	censored	0.983057	13.7
P-0016818	breast_msk_2018	5830	censored	0.983057	13.7
TCGA-AC-A62X	brca_tcga_pan_can_atlas_2018	5829	censored	0.983057	13.7094
TCGA-A7-A4SB	brca_tcga	5828	censored	0.983057	13.73
TCGA-A7-A4SB	brca_tcga_pub2015	5827	censored	0.983057	13.73
TCGA-A7-A4SB	brca_tcga_pan_can_atlas_2018	5826	censored	0.983057	13.7423
MB-5296	brca_metabric	5825	deceased	0.982888	13.8
P-0000214	breast_msk_2018	5824	deceased	0.982719	13.8
P-0004386	breast_msk_2018	5823	deceased	0.982551	13.8
P-0014937	breast_msk_2018	5822	censored	0.982551	13.8
P-0014942	breast_msk_2018	5821	censored	0.982551	13.8
P-0015241	breast_msk_2018	5820	censored	0.982551	13.8
TCGA-S3-AA11	brca_tcga	5819	censored	0.982551	13.83
TCGA-A7-A26E	brca_tcga_pub	5818	censored	0.982551	13.83
TCGA-S3-AA11	brca_tcga_pan_can_atlas_2018	5817	censored	0.982551	13.8409
TCGA-BH-A0DK	brca_tcga	5816	censored	0.982551	13.9
TCGA-BH-A0DK	brca_tcga_pub2015	5815	censored	0.982551	13.9
TCGA-BH-A0DK	brca_tcga_pub	5814	censored	0.982551	13.9
P-0014855	breast_msk_2018	5813	censored	0.982551	13.9
P-0014894	breast_msk_2018	5812	censored	0.982551	13.9
P-0015148	breast_msk_2018	5811	censored	0.982551	13.9
P-0015273	breast_msk_2018	5810	censored	0.982551	13.9
P-0016840	breast_msk_2018	5809	censored	0.982551	13.9
P-0016912	breast_msk_2018	5808	censored	0.982551	13.9
P-0016929	breast_msk_2018	5807	censored	0.982551	13.9
TCGA-BH-A0DK	brca_tcga_pan_can_atlas_2018	5806	censored	0.982551	13.9067
TCGA-EW-A1PD	brca_tcga	5805	censored	0.982551	13.93
TCGA-S3-AA17	brca_tcga	5804	censored	0.982551	13.93
TCGA-EW-A1PD	brca_tcga_pub2015	5803	censored	0.982551	13.93
TCGA-EW-A1PD	brca_tcga_pan_can_atlas_2018	5802	censored	0.982551	13.9396
TCGA-S3-AA17	brca_tcga_pan_can_atlas_2018	5801	censored	0.982551	13.9396
TCGA-D8-A142	brca_tcga	5800	censored	0.982551	13.96
TCGA-D8-A142	brca_tcga_pub2015	5799	censored	0.982551	13.96
TCGA-D8-A142	brca_tcga_pub	5798	censored	0.982551	13.96
TCGA-D8-A142	brca_tcga_pan_can_atlas_2018	5797	censored	0.982551	13.9724
TCGA-D8-A1JH	brca_tcga	5796	censored	0.982551	13.99
TCGA-A8-A07I	brca_tcga	5795	censored	0.982551	13.99
TCGA-A8-A09X	brca_tcga	5794	deceased	0.982381	13.99
TCGA-A8-A07I	brca_tcga_pub2015	5793	censored	0.982381	13.99
TCGA-A8-A09X	brca_tcga_pub2015	5792	deceased	0.982211	13.99
TCGA-D8-A1JH	brca_tcga_pub2015	5791	censored	0.982211	13.99
TCGA-A8-A09X	brca_tcga_pub	5790	deceased	0.982042	14
TCGA-A8-A07I	brca_tcga_pub	5789	censored	0.982042	14
TCGA-A1-A0SJ	brca_tcga_pub	5788	censored	0.982042	14
TCGA-D8-A1JH	brca_tcga_pub	5787	censored	0.982042	14
P-0009330	breast_msk_2018	5786	censored	0.982042	14
P-0010321	breast_msk_2018	5785	censored	0.982042	14
P-0012307	breast_msk_2018	5784	censored	0.982042	14
P-0014816	breast_msk_2018	5783	censored	0.982042	14
TCGA-A8-A07I	brca_tcga_pan_can_atlas_2018	5782	censored	0.982042	14.0053
TCGA-A8-A09X	brca_tcga_pan_can_atlas_2018	5781	deceased	0.981872	14.0053
TCGA-D8-A1JH	brca_tcga_pan_can_atlas_2018	5780	censored	0.981872	14.0053
TCGA-E2-A1IP	brca_tcga_pub	5779	censored	0.981872	14.03
TCGA-OL-A66P	brca_tcga	5778	censored	0.981872	14.06
TCGA-E2-A15S	brca_tcga	5777	censored	0.981872	14.06
TCGA-E2-A15S	brca_tcga_pub2015	5776	censored	0.981872	14.06
TCGA-E2-A15S	brca_tcga_pan_can_atlas_2018	5775	censored	0.981872	14.0711
TCGA-OL-A66P	brca_tcga_pan_can_atlas_2018	5774	censored	0.981872	14.0711
MB-2923	brca_metabric	5773	deceased	0.981702	14.1
P-0014929	breast_msk_2018	5772	censored	0.981702	14.1
P-0016815	breast_msk_2018	5771	censored	0.981702	14.1
TCGA-D8-A1Y3	brca_tcga	5770	censored	0.981702	14.13
TCGA-D8-A1Y3	brca_tcga_pub2015	5769	censored	0.981702	14.13
MB-0046	brca_metabric	5768	deceased	0.981532	14.1333
TCGA-D8-A1Y3	brca_tcga_pan_can_atlas_2018	5767	censored	0.981532	14.1368
TCGA-D8-A1J8	brca_tcga	5766	censored	0.981532	14.16
TCGA-D8-A143	brca_tcga	5765	censored	0.981532	14.16
TCGA-D8-A143	brca_tcga_pub2015	5764	censored	0.981532	14.16
TCGA-D8-A1J8	brca_tcga_pub2015	5763	censored	0.981532	14.16
TCGA-D8-A143	brca_tcga_pub	5762	censored	0.981532	14.16
MB-5318	brca_metabric	5761	deceased	0.981361	14.1667
TCGA-D8-A143	brca_tcga_pan_can_atlas_2018	5760	censored	0.981361	14.1697
TCGA-D8-A1J8	brca_tcga_pan_can_atlas_2018	5759	censored	0.981361	14.1697
MB-5328	brca_metabric	5758	deceased	0.981191	14.2
TCGA-D8-A1Y2	brca_tcga	5757	censored	0.981191	14.22
TCGA-D8-A1Y2	brca_tcga_pub2015	5756	censored	0.981191	14.22
TCGA-A1-A0SG	brca_tcga_pub	5755	censored	0.981191	14.23
TCGA-D8-A1Y2	brca_tcga_pan_can_atlas_2018	5754	censored	0.981191	14.2355
TCGA-A1-A0SG	brca_tcga	5753	censored	0.981191	14.26
TCGA-A1-A0SG	brca_tcga_pan_can_atlas_2018	5752	censored	0.981191	14.2683
TCGA-BH-A0E2	brca_tcga	5751	censored	0.981191	14.29
TCGA-BH-A0E2	brca_tcga_pub2015	5750	censored	0.981191	14.29
TCGA-BH-A0E2	brca_tcga_pub	5749	censored	0.981191	14.29
P-0010849	breast_msk_2018	5748	censored	0.981191	14.3
P-0014955	breast_msk_2018	5747	censored	0.981191	14.3
P-0016816	breast_msk_2018	5746	censored	0.981191	14.3
TCGA-BH-A0E2	brca_tcga_pan_can_atlas_2018	5745	censored	0.981191	14.3012
TCGA-A1-A0SD	brca_tcga	5744	censored	0.981191	14.36
TCGA-A1-A0SD	brca_tcga_pub2015	5743	censored	0.981191	14.36
TCGA-A1-A0SD	brca_tcga_pub	5742	censored	0.981191	14.36
TCGA-A1-A0SD	brca_tcga_pan_can_atlas_2018	5741	censored	0.981191	14.367
MB-2922	brca_metabric	5740	deceased	0.98102	14.4
P-0011019	breast_msk_2018	5739	censored	0.98102	14.4
P-0011348	breast_msk_2018	5738	censored	0.98102	14.4
P-0014463	breast_msk_2018	5737	censored	0.98102	14.4
P-0014517	breast_msk_2018	5736	censored	0.98102	14.4
P-0014824	breast_msk_2018	5735	censored	0.98102	14.4
P-0015005	breast_msk_2018	5734	censored	0.98102	14.4
TCGA-EW-A1PF	brca_tcga	5733	censored	0.98102	14.42
TCGA-D8-A27I	brca_tcga	5732	censored	0.98102	14.42
TCGA-D8-A27I	brca_tcga_pub2015	5731	censored	0.98102	14.42
TCGA-AQ-A04H	brca_tcga_pub	5730	censored	0.98102	14.42
TCGA-D8-A27I	brca_tcga_pan_can_atlas_2018	5729	censored	0.98102	14.4327
TCGA-EW-A1PF	brca_tcga_pan_can_atlas_2018	5728	censored	0.98102	14.4327
MB-0877	brca_metabric	5727	deceased	0.980849	14.4333
TCGA-LL-A5YO	brca_tcga	5726	censored	0.980849	14.45
TCGA-LL-A5YO	brca_tcga_pub2015	5725	censored	0.980849	14.45
TCGA-LL-A5YO	brca_tcga_pan_can_atlas_2018	5724	censored	0.980849	14.4656
TCGA-A7-A4SD	brca_tcga	5723	censored	0.980849	14.49
TCGA-LL-A740	brca_tcga	5722	censored	0.980849	14.49
TCGA-A7-A4SD	brca_tcga_pub2015	5721	censored	0.980849	14.49
TCGA-A2-A0YI	brca_tcga_pub	5720	censored	0.980849	14.49
TCGA-A7-A4SD	brca_tcga_pan_can_atlas_2018	5719	censored	0.980849	14.4985
TCGA-LL-A740	brca_tcga_pan_can_atlas_2018	5718	censored	0.980849	14.4985
P-0009001	breast_msk_2018	5717	censored	0.980849	14.5
P-0010560	breast_msk_2018	5716	censored	0.980849	14.5
P-0011176	breast_msk_2018	5715	censored	0.980849	14.5
P-0015025	breast_msk_2018	5714	censored	0.980849	14.5
P-0016841	breast_msk_2018	5713	censored	0.980849	14.5
TCGA-AC-A5EI	brca_tcga	5712	censored	0.980849	14.52
TCGA-AC-A5EI	brca_tcga_pan_can_atlas_2018	5711	censored	0.980849	14.5313
P-0010919	breast_msk_2018	5710	censored	0.980849	14.6
P-0014940	breast_msk_2018	5709	censored	0.980849	14.6
TCGA-A2-A0YL	brca_tcga_pub	5708	censored	0.980849	14.62
TCGA-AC-A2QJ	brca_tcga	5707	deceased	0.980677	14.65
TCGA-A7-A4SC	brca_tcga	5706	censored	0.980677	14.65
TCGA-AC-A2QJ	brca_tcga_pub2015	5705	deceased	0.980505	14.65
TCGA-A7-A4SC	brca_tcga_pan_can_atlas_2018	5704	censored	0.980505	14.6629
TCGA-AC-A2QJ	brca_tcga_pan_can_atlas_2018	5703	deceased	0.980333	14.6629
TCGA-D8-A1JU	brca_tcga	5702	censored	0.980333	14.68
TCGA-A7-A425	brca_tcga	5701	censored	0.980333	14.68
TCGA-LL-A5YN	brca_tcga	5700	censored	0.980333	14.68
TCGA-A7-A425	brca_tcga_pub2015	5699	censored	0.980333	14.68
TCGA-D8-A1JU	brca_tcga_pub2015	5698	censored	0.980333	14.68
TCGA-LL-A5YN	brca_tcga_pub2015	5697	censored	0.980333	14.68
TCGA-D8-A1JU	brca_tcga_pub	5696	censored	0.980333	14.69
TCGA-A7-A425	brca_tcga_pan_can_atlas_2018	5695	censored	0.980333	14.6957
TCGA-D8-A1JU	brca_tcga_pan_can_atlas_2018	5694	censored	0.980333	14.6957
TCGA-LL-A5YN	brca_tcga_pan_can_atlas_2018	5693	censored	0.980333	14.6957
MB-6251	brca_metabric	5692	deceased	0.980161	14.7
P-0009738	breast_msk_2018	5691	censored	0.980161	14.7
P-0014492	breast_msk_2018	5690	censored	0.980161	14.7
P-0016198	breast_msk_2018	5689	censored	0.980161	14.7
TCGA-D8-A1XG	brca_tcga	5688	censored	0.980161	14.72
TCGA-A7-A56D	brca_tcga	5687	censored	0.980161	14.72
TCGA-D8-A1XG	brca_tcga_pub2015	5686	censored	0.980161	14.72
TCGA-AO-A1KO	brca_tcga_pub	5685	censored	0.980161	14.72
TCGA-E2-A1IO	brca_tcga_pub	5684	censored	0.980161	14.72
TCGA-A7-A56D	brca_tcga_pan_can_atlas_2018	5683	censored	0.980161	14.7286
TCGA-D8-A1XG	brca_tcga_pan_can_atlas_2018	5682	censored	0.980161	14.7286
TCGA-AO-A0JG	brca_tcga_pub	5681	censored	0.980161	14.75
TCGA-LL-A5YP	brca_tcga	5680	censored	0.980161	14.78
TCGA-LL-A5YP	brca_tcga_pub2015	5679	censored	0.980161	14.78
TCGA-E2-A158	brca_tcga_pub	5678	censored	0.980161	14.78
TCGA-LL-A5YP	brca_tcga_pan_can_atlas_2018	5677	censored	0.980161	14.7944
P-0004450	breast_msk_2018	5676	deceased	0.979988	14.8
P-0005855	breast_msk_2018	5675	deceased	0.979815	14.8
P-0014485	breast_msk_2018	5674	censored	0.979815	14.8
P-0014488	breast_msk_2018	5673	censored	0.979815	14.8
P-0014856	breast_msk_2018	5672	censored	0.979815	14.8
P-0014998	breast_msk_2018	5671	censored	0.979815	14.8
P-0015084	breast_msk_2018	5670	censored	0.979815	14.8
TCGA-AC-A3OD	brca_tcga	5669	censored	0.979815	14.82
TCGA-AC-A3OD	brca_tcga_pub2015	5668	censored	0.979815	14.82
TCGA-AC-A3OD	brca_tcga_pan_can_atlas_2018	5667	censored	0.979815	14.8272
P-0009221	breast_msk_2018	5666	censored	0.979815	14.9
P-0010419	breast_msk_2018	5665	censored	0.979815	14.9
P-0014480	breast_msk_2018	5664	censored	0.979815	14.9
P-0014807	breast_msk_2018	5663	censored	0.979815	14.9
P-0014936	breast_msk_2018	5662	censored	0.979815	14.9
P-0016239	breast_msk_2018	5661	censored	0.979815	14.9
TCGA-A7-A4SA	brca_tcga	5660	censored	0.979815	14.91
TCGA-A7-A4SA	brca_tcga_pub2015	5659	censored	0.979815	14.91
TCGA-A7-A4SA	brca_tcga_pan_can_atlas_2018	5658	censored	0.979815	14.9259
TCGA-AC-A5XU	brca_tcga	5657	censored	0.979815	14.95
TCGA-AC-A5XU	brca_tcga_pan_can_atlas_2018	5656	censored	0.979815	14.9587
TCGA-AC-A3TN	brca_tcga	5655	censored	0.979815	14.98
TCGA-AC-A3TN	brca_tcga_pub2015	5654	censored	0.979815	14.98
TCGA-AC-A3TN	brca_tcga_pan_can_atlas_2018	5653	censored	0.979815	14.9916
P-0014479	breast_msk_2018	5652	censored	0.979815	15
P-0014943	breast_msk_2018	5651	censored	0.979815	15
P-0015012	breast_msk_2018	5650	censored	0.979815	15
P-0016190	breast_msk_2018	5649	censored	0.979815	15
TCGA-A8-A09V	brca_tcga	5648	censored	0.979815	15.01
TCGA-A8-A09V	brca_tcga_pub	5647	censored	0.979815	15.01
TCGA-A8-A09M	brca_tcga_pub	5646	censored	0.979815	15.01
TCGA-A8-A09V	brca_tcga_pan_can_atlas_2018	5645	censored	0.979815	15.0245
TCGA-A8-A084	brca_tcga	5644	censored	0.979815	15.05
TCGA-A8-A084	brca_tcga_pub2015	5643	censored	0.979815	15.05
TCGA-A8-A084	brca_tcga_pub	5642	censored	0.979815	15.05
MB-0361	brca_metabric	5641	deceased	0.979642	15.0667
MB-7258	brca_metabric	5640	deceased	0.979468	15.0667
P-0014468	breast_msk_2018	5639	censored	0.979468	15.1
P-0014575	breast_msk_2018	5638	censored	0.979468	15.1
TCGA-A2-A1FV	brca_tcga_pub	5637	censored	0.979468	15.11
TCGA-D8-A1XV	brca_tcga	5636	censored	0.979468	15.14
TCGA-BH-A0H0	brca_tcga	5635	censored	0.979468	15.14
TCGA-BH-A0H0	brca_tcga_pub2015	5634	censored	0.979468	15.14
TCGA-D8-A1XV	brca_tcga_pub2015	5633	censored	0.979468	15.14
TCGA-BH-A0H0	brca_tcga_pub	5632	censored	0.979468	15.15
TCGA-BH-A0H0	brca_tcga_pan_can_atlas_2018	5631	censored	0.979468	15.156
TCGA-D8-A1XV	brca_tcga_pan_can_atlas_2018	5630	censored	0.979468	15.156
MB-0646	brca_metabric	5629	deceased	0.979294	15.1667
MB-4033	brca_metabric	5628	deceased	0.97912	15.2
P-0014934	breast_msk_2018	5627	censored	0.97912	15.2
TCGA-D8-A1XF	brca_tcga	5626	censored	0.97912	15.21
TCGA-D8-A1XF	brca_tcga_pub2015	5625	censored	0.97912	15.21
TCGA-E2-A15J	brca_tcga_pub	5624	censored	0.97912	15.21
TCGA-E2-A1LA	brca_tcga_pub	5623	censored	0.97912	15.21
TCGA-EW-A1OW	brca_tcga_pub	5622	censored	0.97912	15.21
TCGA-D8-A1XF	brca_tcga_pan_can_atlas_2018	5621	censored	0.97912	15.2218
MB-0191	brca_metabric	5620	deceased	0.978946	15.3
P-0006769	breast_msk_2018	5619	censored	0.978946	15.3
P-0014952	breast_msk_2018	5618	censored	0.978946	15.3
TCGA-LL-A5YM	brca_tcga	5617	censored	0.978946	15.31
TCGA-LL-A5YM	brca_tcga_pub2015	5616	censored	0.978946	15.31
TCGA-LL-A5YM	brca_tcga_pan_can_atlas_2018	5615	censored	0.978946	15.3204
TCGA-XX-A899	brca_tcga	5614	censored	0.978946	15.34
TCGA-XX-A899	brca_tcga_pan_can_atlas_2018	5613	censored	0.978946	15.3533
MB-4354	brca_metabric	5612	deceased	0.978771	15.3667
MB-5114	brca_metabric	5611	deceased	0.978597	15.3667
MB-5361	brca_metabric	5610	deceased	0.978422	15.3667
TCGA-E2-A15F	brca_tcga_pub	5609	censored	0.978422	15.38
P-0014477	breast_msk_2018	5608	censored	0.978422	15.4
P-0015017	breast_msk_2018	5607	censored	0.978422	15.4
TCGA-A2-A0YF	brca_tcga_pub	5606	censored	0.978422	15.41
TCGA-C8-A26Z	brca_tcga	5605	censored	0.978422	15.44
TCGA-C8-A26Z	brca_tcga_pub2015	5604	censored	0.978422	15.44
TCGA-C8-A26Z	brca_tcga_pan_can_atlas_2018	5603	censored	0.978422	15.4519
TCGA-AC-A3W7	brca_tcga	5602	censored	0.978422	15.47
TCGA-AC-A3W7	brca_tcga_pub2015	5601	censored	0.978422	15.47
TCGA-AC-A3W7	brca_tcga_pan_can_atlas_2018	5600	censored	0.978422	15.4848
MB-3497	brca_metabric	5599	deceased	0.978248	15.5
P-0014939	breast_msk_2018	5598	censored	0.978248	15.5
P-0016045	breast_msk_2018	5597	censored	0.978248	15.5
P-0016842	breast_msk_2018	5596	censored	0.978248	15.5
TCGA-D8-A1Y0	brca_tcga	5595	censored	0.978248	15.51
TCGA-D8-A1Y0	brca_tcga_pub2015	5594	censored	0.978248	15.51
TCGA-D8-A1Y0	brca_tcga_pan_can_atlas_2018	5593	censored	0.978248	15.5176
MB-6063	brca_metabric	5592	deceased	0.978073	15.6
TCGA-AQ-A1H2	brca_tcga	5591	censored	0.978073	15.6
TCGA-AQ-A1H2	brca_tcga_pub2015	5590	censored	0.978073	15.6
P-0010869	breast_msk_2018	5589	censored	0.978073	15.6
P-0014464	breast_msk_2018	5588	censored	0.978073	15.6
P-0014481	breast_msk_2018	5587	censored	0.978073	15.6
P-0015034	breast_msk_2018	5586	censored	0.978073	15.6
P-0018521	breast_msk_2018	5585	censored	0.978073	15.6
TCGA-AQ-A1H2	brca_tcga_pan_can_atlas_2018	5584	censored	0.978073	15.6163
MB-4146	brca_metabric	5583	deceased	0.977897	15.6333
TCGA-BH-A0DP	brca_tcga	5582	censored	0.977897	15.64
TCGA-BH-A0DP	brca_tcga_pub2015	5581	censored	0.977897	15.64
TCGA-BH-A0DP	brca_tcga_pub	5580	censored	0.977897	15.64
TCGA-BH-A0DP	brca_tcga_pan_can_atlas_2018	5579	censored	0.977897	15.6491
TCGA-EW-A1J5	brca_tcga	5578	censored	0.977897	15.67
TCGA-LL-A73Y	brca_tcga	5577	censored	0.977897	15.67
TCGA-BH-A0E1	brca_tcga	5576	censored	0.977897	15.67
TCGA-BH-A0E1	brca_tcga_pub2015	5575	censored	0.977897	15.67
TCGA-BH-A0E1	brca_tcga_pub	5574	censored	0.977897	15.67
TCGA-BH-A0E1	brca_tcga_pan_can_atlas_2018	5573	censored	0.977897	15.682
TCGA-EW-A1J5	brca_tcga_pan_can_atlas_2018	5572	censored	0.977897	15.682
TCGA-LL-A73Y	brca_tcga_pan_can_atlas_2018	5571	censored	0.977897	15.682
MB-3006	brca_metabric	5570	deceased	0.977722	15.7
P-0010002	breast_msk_2018	5569	censored	0.977722	15.7
P-0014802	breast_msk_2018	5568	censored	0.977722	15.7
P-0014810	breast_msk_2018	5567	censored	0.977722	15.7
P-0014962	breast_msk_2018	5566	censored	0.977722	15.7
TCGA-D8-A1JC	brca_tcga	5565	censored	0.977722	15.77
TCGA-D8-A1JC	brca_tcga_pub2015	5564	censored	0.977722	15.77
TCGA-D8-A1JC	brca_tcga_pan_can_atlas_2018	5563	censored	0.977722	15.7806
TCGA-E2-A156	brca_tcga_pub	5562	censored	0.977722	15.8
P-0008124	breast_msk_2018	5561	censored	0.977722	15.8
P-0010080	breast_msk_2018	5560	censored	0.977722	15.8
P-0014484	breast_msk_2018	5559	censored	0.977722	15.8
P-0014486	breast_msk_2018	5558	censored	0.977722	15.8
P-0014799	breast_msk_2018	5557	censored	0.977722	15.8
P-0014860	breast_msk_2018	5556	censored	0.977722	15.8
P-0014866	breast_msk_2018	5555	censored	0.977722	15.8
P-0017918	breast_msk_2018	5554	censored	0.977722	15.8
TCGA-D8-A1XR	brca_tcga	5553	censored	0.977722	15.83
TCGA-D8-A1XR	brca_tcga_pub2015	5552	censored	0.977722	15.83
[truncated: 5,551 more rows]

## Sheet: Sheet2
Cell Lines	KDM4A	KDM4C	Lineage
CAL51	5.50653	3.34483	HER2-
JIMT1	5.29719	2.79286	HER2+
CAL148	5.12557	3.57652	HER2-
MDAMB468	4.99955	3.0036	HER2-
HMC18	4.97407	3.39094	HER2-
MDAMB436	4.80116	3.98003	HER2-
EFM19	4.79129	3.24489	HER2-
CAL120	4.76713	3.01614	HER2-
MCF7	4.76288	3.08916	HER2-
MDAMB361	4.74308	2.77821	HEr2+
MDAMB453	4.74039	2.64616	HER2-
KPL1	4.69711	3.19061	HER2-
HCC1428	4.60644	2.33914	HER2-
MFM223	4.44956	2.51602	HER2-
ZR7530	4.40395	3.48671	HER2+
MDAMB415	4.29866	3.45286	HER2-
MDAMB157	4.24641	2.34199	HER2-
SKBR3	4.21179	3.22342	HER2+
AU565	4.09339	3.52857	HER2+
MDAMB231	4.05745	1.78241	HER2-
DU4475	3.99005	4.06523	HER2-
CAMA1	3.98732	3.6241	HER2-
SUM229PE	3.97545	3.16993	HER2-
MDAMB134VI	3.81865	3.7666	HER2-
T47D	3.80323	2.91073	HER2-
MDAMB175VII	3.774	3.25096	HER2-
EFM192A	3.40463	2.29572	HER2+
SUM52PE	3.13093	2.19535	HER2+
ZR751	3.12928	4	HER2+
SUM185PE	2.71589	1.63227	HER2-
