# Supplementary material for: Inhibition of Jumonji Histone Demethylases Selectively Suppresses HER2+ Breast Leptomeningeal Carcinomatosis Growth via Inhibition of GMCSF Expression
Source: Oxford University Press journal article supplement (doi:10.1158/0008-5472.can-20-3317), 2021-05-03
Supplement: 00085472can203317-sup-253018_3_supp_7065616_qrvzbb.xlsx [file 00085472can203317-sup-253018_3_supp_7065616_qrvzbb.xlsx]

## Sheet: Raw Data
Compounds	Rep1	Rep2	Rep3	Mean	Standard deviations	Target	Detailed Information
JIB04	7	8	6	7	1	Histone Demethylase	JIB-04 is a pan-selective <b>Jumonji histone demethylase</b> inhibitor with <b>IC50</b> of 230, 340, 855, 445, 435, 1100, and 290 nM for JARID1A, JMJD2E, JMJD3, JMJD2A, JMJD2B, JMJD2C, and JMJD2D in cell-free assays, respectively.
Barasertib (AZD1152-HQPA)	10.1445	12.157	13.5214	11.941	1.6988	Aurora Kinase	AZD1152-HQPA (Barasertib) is a highly selective Aurora B inhibitor with IC50 of 0.37 nM, ~100 fold more selective for Aurora B over Aurora A.
AZD2461	18.874	11.247	20.3595	16.8269	4.88902	PARP	AZD2461 is a novel PARP inhibitor with low affinity for Pgp than Olaparib. Phase 1.
Chaetocin	20	18	16	18	2	histone methyltransferase inhibitor	Chaetocin, a natural product from Chaetomium species, is a histone methyltransferase inhibitor with IC50 of 0.8 μM, 2.5 μM and 3 μM for dSU(VAR)3-9, mouse G9a and Neurospora crassa DIM5, respectively. Chaetocin is an anticancer agent and inhibitor of thioredoxin reductase (TrxR).
Trichostatin-A	20	22	18	20	2	HDAC	Trichostatin A (TSA) is an HDAC inhibitor with IC50 of ~1.8 nM – HDAC8 is the only known member of the HDAC-family that is not affected by TSA. Phase 3.
MLN8054	13.6499	24.1497	29.369	22.3895	8.00604	Aurora Kinase	MLN8054 is a potent and selective inhibitor of Aurora A with IC50 of 4 nM. It is more than 40-fold selective for Aurora A than Aurora B. Phase 1.
Ricolinostat (ACY-1215)	22.9227	21.9871	24.794	23.2346	1.42918	HDAC	Rocilinostat (ACY-1215) is a selective HDAC6 inhibitor with IC50 of 5 nM. It is >10-fold more selective for HDAC6 than HDAC1/2/3 (class I HDACs) with slight activity against HDAC8, minimal activity against HDAC4/5/7/9/11, Sirtuin1, and Sirtuin2.
ENMD-2076 L-(+)-Tartaric acid	24.1269	31.8877	14.9509	23.6552	8.47823	Aurora Kinase,FLT3,VEGFR	ENMD-2076 L-(+)-Tartaric acid is the tartaric acid of ENMD-2076, selective activity against Aurora A and Flt3 with IC50 of 14 nM and 1.86 nM, 25-fold more selective for Aurora A than Aurora B and less potent to VEGFR2/KDR and VEGFR3, FGFR1 and FGFR2 and PDGFRα. Phase 2.
Iniparib (BSI-201)	24.4939	23.299	25.6887	24.4939	1.19482	PARP	BSI-201 (Iniparib, SAR240550) is a PARP1 inhibitor with demonstrated effectiveness in triple-negative breast cancer (TNBC). Phase 3.
Danusertib (PHA-739358)	23	25	27	25	2	Aurora Kinase,Bcr-Abl,c-RET,FGFR	Danusertib (PHA-739358) is an Aurora kinase inhibitor for Aurora A/B/C with IC50 of 13 nM/79 nM/61 nM, modestly potent to Abl, TrkA, c-RET and FGFR1, and less potent to Lck, VEGFR2/3, c-Kit, CDK2, etc. Phase 2.
2-Methoxyestradiol (2-MeOE2)	20.3521	29.89	27.12	25.7874	4.90664	HIF	2-Methoxyestradiol depolymerizes microtubules and blocks HIF-1α nuclear accumulation and HIF-transcriptional activity. Phase 2.
Nexturastat A	26.4548	25.1643	27.7453	26.4548	1.29048	HDAC	Nexturastat A is a potent and selective HDAC6 inhibitor with IC50 of 5 nM, >190-fold selectivity over other HDACs.
BI-7273	17.7813	35.5627	28.4638	27.2693	8.95065	Epigenetic Reader Domain	BI-7273 is a potent, selective, and cell-permeable BRD9 BD Inhibitor.
RVX-208	32.3442	26.5693	23.2367	27.3834	4.60801	Epigenetic Reader Domain	RVX-208 is a potent BET bromodomain inhibitor with IC50 of 0.510 μM for BD2, about 170-fold selectivity over BD1. Phase 2.
Bromosporine	29	31	27	29	2	Epigenetic Reader Domain	Bromosporine is a broad spectrum inhibitor for bromodomains with IC50 of 0.41 μM, 0.29 μM, 0.122 μM and 0.017 μM for BRD2, BRD4, BRD9 and CECR2, respectively.
Decitabine	29.7421	32.2529	25.7475	29.2475	3.28076	DNA Methyltransferase	Decitabine is a potent inhibitor of DNA methylation with IC50 of 438 nM and 4.38 nM in HL-60 and KG1a cells, respectively.
Oclacitinib	25	30	33	29.3333	4.04145	JAK	Oclacitinib is a novel inhibitor of JAK family members with IC50 ranging from 10 to 99 nM and JAK1-dependent cytokines with IC50 ranging from 36 to 249 nM, which did not inhibit a panel of 38 non-JAK kinases.
WP1066	30.7981	29.2958	32.3005	30.7981	1.50235	JAK	WP1066 is a novel inhibitor of JAK2 and STAT3 with IC50 of 2.30 μM and 2.43 μM in HEL cells; shows activity to JAK2, STAT3, STAT5, and ERK1/2 not JAK1 and JAK3.
CYT387	23.2595	33.1659	39.159	31.8615	8.0296	JAK	CYT387 is an ATP-competitive inhibitor of JAK1/JAK2 with IC50 of 11 nM/18 nM, ~10-fold selectivity versus JAK3. Phase 1/2.
PJ34	34.5127	31.2942	30.9975	32.2681	1.94948	PARP	PJ-34 is a PARP inhibitor with EC50 of 20 nM and is equally potent to PARP1/2.
PF-CBP1	23.3152	37.39	37.64	32.7817	8.1992	Epigenetic Reader Domain	PF-CBP1 is a highly selective inhibitor of the bromodomain of CREB-binding protein(CREBBP).It inhibits CREBBP and p300 bromodomains with IC50 of 125 and 363 nM respectively.
PJ34 HCl	21.1629	41.04	38.05	33.4176	10.7177	PARP	PJ34 HCl is the hydrochloride salt of PJ34, which is a PARP inhibitor with EC50 of 20 nM and is equally potent to PARP1/2.
INO-1001	33.5524	34.8429	32.2619	33.5524	1.29048	PARP	INO-1001 is a potent inhibitor of PARP with IC50 of <50 nM in CHO cells and a mediator of oxidant-induced myocyte dysfunction during reperfusion. Phase 2.
CPI-203	33.7158	32.0711	35.3605	33.7158	1.64468	Epigenetic Reader Domain	CPI-203 is a potent BET bromodomain inhibitor with IC50 of 37 nM for BRD4.
IOX2	45.664	32.48	23.49	33.878	11.1529	HIF	IOX2 is a potent inhibitor of HIF-1α prolyl hydroxylase-2 (PHD2) with IC50 of 21 nM, >100-fold selectivity over JMJD2A, JMJD2C, JMJD2E, JMJD3, or the 2OG oxygenase FIH.
ZM 447439	41.7485	36.2018	24.2639	34.0714	8.93486	Aurora Kinase	ZM 447439 is a selective and ATP-competitive inhibitor for Aurora A and Aurora B with IC50 of 110 nM and 130 nM, respectively. It is more than 8-fold selective for Aurora A/B than MEK1, Src, Lck and has little effect againstCDK1/2/4, Plk1, Chk1, etc.
I-BET-762	32.5498	31.5925	43.1727	35.7716	6.42733	Epigenetic Reader Domain	I-BET-762 is an inhibitor for BET proteins with IC50 of ~35 nM, suppresses the production of proinflammatory proteins by macrophages and blocks acute inflammation, highly selective over other bromodomain-containing proteins.
SGC707	30.8954	26.9929	56.0979	37.9954	15.7982	Histone Methyltransferase	SGC707 is a potent, selective and cell-active allosteric inhibitor of protein arginine methyltransferase 3 (PRMT3) with IC50 and Kd of 31 nM and 53 nM, respectively.
Procarbazine HCl	33.0058	47.56	34.66	38.4086	7.96839	DNA/RNA Synthesis	Procarbazine HCl is a hydrochloride salt form of procarbazine which is a polyfunctional alkylating compound, used for the treatment of Hodgkin's lymphoma.
PFI-1 (PF-6405761)	46.91	44.9953	24.891	38.9321	12.1976	Epigenetic Reader Domain	PFI-1 is a selective BET (bromodomain-containing protein) inhibitor for BRD4 with IC50 of 0.22 μM.
CX-6258 HCl	39.061	40.5634	37.5587	39.061	1.50235	Pim	CX-6258 HCl is a potent, orally efficacious pan-Pim kinase inhibitor with IC50 of 5 nM, 25 nM and 16 nM for Pim1, Pim2, and Pim3, respectively.
SGI-1027	39.2512	37.3365	41.1659	39.2512	1.9147	DNA Methyltransferase	SGI-1027 is a DNMT inhibitor with IC50 of 6, 8, 7.5 μM for DNMT1, DNMT3A, and DNMT3B
SNS-314 Mesylate	40.0047	48.2	30.13	39.4449	9.048	Aurora Kinase	SNS-314 Mesylate is a potent and selective inhibitor of Aurora A, Aurora B and Aurora C with IC50 of 9 nM, 31 nM, and 3 nM, respectively. It is less potent to Trk A/B, Flt4, Fms, Axl, c-Raf and DDR2. Phase 1.
OTX015	41	39	43	41	2	Epigenetic Reader Domain	OTX015 is a potent BET bromodomain inhibitor with EC50 ranging from 10 to 19 nM for BRD2, BRD3, and BRD4. Phase 1.
MM-102	48.343	44.78	30.21	41.111	9.60717	Histone Methyltransferase	MM-102 is a high-affinity peptidomimetic MLL1 inhibitor with IC50 of 0.4 μM.
TG101348 (SAR302503)	47.8674	50.2607	25.8484	41.3255	13.4569	JAK	TG-101348 (SAR302503) is a selective inhibitor of JAK2 with IC50 of 3 nM, 35- and 334-fold more selective for JAK2 versus JAK1 and JAK3. Phase 1/2.
JNJ-7706621	65.3718	30.44	31.11	42.3073	19.9773	Aurora Kinase,CDK	JNJ-7706621 is pan-CDK inhibitor with the highest potency on CDK1/2 with IC50 of 9 nM/4 nM and showing >6-fold selectivity for CDK1/2 than CDK3/4/6. It also potently inhibits Aurora A/B and has no activity on Plk1 and Wee1.
TMP269	46.0064	49.07	32.12	42.3988	9.03254	HDAC	TMP269 is a potent, selective class IIa HDAC inhibitor with IC50 of 157 nM, 97 nM, 43 nM and 23 nM for HDAC4, HDAC5, HDAC7 and HDAC9, respectively.
CPI-360	40.7564	39.31	47.35	42.4721	4.2858	Histone Methyltransferase	CPI-360 is a potent, selective,and SAM-competitive <b>EZH1</b> inhibitor with <b>IC50</b> of 102.3 nM, >100-fold selectivity over other methyltransferases.
AG-14361	44.3449	47.4	36.09	42.6116	5.85083	PARP	AG14361 is a potent inhibitor of PARP1 with Ki of <5 nM. It is at least 1000-fold more potent than the benzamides.
Zebularine	40.2315	46.4145	41.3982	42.6814	3.28514	DNA Methyltransferase	Zebularine is a DNA methylation inhibitor that forms a covalent complex with DNA methyltransferases, also inhibits cytidinedeaminase with Ki of 2 μM.
Lomeguatrib	35.5154	60.02	34.43	43.3218	14.4713	DNA Methyltransferase	Lomeguatrib is a potent inhibitor of O6-alkylguanine-DNA-alkyltransferase with IC50 of 5 nM.
(+)-JQ1	34	45	51	43.3333	8.62168	Epigenetic Reader Domain	(+)-JQ1 is a BET bromodomain inhibitor, with IC50 of 77 nM/33 nM for BRD4(1/2), binding to all bromodomains of the BET family, but not to bromodomains outside the BET family.
Vorinostat (SAHA, MK0683)	43.8762	42.5858	45.1667	43.8762	1.29048	Autophagy,HDAC	Vorinostat (suberoylanilide hydroxamic acid, SAHA) is an HDAC inhibitor with IC50 of ~10 nM.
VX-680 (Tozasertib, MK-0457)	47.7663	53.2018	30.9325	43.9669	11.6107	Aurora Kinase	VX-680 (Tozasertib, MK-0457) is a pan-Aurora inhibitor, mostly against Aurora A with Kiapp of 0.6 nM, less potent towards Aurora B/Aurora C and 100-fold more selective for Aurora A than 55 other kinases. Phase 2.
MS436	43	35	55	44.3333	10.0664	Epigenetic Reader Domain	MS436 is a selective <b>BET bromodomain</b> inhibitor with <b>K<sub>i</sub></b> of <0.085 μM and 0.34 μM for BRD4 (1) and BRD4 (2), respectively.
Entacapone	51.9044	54.68	29.17	45.2515	13.9959	Histone Methyltransferase	Entacapone inhibits catechol-O-methyltransferase(COMT) with IC50 of 151 nM.
Ellagic acid	46.2382	55.69	34.31	45.4127	10.7139	Topoisomerase	Ellagic acid has antiproliferative and antioxidant property.
Aurora A Inhibitor I	48.0064	46.62	42.01	45.5455	3.13931	Aurora Kinase	Aurora A Inhibitor I is a novel, potent, and selective inhibitor of Aurora A with IC50 of 3.4 nM. It is 1000-fold more selective for Aurora A than Aurora B.
Sirtinol	44	46	48	46	2	Sirtuin	Sirtinol is a specific SIRT1 and SIRT2 inhibitor with IC50 of 131 μM and 38 μM, respectively.
PFI-2	43.9044	48.88	47.09	46.6248	2.52018	Histone Methyltransferase	PFI-2 is a potent, selective, and cell-active <b>lysine methyltransferase SETD7</b> inhibitor with <b>K<sub>i (app)</sub></b> and <b>IC50</b> of 0.33 nM and 2 nM, 1000-fold selectivity over other methyltransferases and other non-epigenetic targets.
GSK1070916	50.9334	56.42	33	46.7845	12.2489	Aurora Kinase	GSK1070916 is a reversible and ATP-competitive inhibitor of Aurora B/C with IC50 of 3.5 nM/6.5 nM. It displays >100-fold selectivity against the closely related Aurora A-TPX2 complex. Phase 1.
Ruxolitinib (INCB018424)	44.4177	47.46	49.86	47.2459	2.72745	JAK	INCB018424 is the first potent, selective, JAK1/2 inhibitor to enter the clinic with IC50 of 3.3 nM/2.8 nM, >130-fold selectivity for JAK1/2 versus JAK3. Phase 3.
M344	47.2936	45.9026	48.6846	47.2936	1.39099	HDAC	M344 is a potent HDAC inhibitor with IC50 of 100 nM and able to induce cell differentiation.
EI1	48.2	46.14	49.49	47.9433	1.68968	Histone Methyltransferase	EI1 is a potent and selective <b>EZH2</b> inhibitor with <b>IC50</b> of 15 nM and 13 nM for EZH2 (WT) and EZH2 (Y641F), respectively.
PCI-34051	52.1595	35.988	56.6221	48.2566	10.8566	HDAC	PCI-34051 is a potent and specific HDAC8 inhibitor with IC50 of 10 nM. It has greater than 200-fold selectivity over HDAC1 and 6, more than 1000-fold selectivity over HDAC2, 3, and 10.
Sodium Phenylbutyrate	48.3929	49.6834	47.1024	48.3929	1.29048	HDAC	Sodium Phenylbutyrate is a transcriptional regulators that act by altering chromatin structure via the modulation of HDAC activity.
AZ6102	29.4585	60.5168	55.753	48.5761	16.7268	PPAR	AZ6102 is a potent TNKS1/2 inhibitor that has 100-fold selectivity against other PARP family enzymes and shows IC50 of 5 nM for Wnt pathway inhibition in DLD-1 cells.
AZD1208	53	41	52	48.6667	6.65833	Pim	AZD1208 is a potent, and orally available Pim kinase inhibitor with IC50 of 0.4 nM, 5 nM, and 1.9 nM for Pim1, Pim2, and Pim3, respectively. Phase 1.
Remodelin	50.393	52.02	43.67	48.6943	4.4266	Histone Acetyltransferase	Remodelin is a potent <b>acetyl-transferase NAT10</b> inhibitor.
Norfloxacin	56.9526	49.83	40.43	49.0709	8.28744	Topoisomerase	Norfloxacin is a broad-spectrum antibiotic.
Scriptaid	49.7821	51.6967	47.8674	49.7821	1.91469	HDAC	Scriptaid is an inhibitor of HDAC. It shows a greater effect on acetylated H4 than H3.
Carboplatin	62.3449	50.9	36.15	49.7983	13.1322	DNA/RNA Synthesis	Carboplatin is a DNA synthesis inhibitor by binding to DNA and interfering with the cell's repair mechanism in A2780, SKOV-3, IGROV-1, and HX62 cells.
OG-L002	56.9869	51.01	42.09	50.029	7.49673	Histone Demethylase	OG-L002 is a potent and specific LSD1 inhibitor with IC50 of 20 nM, exhibiting 36- and 69-fold selectivity over MAO-B and MAO-A, respectively.
EPZ5676	57.9156	58.1	35.77	50.5952	12.8393	Histone Methyltransferase	EPZ-5676 is an S-adenosyl methionine (SAM) competitive inhibitor of protein methyltransferase DOT1L with Ki of 80 pM, demonstrating >37,000-fold selectivity against all other PMTs tested, inhibits H3K79 methylation in tumor. Phase 1.
Decernotinib (VX-509)	51.0798	49.5775	52.5822	51.0798	1.50235	JAK	Decernotinib (VX-509) is a potent and selective JAK3 inhibitor with Ki of 2.5 nM, >4-fold selectivity over JAK1, JAK2, and TYK2, respectively. Phase 2/3.
FG-4592	52	54	50	52	2	HIF	FG-4592 is an HIF α prolyl hydroxylase inhibitor, stabilizes HIF-2 and induces EPO production. Phase 2/3.
Mitomycin C	52.162	53.553	50.771	52.162	1.39099	DNA/RNA Synthesis	Mitomycin C?is an antineoplastic antibiotic by inhibiting DNA synthesis, used to treat different cancers.
APTSTAT3-9R	59.8936	54.4501	43.7087	52.6841	8.23574	STAT	APTSTAT3-9R is a specific STAT3-binding peptide with addition of a cell-penetrating motif. The treatment of APTSTAT3-9R in various types of cancer cells blocks STAT3 phosphorylation and reduces expression of STAT targets.
Daphnetin	59.8708	57.8654	40.4194	52.7186	10.6985	PKA,EGFR,PKC	Daphnetin, a natural coumarin derivative, is a protein kinase inhibitor, inhibits EGFR, PKA and PKC with IC50 of 7.67 μM, 9.33 μM and 25.01 μM, respectively, also known to exhibit anti-inflammatory and anti-oxidant activities.
GSK591	58.41	55.96	45.75	53.3733	6.71467	Histone Methyltransferase	GSK591 (EPZ015866,GSK3203591) is a potent selective inhibitor of the arginine methyltransferase PRMT5 with IC50 of 11 nM.
AG-490 (Tyrphostin B42)	68.3521	49.95	42.89	53.7307	13.1453	EGFR,JAK	AG-490 (Tyrphostin B42) is an inhibitor of EGFR with IC50 of 0.1 μM, 135-fold more selective for EGFR versus ErbB2, also inhibits JAK2 with no activity to Lck, Lyn, Btk, Syk and Src.
Resminostat	51	59	53	54.3333	4.16333	HDAC	Resminostat dose-dependently and selectively inhibits HDAC1/3/6 with IC50 of 42.5 nM/50.1 nM/71.8 nM, less potent to HDAC8 with IC50 of 877 nM.
CEP-33779	55.9189	54.2742	57.5636	55.9189	1.64468	JAK	CEP33779 is a selective JAK2 inhibitor with IC50 of 1.8 nM, >40- and >800-fold versus JAK1 and TYK2.
UNC0631	66.9518	60.05	41.11	56.0373	13.38	Histone Methyltransferase	UNC0631 is a potent <b>histone methyltransferase G9a</b> inhibitor with <b>IC50</b> of 4 nM.
SGC 0946	68.2382	63.45	37.05	56.2461	16.7958	Histone Methyltransferase	SGC 0946 is a highly potent and selective DOT1L methyltransferase inhibitor with IC50 of 0.3 nM, is inactive against a panel of 12 PMTs and DNMT1.
ENMD-2076	56.338	57.8404	54.8357	56.338	1.50235	Aurora Kinase,FLT3,VEGFR	ENMD-2076 has selective activity against Aurora A and Flt3 with IC50 of 14 nM and 1.86 nM, 25-fold selective for Aurora A than over Aurora B and less potent to VEGFR2/KDR and VEGFR3, FGFR1 and FGFR2 and PDGFRα. Phase 2.
BIX 01294	58.3415	68.04	50.63	59.0038	8.72388	Histone Methyltransferase	BIX01294 is an inhibitor of G9a histone methyltransferase with IC50 of 2.7 μM, reduces H3K9me2 of bulk histones, also weakly inhibits GLP (primarily H3K9me3), no significant activity observed at other histone methyltransferases.
Blasticidin S HCl	56.6605	65.95	57.02	59.8768	5.26258	DNA/RNA Synthesis	Blasticidin S HCl is a nucleoside antibiotic isolated from Stretomyces girseochromogenes, and acts as a DNA and protein synthesis inhibitor, used to select transfected cells carrying bsr or BSD resistance genes.
ML324	60.343	67.94	56.91	61.731	5.64447	Histone Demethylase	ML324 is a selective inhibitor of <b>jumonji histone demethylase (JMJD2)</b> with <b>IC50</b> of 920 nM.
MI-3 (Menin-MLL Inhibitor)	84.8251	59.75	41.33	61.9684	21.8322	Histone Methyltransferase	MI-3 (Menin-MLL Inhibitor) is a potent <b>menin-MLL</b> interaction inhibitor with <b>IC50</b> of 648 nM.
CYC116	79.393	63.45	45.37	62.7377	17.0227	Aurora Kinase,VEGFR	CYC116 is a potent inhibitor of Aurora A/B with Ki of 8.0 nM/9.2 nM, is less potent to VEGFR2 (Ki of 44 nM), with 50-fold greater potency than CDKs, not active against PKA, Akt/PKB, PKC, no effect on GSK-3α/β, CK2, Plk1 and SAPK2A. Phase 1.
GSK1324726A (I-BET726)	63.2334	60.6525	68.3953	64.0937	3.94248	Epigenetic Reader Domain	GSK1324726A (I-BET726) is a highly selective inhibitor of <b>BET</b> family proteins with <b>IC50</b> of 41 nM, 31 nM, and 22 nM for BRD2, BRD3, and BRD4, respectively.
Valproic acid sodium salt (Sodium valproate)	64.4816	63.2006	65.1105	64.2642	0.973319	GABA Receptor,HDAC,Autophagy	Valproic acid sodium salt (Sodium valproate) is a HDAC inhibitor with IC50 of 0.4 mM and also inhibits GABA-transaminase or succinic semialdehyde dehydrogenase.
GSK503	67.3222	60.1	67.75	65.0574	4.29857	Histone Methyltransferase	GSK503 is a potent and specific <b>EZH2</b> methyltransferase inhibitor.
SRT1720	65.0996	63.1849	67.0143	65.0996	1.9147	Sirtuin	SRT1720 is a selective SIRT1 activator with EC50 of 0.16 μM, but is >230-fold less potent for SIRT2 and SIRT3.
TAK-901	67.7501	63.2334	64.5239	65.1691	2.32644	Aurora Kinase	TAK-901 is a novel inhibitor of Aurora A/B with IC50 of 21 nM/15 nM. It is not a potent inhibitor of cellular JAK2, c-Src or Abl. Phase 1.
ITSA-1 (ITSA1)	75.0058	79.2	46.31	66.8386	17.9015	HDAC	ITSA-1 (ITSA1) is an HDAC activator via TSA suppression, but shows no activity towards other HDAC inhibitors.
Filgotinib (GLPG0634)	64.5239	67.7501	69.0406	67.1049	2.32644	JAK	Filgotinib (GLPG0634) is a selective JAK1 inhibitor with IC50 of 10 nM, 28 nM, 810 nM, and 116 nM for JAK1, JAK2, JAK3, and TYK2, respectively. Phase 2.
CUDC-907	68	66	70	68	2	HDAC,PI3K	CUDC-907 is a dual PI3K and HDAC inhibitor for PI3Kα and HDAC1/2/3/10 with IC50 of 19 nM and 1.7 nM/5 nM/1.8 nM/2.8 nM, respectively. Phase 1.
Droxinostat	66.1023	72.6751	66.1902	68.3225	3.76967	HDAC	Droxinostat (CMH, 5809354) is a selective inhibitor of HDAC, mostly for HDACs 6 and 8 with IC50 of 2.47μM and 1.46 μM, greater than 8-fold selective against HDAC3 and no inhibition to HDAC1, 2, 4, 5, 7, 9, and 10.
Gemcitabine HCl	69	70	66	68.3333	2.08167	Autophagy,DNA/RNA Synthesis	Gemcitabine HCl is a DNA synthesis inhibitor with IC50 of 50 nM, 40 nM, 18 nM and 12 nM in PANC1, MIAPaCa2, BxPC3 and Capan2 cells, respectively.
Rucaparib (AG-014699,PF-01367338)	62.6556	55.4113	87.1302	68.399	16.6211	PARP	Rucaparib (AG-014699, PF-01367338) is an inhibitor of PARP with Ki of 1.4 nM for PARP1, also showing binding affinity to eight other PARP domains. Phase 1/2.
PCI-24781 (Abexinostat)	68.1584	65.3764	73.7223	69.0857	4.24954	HDAC	PCI-24781 is a novel pan-HDAC inhibitor mostly targeting HDAC1 with Ki of 7 nM, modest potent to HDACs 2, 3, 6, and 10 and greater than 40-fold selectivity against HDAC8. Phase 1/2.
Tofacitinib (CP-690550) Citrate	73.7033	67.3586	66.7258	69.2625	3.85877	JAK	Tofacitinib citrate (CP-690550 citrate) is a novel inhibitor of JAK3 with IC50 of 1 nM, 20- to 100-fold less potent against JAK2 and JAK1.
Tubastatin A	68.6099	67.91	75.61	70.71	4.25795	HDAC	Tubastatin A is a potent and selective HDAC6 inhibitor with IC50 of 15 nM. It is selective against all the other isozymes (1000-fold) except HDAC8 (57-fold).
GSK J1	92.4604	59.6055	61.4156	71.1605	18.4684	Histone Demethylase	GSK-J1 is a highly potent H3K27 <b>histone demethylase</b> inhibitor with <b>IC50</b> of 28 nM and 53 nM in cell-free assays for JMJD3 (KDM6B) and UTX (KDM6A), respectively, >10-fold selectivity over other tested demethylases.
Olaparib (AZD2281, Ku-0059436)	88.9334	70.44	55.62	71.6645	16.6904	PARP	Olaparib (AZD2281, KU0059436) is a selective inhibitor of PARP1/2 with IC50 of 5 nM/1 nM, 300-times less effective against tankyrase-1. Phase 1/2.
NVP-TNKS656	61.8338	92.9584	61.121	71.9711	18.1791	PARP	NVP-TNKS656 is a highly potent, selective, and orally active tankyrase inhibitor with IC50 of 6 nM for TNKS2, > 300-fold selectivity against PARP1 and PARP2.
Ofloxacin	78.6605	78.1	59.47	72.0768	10.9214	Topoisomerase	Ofloxacin is a synthetic broad-spectrum antimicrobial agent.
Tofacitinib (CP-690550,Tasocitinib)	69.5494	73.0268	74.4178	72.3314	2.50764	JAK	Tofacitinib is a novel inhibitor of JAK3 with IC50 of 1 nM, 20- to 100-fold less potent against JAK2 and JAK1.
3-Deazaneplanocin A (DZNeP)	70.6218	76.1203	70.9612	72.5678	3.08129	Histone Methyltransferase	3-deazaneplanocin A (DZNeP), an analog of adenosine, is a competitive inhibitor of S-adenosylhomocysteine hydrolase with Ki of 50 pM.
Alisertib (MLN8237)	62.7697	75.0967	80.196	72.6875	8.95948	Aurora Kinase	Alisertib (MLN8237) is a selective Aurora A inhibitor with IC50 of 1.2 nM. It has >200-fold higher selectivity for Aurora A than Aurora B. Phase 3.
MG149	71.6033	74.7922	72.2943	72.8966	1.67758	Histone Acetyltransferase	MG149 is a potent <b>histone acetyltransferase</b> inhibitor with <b>IC50</b> of 74 μM and 47 μM for Tip60 and MOF,respectively.
UNC669	79.3222	82.58	58.79	73.5641	12.898	Epigenetic Reader Domain	UNC669 is a potent and selective MBT (malignant brain tumor) inhibitor with IC50 of 6 μM for L3MBTL1, 5- and 11-fold selective over L3MBTL3 and L3MBTL4.
Anacardic Acid	98.9491	78.69	43.75	73.7964	27.923	Histone Acetyltransferase	Anacardic Acid is a potent inhibitor of <b>p300 and p300/CBP-associated factor histone acetyltranferases</b>, which also has antibacterial activity, antimicrobial activity, prostaglandin synthase inhibition, and tyrosinase and lipoxygenase inhibition.
Procainamide HCl	73.7948	69.9538	77.7518	73.8335	3.89916	DNA Methyltransferase,Sodium Channel	Procainamide HCl is a sodium channel blocker, and also a DNA methyltransferase inhibitor, used in the treatment of cardiac arrhythmias.
PHA-680632	92.8251	68.15	60.92	73.965	16.7285	Aurora Kinase	PHA-680632 is potent inhibitor of Aurora A, Aurora B and Aurora C with IC50 of 27 nM, 135 nM and 120 nM, respectively. It has 10- to 200-fold higher IC50 for FGFR1, FLT3, LCK, PLK1, STLK2, and VEGFR2/3.
Mirin	99.5878	81.4755	41.4967	74.1866	29.7235	ATM/ATR	Mirin is a potent Mre11–Rad50–Nbs1 (MRN) complex inhibitor, and inhibits Mre11-associated exonuclease activity.
EX 527 (Selisistat)	81.4733	77.57	63.81	74.2844	9.27872	Sirtuin	EX 527 is a potent and selective SIRT1 inhibitor with IC50 of 38 nM, exhibits >200-fold selectivity against SIRT2 and SIRT3.
S-Ruxolitinib (INCB018424)	73.615	70.6103	79.6244	74.6166	4.58975	JAK	S-Ruxolitinib is the chirality of INCB018424, which is the first potent, selective, JAK1/2 inhibitor to enter the clinic with IC50 of 3.3 nM/2.8 nM, >130-fold selectivity for JAK1/2 versus JAK3. Phase 3.
MI-2 (Menin-MLL Inhibitor)	75.9491	77.33	70.65	74.643	3.52632	Histone Methyltransferase	MI-2 (Menin-MLL Inhibitor) is a potent <b>menin-MLL</b> interaction inhibitor with <b>IC50</b> of 446 nM.
Belinostat (PXD101)	75	77	73	75	2	HDAC	Belinostat (PXD101) is a novel HDAC inhibitor with IC50 of 27 nM, with activity demonstrated in cisplatin-resistant tumors. Phase 1/2.
GSK2879552 2HCl	69.6168	69.3796	86.4312	75.1425	9.77697	Histone Demethylase	GSK2879552 2HCl is a potent, selective, orally bioavailable, irreversible LSD1 inhibitor with Kiapp of 1.7 μM. Phase 1.
Quercetin	82.0047	81.64	62.31	75.3182	11.2669	Src,Sirtuin,PKC,PI3K	Quercetin is a natural flavonoid present in vegetables, fruit and wine and is a PI3K inhibitor with IC50 of 2.4 – 5.4 &mu;M.
Panobinostat (LBH589)	78.8732	73.615	75.1174	75.8685	2.7084	HDAC	Panobinostat (LBH589) is a novel broad-spectrum HDAC inhibitor with IC50 of 5 nM. Phase 3.
MC1568	76.903	70.1098	80.8488	75.9539	5.43204	HDAC	MC1568 is a selective HDAC inhibitor for maize HD1-A with IC50 of 100 nM. It is 34-fold more selective for HD1-A than HD1-B.
WHI-P154	78.9518	73.05	76.28	76.0939	2.95527	EGFR,JAK	WHI-P154 is a potent JAK3 inhibitor with IC50 of 1.8 μM, no activity against JAK1 or JAK2, also inhibits EGFR, Src, Abl, VEGFR and MAPK, prevents Stat3, but not Stat5 phosphorylation.
Clevudine	70.2109	82.7612	76.8194	76.5972	6.2781	DNA/RNA Synthesis	Clevudine is an antiviral drug for the treatment of hepatitis B.
GSK J4 HCl	84.4689	71.086	75.7546	77.1031	6.79258	Histone Demethylase	GSK J4 HCl is a cell permeable prodrug of GSK J1, which is the first selective inhibitor of the H3K27 histone demethylase JMJD3 and UTX with IC50 of 60 nM and inactive against a panel of demethylases of the JMJ family.
A-366	71.664	81.8849	77.9303	77.1597	5.15386	Histone Methyltransferase	A-366 is a potent and selective G9a/GLP histone lysine methyltransferase inhibitor with IC50 of 3.3nM, exhibiting >1000-fold selectivity for G9a/GLP over 21 other methyltransferases.
AR-42	75.1174	78.8732	80.3756	78.1221	2.7084	HDAC	AR-42 is an HDAC inhibitor with IC50 of 30 nM. Phase 1.
SGC-CBP30	67.3577	74.8221	93.5326	78.5708	13.4841	Epigenetic Reader Domain	SGC-CBP30 is a potent CREBBP/EP300 inhibitor with IC50 of 21 nM and 38 nM, respectively.
BRD4770	76.5046	85.39	75.83	79.2415	5.33541	Histone Methyltransferase	BRD4770 is a <b>histone methyltransferase G9a</b> inhibitor with <b>IC50</b> of 6.3 μM, and induces cell senescence.
AZD1480	96.2596	80.5	61.71	79.4899	17.297	JAK	AZD1480 is a novel ATP-competitive JAK2 inhibitor with IC50 of 0.26 nM, selectivity against JAK3 and Tyk2, and to a smaller extent against JAK1. Phase 1.
HLCL-61	83.9491	88.48	66.63	79.6864	11.5319	Histone Methyltransferase	HLCL-61 hydrochloride is a potent and selective PRMT5 inhibitor for the treatment of acute myeloid leukemia.
GSK-LSD1 2HCl	74.2604	85.6173	79.3159	79.7312	5.68982	Histone Demethylase	GSK-LSD1 2HCl is an irreversible, and selective <b>LSD1</b> inhibitor with <b>IC50</b> of 16 nM, > 1000 fold selective over other closely related FAD utilizing enzymes (i.e. LSD2, MAO-A, MAO-B).
NVP-BSK805 2HCl	89.3846	75.6048	74.5725	79.854	8.26992	JAK	NVP-BSK805 is a potent and selective ATP-competitive JAK2 inhibitor with IC50 of 0.5 nM,>20-fold selectivity towards JAK1, JAK3 and TYK2.
LY2784544	78	80	82	80	2	JAK	LY2784544 is a potent JAK2 inhibitor with IC50 of 3 nM, effective in JAK2V617F, 8- and 20-fold selective versus JAK1 and JAK3. Phase 2.
EPZ004777	76.6099	82.05	81.99	80.2166	3.12364	Histone Methyltransferase	EPZ004777 is a potent, selective DOT1L inhibitor with IC50 of 0.4 nM.
4SC-202	86.3563	77.3886	78.6007	80.7818	4.86548	HDAC	4SC-202 is a selective class I <b>HDAC</b> inhibitor with <b>IC50</b> of 1.20 μM, 1.12 μM, and 0.57 μM for HDAC1, HDAC2, and HDAC3, respectively. Also displays inhibitory activity against <b>Lysine specific demethylase 1 (LSD1)</b>. Phase 1.
AMG-900	91.3718	67.4822	83.8222	80.8921	12.2114	Aurora Kinase	AMG 900 is a potent and highly selective pan-Aurora kinases inhibitor for Aurora A/B/C with IC50 of 5 nM/4 nM /1 nM. It is >10-fold selective for Aurora kinases than p38α, Tyk2, JNK2, Met and Tie2. Phase 1.
MS023	78.6668	89.2098	75.3664	81.081	7.2306	Histone Methyltransferase	MS023 is a potent, selective, and cell-active Type I PRMT inhibitor with IC50 of 30 nM, 119 nM, 83 nM, 4 nM, and 5 nM for PRMT1, PRMT3, PRMT4, PRMT6 and PRMT8, respectively.
Quisinostat (JNJ-26481585)	86.431	80.135	78.146	81.5707	4.32506	HDAC	JNJ-26481585 is a novel second-generation HDAC inhibitor with highest potency for HDAC1 with IC50 of 0.11 nM, modest potent to HDACs 2, 4, 10, and 11; greater than 30-fold selectivity against HDACs 3, 5, 8, and 9 and lowest potency to HDACs 6 and 7. Phase 2.
Givinostat (ITF2357)	80.589	77.2996	87.1677	81.6854	5.02456	HDAC	Givinostat (ITF2357) is a potent HDAC inhibitor for HDAC2, HDAC1B and HDAC1A with IC50 of 10 nM, 7.5 nM and 16 nM. Phase 1/2.
Mizoribine	71.2099	94.3266	80.1325	81.8897	11.6581	DNA/RNA Synthesis	Mizoribine is an imidazole nucleoside, selectively inhibits inosine monophosphate synthetase and guanosine monophosphate synthetase.
Tranylcypromine (2-PCPA) HCl	89.9638	59.6555	98.5145	82.7113	20.4195	MAO	Tranylcypromine is a monoamine oxidase inhibitor, which inhibits CYP2A6 with Ki of 0.08 μM and 0.2 μM in cDNA-expressing microsomes and Human Liver Microsomes, respectively.
Resveratrol	84.3629	84.8421	79.7716	82.9922	2.79942	Autophagy,Sirtuin	Resveratrol is a phytoalexin produced naturally by several plants with anti-cancer, anti-inflammatory, blood-sugar-lowering and other beneficial cardiovascular effects.
Cytarabine	86.3454	80.589	82.2337	83.056	2.96497	DNA/RNA Synthesis	Cytarabine is an antimetabolic agent and DNA synthesis inhibitor with IC50 of 16 nM in wild-type CCRF-CEM cells.
XL019	94.5046	83.28	71.48	83.0882	11.5135	JAK	XL019 is a potent and selective JAK2 inhibitor with IC50 of 2.2 nM, exhibiting >50-fold selectivity over JAK1, JAK3 and TYK2. Phase 1.
CPI-169	91.7357	82.7088	75.6335	83.3593	8.07077	Histone Methyltransferase	CPI-169 is a potent, and selective <b>EZH2</b> inhibitor with <b>IC50</b> of 0.24 nM, 0.51 nM, and 6.1 nM for EZH2 WT, EZH2 Y641N, and EZH1, respectively.
AT9283	70.5992	99.1736	80.4369	83.4032	14.5163	Aurora Kinase,Bcr-Abl,JAK	AT9283 is a potent JAK2/3 inhibitor with IC50 of 1.2 nM/1.1 nM; also potent to Aurora A/B, Abl(T315I). Phase 1/2.
Hesperadin	80	85	87	84	3.60555	Aurora Kinase	Hesperadin potently inhibits Aurora B with IC50 of 250 nM. It markedly reduces the activity of AMPK, Lck, MKK1, MAPKAP-K1, CHK1 and PHK while it does not inhibit MKK1 activity in vivo.
ORY-1001 (RG-6016)	81.7126	81.9473	88.8029	84.1543	4.02752	Histone Demethylase	ORY-1001 (RG-6016) is an orally active and selective lysine-specific demethylase <b>LSD1/KDM1A</b> inhibitor with <b>IC50</b> of <20 nM, with high selectivity against related FAD dependent aminoxidases. Phase 1.
MK-5108 (VX-689)	74	99.7741	79.0501	84.2747	13.6583	Aurora Kinase	MK-5108 (VX-689) is a highly selective Aurora A inhibitor with IC50 of 0.064 nM and is 220- and 190-fold more selective for Aurora A than Aurora B/C, while it inhibits TrkA with less than 100-fold selectivity. Phase 1.
Pracinostat (SB939)	93.82	89.9906	71.4788	85.0965	11.9477	HDAC	SB939 is a potent pan-HDAC inhibitor with IC50 of 40-140 nM with exception for HDAC6. It has no activity against the class III isoenzyme SIRT I. Phase 2.
UNC1215	100	56.1603	99.7004	85.2869	25.2248	Epigenetic Reader Domain	UNC1215 is a potent and selective MBT (malignant brain tumor) antagonist, which binds L3MBTL3 with IC50 of 40 nM and Kd of 120 nM, 50-fold selective versus other members of the human MBT family.
LAQ824 (Dacinostat)	82.2337	86.3454	87.99	85.523	2.96497	HDAC	LAQ824 (Dacinostat) is a novel HDAC inhibitor with IC50 of 32 nM and is known to activate the p21 promoter.
SGI-1776 free base	91.4389	85.3164	80.3458	85.7004	5.55654	Pim	SGI-1776 is a novel ATP competitive inhibitor of Pim1 with IC50 of 7 nM, 50- and 10-fold selective versus Pim2 and Pim3, also potent to Flt3 and haspin. Phase 1.
Azacitidine	79.3412	96.33	81.4567	85.7093	9.25842	DNA Methyltransferase	Azacitidine is a nucleoside analogue of cytidine that specifically inhibits DNA methylation by trapping DNA methyltransferases.
Entinostat (MS-275)	77.0278	84.7285	96.3051	86.0205	9.70335	HDAC	Entinostat (MS-275) strongly inhibits HDAC1 and HDAC3 with IC50 of 0.51 μM and 1.7 μM, compared with HDACs 4, 6, 8, and 10. Phase 1/2.
ZM 39923 HCl	88.0876	82.9185	87.1514	86.0525	2.75422	JAK	ZM 39923 is an JAK1/3 inhibitor with pIC50 of 4.4/7.1, almost no activity to JAK2 and modestly potent to EGFR; also found to be sensitive to transglutaminase.
EPZ011989	82.263	92.735	83.293	86.097	5.77171	Histone Methyltransferase	EPZ011989 is a potent, selective, orally bioavailable EZH2 inhibitor with Ki of <3 nM.
Pacritinib (SB1518)	85.8708	87.8338	86.7564	86.8203	0.983071	FLT3,JAK	Pacritinib (SB1518) is a potent and selective inhibitor of Janus Kinase 2 (JAK2) and Fms-Like Tyrosine Kinase-3 (FLT3) with IC50s of 23 and 22 nM, respectively.
ME0328	90.4816	85.8936	84.3415	86.9056	3.19271	PARP	ME0328 is a potent and selective PARP inhibitor with IC50 of 0.89 μM for PARP3, about 7-fold selectivity over PARP1.
RGFP966	86.7682	87.1402	86.8531	86.9205	0.19494	HDAC	RGFP966 is an HDAC3 inhibitor with IC50 of 0.08 μM, exhibits > 200-fold selectivity over other HDAC.
Veliparib (ABT-888)	81.7394	95.1096	84.2638	87.0376	7.1036	PARP	Veliparib (ABT-888) is a potent inhibitor of PARP1 and PARP2 with Ki of 5.2 nM and 2.9 nM, respectively. It is inactive to SIRT2. Phase 1/2.
RG2833 (RGFP109)	92.5228	87.8879	83.0733	87.828	4.72504	HDAC	RG2833 (RGFP109) is a brain-penetrant HDAC inhibitor with IC50 of 60 nM and 50 nM for HDAC1 and HDAC3, respectively.
RG108	87.5814	89.8589	86.3687	87.9364	1.77197	DNA Methyltransferase,Transferase	RG108 is an inhibitor of DNA methyltransferase with IC50 of 115 nM, does not cause trapping of covalent enzymes.
KW-2449	69.2979	98.4396	96.33	88.0225	16.2503	Aurora Kinase,Bcr-Abl,FLT3	KW-2449 is a multiple-targeted inhibitor, mostly for Flt3 with IC50 of 6.6 nM, modestly potent to FGFR1, Bcr-Abl and Aurora A; little effect on PDGFRβ, IGF-1R, EGFR. Phase 1.
I-BRD9	98.2639	86.7145	80.3495	88.4426	9.08134	Epigenetic Reader Domain	I-BRD9 (GSK602) is a potent and selective BRD9 inhibitor with pIC50 of 7.3, while it displayed a pIC50 of 5.3 against BRD4.
Baricitinib (LY3009104, INCB028050)	92.137	89.78	85.73	89.2157	3.24057	JAK	Baricitinib is a selective JAK1 and JAK2 inhibitor with IC50 of 5.9 nM and 5.7 nM, ~70 and ~10-fold selective versus JAK3 and Tyk2, no inhibition to c-Met and Chk2. Phase 3.
SP2509	88	91	90	89.6667	1.52753	Histone Demethylase	SP2509 is a selective <b>histone demethylase LSD1</b> inhibitor with <b>IC50</b> of 13 nM, showing no activity against MAO-A, MAO-B, lactate dehydrogenase and glucose oxidase.
CI994 (Tacedinaline)	88.3373	81.9323	98.9265	89.732	8.58249	HDAC	CI-994 (Tacedinaline) is an anti-cancer drug which inhibits HDAC1 with IC50 of 0.57 μM and causes G1 cell cycle arrest. Phase 3.
UNC0379	89.8265	98.9889	80.8613	89.8922	9.06397	Histone Methyltransferase	UNC0379 is a selective, substrate competitive inhibitor of <b>N-lysine methyltransferase SETD8</b> with <b>IC50</b> of 7.9 μM, high selectivity over 15 other methyltransferases.
CUDC-101	98	90	82	90	8	EGFR,HDAC,HER2	CUDC-101 is a potent multi-targeted inhibitor against HDAC, EGFR and HER2 with IC50 of 4.4 nM, 2.4 nM, and 15.7 nM, and inhibits class I/II HDACs, but not class III, Sir-type HDACs. Phase 1.
PFI-3	99.1629	84.56	86.5	90.0743	7.93051	Epigenetic Reader Domain	PFI-3 is a selective chemical probe for <b>SMARCA bromodomains</b>, including SMARCA2, SMARCA4 and PB1(5) bromodomains.
Pirarubicin	96.31	85.179	88.854	90.1143	5.67152	Topoisomerase	Pirarubicin is an anthracycline antibiotic, and also a DNA/RNA synthesis inhibitor by intercalating into DNA and interacts with topoisomerase II, used as an antineoplastic agent.
UPF 1069	80.8112	89.6268	99.9251	90.121	9.56652	PARP	UPF 1069 is a selective PARP2 inhibitor with IC50 of 0.3 μM. It is ~27-fold selective against PARP1.
Nedaplatin	95.2979	90.8376	84.384	90.1731	5.48721	DNA/RNA Synthesis	Nedaplatin is a derivative of cisplatin and DNA damage agent for tumor colony forming units with IC50 of 94 μM.
Mocetinostat (MGCD0103)	95.7347	85.5215	90.4362	90.5641	5.10783	HDAC	Mocetinostat (MGCD0103) is a potent HDAC inhibitor with most potency for HDAC1 with IC50 of 0.15 μM, 2- to 10- fold selectivity against HDAC2, 3, and 11, and no activity to HDAC4, 5, 6, 7, and 8. Phase 1/2.
C646	94.5387	86.0317	91.7239	90.7648	4.33384	Histone Acetyltransferase	C646 is an inhibitor for histone acetyltransferase, and inhibits p300 with a Ki of 400 nM. Preferentially selective for p300 versus other acetyltransferases.
EPZ015666	96	98	80	91.3333	9.86577	Histone Methyltransferase	EPZ015666 is a potent, selective and orally bioavailable <b>PRMT5</b> inhibitor with <b>K<sub>i</sub></b> of 5 nM, >20,000-fold selectivity over other PMTs.
OF-1	100.437	91.5616	82.3318	91.4434	9.05313	Epigenetic Reader Domain	OF-1 is a potent inhibitor of <b>BRPF1B</b> and <b>BRPF2</b> bromodomain with <b>K<sub>d</sub></b> of 100 nM and 500 nM, respectively.
Tubastatin A HCl	96.2109	96.6218	84.4099	92.4142	6.93494	HDAC	Tubastatin A is a potent and selective HDAC6 inhibitor with IC50 of 15 nM. It is selective (1000-fold more) against all other isozymes except HDAC8 (57-fold more).
TG101209	92.8196	88.2918	97.3474	92.8196	4.52779	c-RET,FLT3,JAK	TG101209 is a selective JAK2 inhibitor with IC50 of 6 nM, less potent to Flt3 and RET with IC50 of 25 nM and 17 nM, ~30-fold selective for JAK2 than JAK3, sensitive to JAK2V617F and MPLW515L/K mutations.
IOX1	97.4226	99.4509	81.6296	92.8344	9.75647	Histone Demethylase	IOX1 is a potent and broad-spectrum inhibitor of 2OG oxygenases, including the JmjC demethylases.
MK-4827(Niraparib) tosylate	88.7697	99.7033	92.1023	93.5251	5.60393	PARP	MK-4827(Niraparib) tosylate is a selective inhibitor of PARP1/PARP2 with IC50 of 3.8 nM/2.1 nM.
Daptomycin	90.7377	99.2136	99.7878	96.5797	5.06743	DNA/RNA Synthesis	Daptomycin is a novel antibiotic with rapid in vitro bactericidal activity against gram-positive organisms.
SMI-4a	92.1009	99.8437	98.2457	96.7301	4.08785	Pim	SMI-4a is a potent inhibitor of Pim1 with IC50 of 17 nM, modest potent to Pim-2, does not significantly inhibit other serine/threonine- or tyrosine-kinases.
DMSO	105	98	88	97	8.544
GSK2801	96.7222	95.8541	99.8714	97.4826	2.11386	Epigenetic Reader Domain	GSK2801 is a selective bromodomains <b>BAZ2A/B</b> inhibitor with <b>K<sub>D</sub></b> of 257 nM and 136 nM, respectively.
AZ 960	99.7453	98.6893	94.6074	97.6807	2.71337	JAK	AZ 960 is a novel ATP competitive JAK2 inhibitor with IC50 and Ki of <3 nM and 0.45 nM, 3-fold selectivity of AZ960 for JAK2 over JAK3.
PBS	98	94	106	99.3333	6.1101		Control
